# Supplementary material for: Nickel-catalyzed cross-coupling of N-acyl benzotriazoles with oxiranes and oxetanes for the synthesis of β-haloethyl and γ-halopropyl esters
Source: Royal Society of Chemistry journal article supplement (doi:10.1039/d3qo00973d), 2023-01-01

## SUPPORTING INFORMATION

### **Nickel-Catalyzed Cross-Coupling of *N*-Acyl Benzotriazoles with Oxiranes and Oxetanes for the Synthesis of $\beta$ -Haloethyl and $\gamma$ -Halopropyl Esters**

Jin Bai,<sup>a,b</sup> Erdong Qu,<sup>a,b</sup> Shangzhang Li,<sup>a</sup> Riqian Zhu,<sup>a</sup> Qinyue Deng\*<sup>a</sup> and  
Wanfang Li\*<sup>a</sup>

<sup>a</sup> School of Materials and Chemistry, University of Shanghai for Science and Technology, Shanghai,  
200093, P. R. China

<sup>b</sup> These two authors contribute equally to this work.

\* E-mail: [dqy1991@usst.edu.cn](mailto:dqy1991@usst.edu.cn) (Qinyue Deng); [lwf@usst.edu.cn](mailto:lwf@usst.edu.cn) (Wanfang Li)

## Table of Contents

|                                                                    |     |
|--------------------------------------------------------------------|-----|
| 1. General Information .....                                       | S3  |
| 2. Synthesis of Starting Materials .....                           | S3  |
| 2.1 Preparation of <i>N</i> -acyl benzotriazoles .....             | S3  |
| 2.2 Preparation of <i>N</i> -acyl amides <b>1a-S1-5</b> .....      | S5  |
| 3. General Procedure for the Ni-Catalyzed Coupling Reactions ..... | S7  |
| 4. Characterization Data for the Products .....                    | S7  |
| 5. References .....                                                | S20 |
| 6. Copies of NMR Spectra .....                                     | S22 |

## 1. General Information

All the Ni-catalyzed reactions were set up using standard Schlenk techniques and carried out under N<sub>2</sub> atmosphere with super-dry solvents. All chemicals were obtained from commercial sources and used as received without further purification. The super-dry solvents (dioxane, toluene, THF, DMF, DMSO, etc) for catalytic reactions were purchased from Adamas stored in sure-seal bottles with molecular sieves as the desiccants.

Analytical thin layer chromatography (TLC) was performed on silica gel 60 F254 glass plates. TLC plates were visualized by exposure to short wave ultraviolet light (254 nm, 365 nm) and/or iodine. The products were isolated by flash column chromatography on silica gel (300–400 mesh).

NMR spectra were recorded on a *Bruker AVANCE NEO* 400MHz/500MHz spectrometer at 25 °C in CDCl<sub>3</sub> or DMSO. Data are reported as following: chemical shift (δ), multiplicity (s = singlet, d = doublet, t = triplet, q = quartet, br = broad, m = multiplet), coupling constants (Hz), and integration. Chemical shifts (ppm) are given relative to solvent: reference for CDCl<sub>3</sub> was 7.26 ppm (<sup>1</sup>H NMR) and 77.0 ppm (<sup>13</sup>C NMR); references for *d*<sub>6</sub>-DMSO were 2.50 ppm (<sup>1</sup>H NMR) and 40.0 ppm (<sup>13</sup>C NMR). High-resolution mass spectrometry (HRMS) was measured on an *Agilent 1290-6545XT* mass spectrometer.

## 2. Synthesis of Starting Materials

### 2.1 Preparation of *N*-acyl benzotriazoles

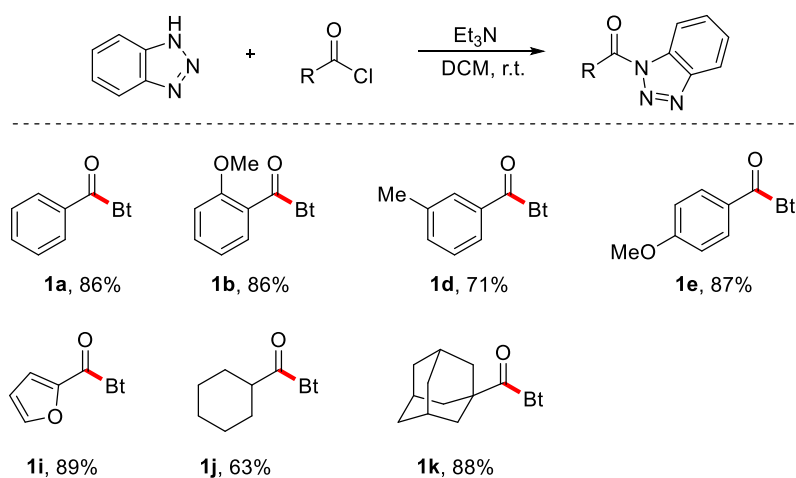

**General Procedure A:**<sup>1</sup> To a solution of benzotriazole (5.0 g, 42.0 mmol) and Et<sub>3</sub>N (7.8 mL, 54.5 mmol) in anhydrous DCM (50 mL) was added the corresponding acyl chloride (50.4 mmol) dissolving in DCM (30 mL) at 0 °C under nitrogen. After stirring for 2 h, the reaction mixture was washed sequentially with 10% aq. HCl (3 × 20 mL), saturated aqueous NaHCO<sub>3</sub> (20 mL) and brine (20 mL) before drying over anhydrous Na<sub>2</sub>SO<sub>4</sub>. After removing of the solvent by rotoevaporation, the crude product was purified by flash column chromatography (Petroleum Ether/Ethyl Acetate). The compounds **1a**, **1b**, **1d**, **1e**, **1i**, **1j**, **1k**, **1a-S<sub>1</sub>**, **1a-S<sub>2</sub>** and **1a-S<sub>3</sub>** were prepared by this procedure.

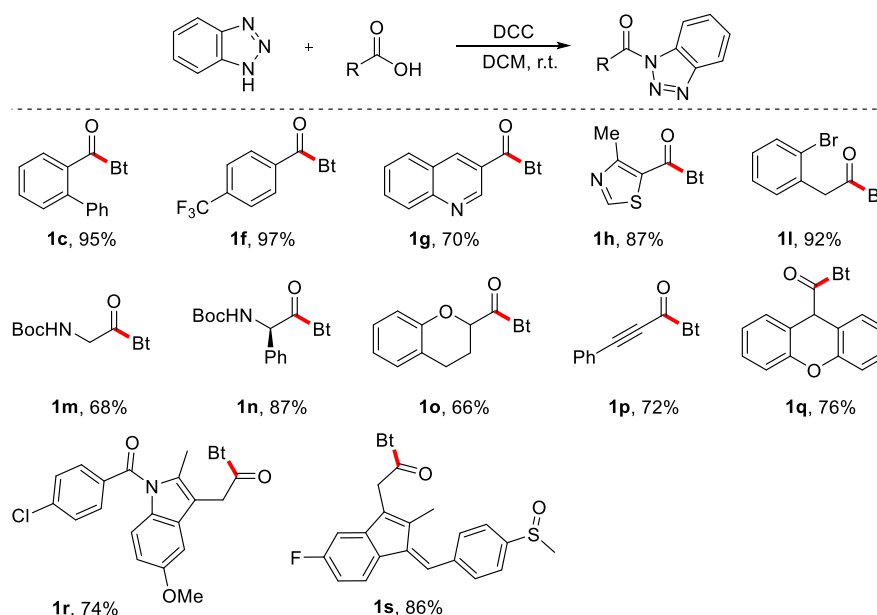

**General Procedure B:**<sup>2</sup> To a solution of benzotriazole (2.0 g, 16.8 mmol) and carboxylic acid (1.2 mmol) in DCM (30 mL) was added 1, 3-dicyclohexylcarbodiimide (5.2 g, 25.2 mmol). The mixture was then stirred at room temperature for 10 h. The precipitate was removed by filtration and the residue was concentrated in vacuo. The crude reaction mixture was then purified by flash column chromatography (Petroleum Ether/Ethyl Acetate) to afford the corresponding *N*-acyl benzotriazoles. The compounds **1c**, **1f**, **1g**, **1h**, **1l**, **1m**, **1n**, **1o**, **1p**, **1q**, **1r** and **1s** were prepared by this procedure.

## 2.2 Preparation of N-acyl amides 1a-S<sub>1-5</sub>

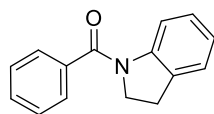

### 1-Benzoylindoline (1a-S<sub>1</sub>)<sup>3</sup>

The compound was synthesized according to the General Procedure A on 8.39 mmol scale and purified by flash column chromatography (Petroleum ether/Ethyl acetate = 2/1) as white solid (1.56 g, 83%). <sup>1</sup>H NMR (400 MHz, CDCl<sub>3</sub>) δ 7.57 – 7.52 (m, 2H), 7.48 – 7.41 (m, 3H), 7.21 (d, *J* = 7.4 Hz, 1H), 7.02 (s, 1H), 4.07 (s, 2H), 3.11 (t, *J* = 8.3 Hz, 2H). <sup>13</sup>C NMR (101 MHz, CDCl<sub>3</sub>) δ 167.9, 142.6, 136.9, 132.3, 130.2, 128.5, 127.1, 127.0, 124.8, 123.8, 117.1, 50.5, 28.0.

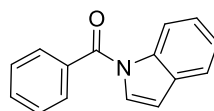

### 1H-Indol-1-ylphenylmethanone (1a-S<sub>2</sub>)<sup>3</sup>

The compound was synthesized according to the General Procedure A on 8.54 mmol scale and purified by flash column chromatography (Petroleum ether/Ethyl acetate = 30/1) as white solid (1.49 g, 78%). <sup>1</sup>H NMR (400 MHz, CDCl<sub>3</sub>) δ 8.45 (d, *J* = 8.2 Hz, 1H), 7.76 – 7.73 (m, 2H), 7.65 – 7.59 (m, 2H), 7.54 (t, *J* = 7.5 Hz, 2H), 7.45 – 7.39 (m, 1H), 7.37 – 7.29 (m, 2H), 6.63 (d, *J* = 3.8 Hz, 1H). <sup>13</sup>C NMR (101 MHz, CDCl<sub>3</sub>) δ 168.6, 136.0, 134.5, 131.8, 130.7, 129.1, 128.5, 127.5, 124.8, 123.9, 120.8, 116.3, 108.5.

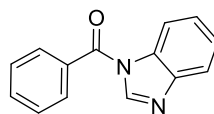

### 1H-Benzimidazol-1-ylphenylmethanone (1a-S<sub>3</sub>)<sup>3</sup>

The compound was synthesized according to the General Procedure A on 8.46 mmol scale and purified by flash column chromatography (Petroleum ether/Ethyl acetate = 30/1) as white solid (1.20 g, 64%). <sup>1</sup>H NMR (400 MHz, CDCl<sub>3</sub>) δ 8.24 (s, 1H), 8.22 – 8.18 (m, 1H), 7.87 – 7.84 (m, 1H), 7.83 – 7.79 (m, 2H), 7.70 (t, *J* = 7.6 Hz, 1H), 7.60 (t, *J* = 7.5 Hz, 2H), 7.49 – 7.41 (m, 2H). <sup>13</sup>C NMR (101 MHz, CDCl<sub>3</sub>) δ 167.0, 143.9, 143.1, 133.1, 132.8, 132.1, 129.5, 129.0, 125.7, 125.2, 120.4, 115.4.

***tert*-Butyl benzoyl(phenyl)carbamate (**1a-S<sub>4</sub>**)<sup>4</sup>**

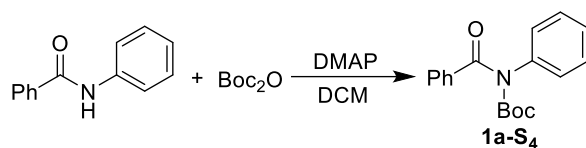

An oven-dried round-bottomed flask was charged with *N*-phenylbenzamide (5.0 mmol, 1.0 equiv), DMAP (0.6 g, 1 equiv) and CH<sub>2</sub>Cl<sub>2</sub> (10 mL). Boc<sub>2</sub>O (1.1 g, 1.0 equiv) was added in one portion and the reaction mixture was allowed to stir at room temperature for 15 h. After the indicated time, the reaction mixture was quenched by with NaHCO<sub>3</sub>, extracted with EtOAc (3× 20 mL), washed with H<sub>2</sub>O. The organic layers were combined, dried, and concentrated. The desired product **1a-S<sub>4</sub>** was purified by flash column chromatography (Petroleum ether/Ethyl acetate = 10/1) as white solid (1.3 g, 87%). <sup>1</sup>H NMR (400 MHz, CDCl<sub>3</sub>) δ 7.78 – 7.67 (m, 2H), 7.55 – 7.49 (m, 1H), 7.47 – 7.40 (m, 4H), 7.37 – 7.24 (m, 3H), 1.23 (s, 9H). <sup>13</sup>C NMR (101 MHz, CDCl<sub>3</sub>) δ 172.6, 153.2, 139.0, 136.8, 131.6, 129.1, 128.2, 128.0, 127.8, 127.7, 83.3, 27.3.

***N*-Phenyl-*N*-tosylbenzamide (**1a-S<sub>5</sub>**)<sup>5</sup>**

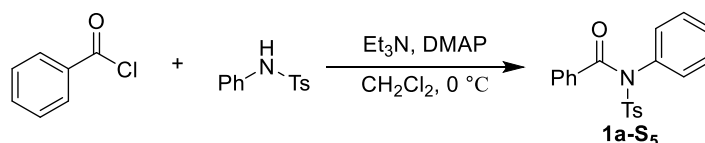

A solution of the *N*-phenyl tosylamide (1.24 g, 5.0 mmol), DMAP (0.5 mmol) and Et<sub>3</sub>N (1.5 mL, 10 mmol) in CH<sub>2</sub>Cl<sub>2</sub> (10 mL) was added slowly to benzoyl chloride (0.7 g, 5.0 mmol) in CH<sub>2</sub>Cl<sub>2</sub> (10 mL) at 0 °C. The reaction mixture was stirred at room temperature for 2 h before washing with 5% HCl, brine and H<sub>2</sub>O. The organic layer was dried over Na<sub>2</sub>SO<sub>4</sub>, filtered and evaporated under reduced pressure to give crude product, which was purified by column chromatography (Petroleum ether/Ethyl acetate = 10/1) to afford **1a-S<sub>5</sub>** as white solid (1.7 g, 97%). <sup>1</sup>H NMR (400 MHz, CDCl<sub>3</sub>) δ 7.87 (d, *J* = 8.38 Hz, 2H), 7.47 (d, *J* = 7.21 Hz, 2H), 7.37 – 7.28 (m, 6H), 7.25 – 7.15 (m, 4H), 2.47 (s, 3H). <sup>13</sup>C NMR (101 MHz, CDCl<sub>3</sub>) δ 169.9, 144.8, 137.3, 136.6, 135.1, 133.5, 131.7, 130.3, 129.5, 129.39, 129.38, 129.19, 129.17, 129.0, 128.9, 127.9, 127.2, 125.1, 121.5, 21.6.

### 3. General Procedure for the Ni-Catalyzed Coupling Reactions

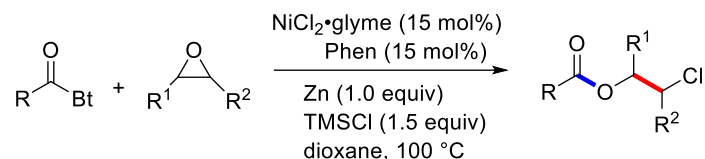

To an oven-dried Schlenk tube was sequentially charged with  $\text{NiCl}_2\cdot\text{glyme}$  (6.6 mg, 0.03 mmol), Phen (5.4 mg, 0.03 mmol), zinc powder (13.1 mg, 0.2 mmol), *N*-acyl benzotriazole (0.2 mmol) under  $\text{N}_2$ . Then the Schlenk tube was capped with a rubber septum before connecting to Schlenk line. After three vacuum and backfill cycles, dioxane (2 mL) was added with an injector. Then oxirane (0.4 mmol) and  $\text{TMSCl}$  (38.0  $\mu\text{L}$ , 0.3 mmol) were added through microsyringes. The perimeter of the septum was carefully sealed with parafilm. Then the mixture was allowed for stirring at 100  $^\circ\text{C}$  metal sand bath for than 12 h. After the reaction mixture was cooled to room temperature, the solvent is removed by a rotary evaporator. The crude product was purified by flash column chromatography (Petroleum Ether/Ethyl Acetate).

### 4. Characterization Data for the Products

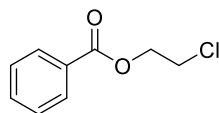

#### 2-Chloroethyl benzoate (3a)<sup>6</sup>

The crude product was purified by flash column chromatography (Petroleum Ether/Ethyl Acetate = 15/1) as yellow oil (32.7 mg, 88%).  $^1\text{H NMR}$  (400 MHz,  $\text{CDCl}_3$ )  $\delta$  8.08 – 8.06 (m, 2H), 7.58 – 7.55 (m, 1H), 7.46 – 7.42 (m, 2H), 4.57 – 4.54 (m, 2H), 3.82 – 3.79 (m, 2H).  $^{13}\text{C NMR}$  (101 MHz,  $\text{CDCl}_3$ )  $\delta$  166.0, 133.1, 129.6, 129.5, 128.3, 64.3, 41.6.

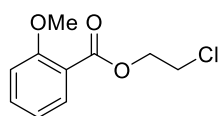

#### 2-Chloroethyl 2-methoxybenzoate (3b)<sup>7</sup>

The crude product was purified by flash column chromatography (Petroleum Ether/Ethyl Acetate = 25/1) as yellow oil (31.1 mg, 72%).  $^1\text{H NMR}$  (600 MHz,  $\text{CDCl}_3$ )

$\delta$  7.79 (d,  $J = 7.77$  Hz, 1H), 7.42 (t,  $J = 8.03$  Hz, 1H), 6.92 (d,  $J = 8.30$  Hz, 2H), 4.48 (s, 2H), 3.84 (s, 3H), 3.74 (d,  $J = 5.77$  Hz, 2H).  $^{13}\text{C}$  NMR (151 MHz,  $\text{CDCl}_3$ )  $\delta$  165.2, 159.2, 133.6, 131.5, 119.9, 119.1, 111.9, 64.0, 55.7, 41.5.

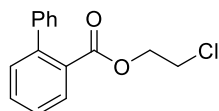

### 2-Chloroethyl [1,1'-biphenyl]-2-carboxylate (3c)<sup>8</sup>

The crude product was purified by flash column chromatography (Petroleum Ether/Ethyl Acetate = 20/1) as colorless oil (29.7 mg, 57%).  $^1\text{H}$  NMR (400 MHz,  $\text{CDCl}_3$ )  $\delta$  7.88 (dd,  $J = 7.7, 1.4$  Hz, 1H), 7.56 (td,  $J = 7.6, 1.4$  Hz, 1H), 7.46 – 7.36 (m, 5H), 7.34 – 7.30 (m, 2H), 4.29 (t,  $J = 5.9$  Hz, 2H), 3.39 (t,  $J = 5.9$  Hz, 2H).  $^{13}\text{C}$  NMR (101 MHz,  $\text{CDCl}_3$ )  $\delta$  167.8, 142.6, 141.2, 131.4, 130.6, 130.1, 129.8, 128.2, 127.9, 127.1, 127.0, 64.2, 40.8.

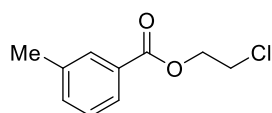

### 2-Chloroethyl 3-methylbenzoate (3d)<sup>7</sup>

The crude product was purified by flash column chromatography (Petroleum Ether/Ethyl Acetate = 20/1) as yellow oil (24.6 mg, 65%).  $^1\text{H}$  NMR (600 MHz,  $\text{CDCl}_3$ )  $\delta$  7.99 – 7.80 (m, 1H), 7.48 – 7.27 (m, 1H), 4.53 (s, 2H), 3.78 (s, 2H), 2.37 (s, 3H).  $^{13}\text{C}$  NMR (151 MHz,  $\text{CDCl}_3$ )  $\delta$  165.9, 137.9, 133.7, 129.9, 129.3, 128.1, 126.6, 64.1, 41.5, 20.9.

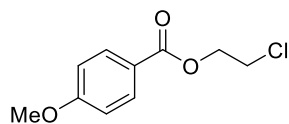

### Benzoic acid, 4-methoxy-, 2-chloroethyl ester (3e)<sup>9</sup>

The crude product was purified by flash column chromatography (Petroleum Ether/Ethyl Acetate = 25/1) as colorless oil (25.5 mg, 59%).  $^1\text{H}$  NMR (400 MHz,  $\text{CDCl}_3$ )  $\delta$  7.99 (d,  $J = 8.9$  Hz, 2H), 6.89 (d,  $J = 8.9$  Hz, 2H), 4.50 (t,  $J = 6.3, 5.2$  Hz, 2H), 3.82 (s, 3H), 3.77 (t,  $J = 6.3, 5.2$  Hz, 2H).  $^{13}\text{C}$  NMR (101 MHz,  $\text{CDCl}_3$ )  $\delta$  165.7, 163.5, 131.6, 121.8, 113.5, 64.0, 55.5, 41.7.



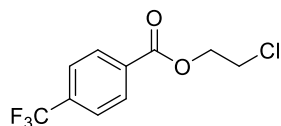

### 2-Chloroethyl-4-(trifluoromethyl)benzoate (3f)<sup>7</sup>

The crude product was purified by flash column chromatography (Petroleum Ether/Ethyl Acetate = 15/1) as colorless oil (33.4 mg, 66%). **<sup>1</sup>H NMR** (400 MHz, CDCl<sub>3</sub>) δ 8.15 (d, *J* = 8.13 Hz, 2H), 7.68 (d, *J* = 8.23 Hz, 2H), 4.65 – 4.27 (m, 2H), 3.87 – 3.61 (m, 2H). **<sup>13</sup>C NMR** (101 MHz, CDCl<sub>3</sub>) δ 164.8, 134.5 (q, *J* = 32.65 Hz), 132.8 (d, *J* = 1.38 Hz), 130.0, 125.3 (q, *J* = 3.76 Hz), 122.2, 64.8, 41.4. **<sup>19</sup>F NMR** (376 MHz, CDCl<sub>3</sub>) δ -63.29.

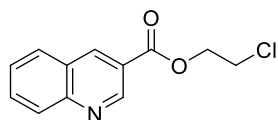

### 2-Chloroethyl quinoline-3-carboxylate (3g)

The crude product was purified by flash column chromatography (Petroleum Ether/Ethyl Acetate = 15/1) as colorless oil (22.3 mg, 47%). **<sup>1</sup>H NMR** (400 MHz, CDCl<sub>3</sub>) δ 9.44 (d, *J* = 2.0 Hz, 1H), 8.84 (d, *J* = 1.9 Hz, 1H), 8.14 (d, *J* = 8.5 Hz, 1H), 7.92 (d, *J* = 8.1 Hz, 1H), 7.84 – 7.80 (m, 1H), 7.62 (dd, *J* = 11.2, 3.9 Hz, 1H), 4.67 – 4.64 (m, 2H), 3.88 – 3.85 (m, 2H). **<sup>13</sup>C NMR** (101 MHz, CDCl<sub>3</sub>) δ 164.9, 149.9, 138.9, 132.0, 129.4, 129.1, 127.5, 126.7, 122.4, 64.8, 41.5.

**HRMS (ESI<sup>+</sup>) m/z:** [M+Na]<sup>+</sup> Calcd for C<sub>12</sub>H<sub>10</sub>ClNNaO<sub>2</sub>, 258.0298; found: 258.0295.

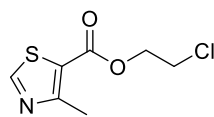

### 2-Chloroethyl-4-methylthiazole-5-carboxylate (3h)

The crude product was purified by flash column chromatography (Petroleum Ether/Ethyl Acetate = 30/1) as white solid (35.8 mg, 85%). **<sup>1</sup>H NMR** (400 MHz, CDCl<sub>3</sub>) δ 8.80 (s, 1H), 4.55 – 4.52 (m, 2H), 3.80 – 3.77 (m, 2H), 2.78 (s, 3H). **<sup>13</sup>C NMR** (101 MHz, CDCl<sub>3</sub>) δ 161.3, 161.0, 155.6, 121.3, 64.4, 41.3, 17.2.

**HRMS (ESI<sup>+</sup>) m/z:** [M+H]<sup>+</sup> Calcd for C<sub>7</sub>H<sub>9</sub>ClNO<sub>2</sub>S, 227.9862; Found: 227.9860.

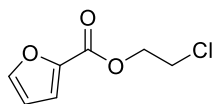

### 2-Chloroethyl furan-2-carboxylate (3i)<sup>7</sup>

The crude product was purified by flash column chromatography (Petroleum Ether/Ethyl Acetate = 10/1) as yellow oil (24.8 mg, 71%). <sup>1</sup>H NMR (600 MHz, CDCl<sub>3</sub>) δ 7.79 (s, 1H), 7.41 (s, 1H), 6.71 (s, 1H), 4.80 – 4.41 (m, 2H), 3.98 (d, *J* = 4.86 Hz, 2H). <sup>13</sup>C NMR (151 MHz, CDCl<sub>3</sub>) δ 157.9, 146.5, 143.8, 118.4, 111.8, 64.1, 41.3.

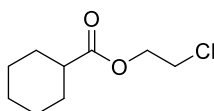

### 2-Chloroethyl cyclohexanecarboxylate (3j)<sup>6</sup>

The crude product was purified by flash column chromatography (Petroleum Ether/Ethyl Acetate = 13/1) as colorless oil (30.0 mg, 79%). <sup>1</sup>H NMR (400 MHz, CDCl<sub>3</sub>) δ 4.26 – 4.21 (m, 2H), 3.62 – 3.57 (m, 2H), 2.31 – 2.24 (m, 1H), 1.88 – 1.81 (m, 2H), 1.73 – 1.64 (m, 2H), 1.43 – 1.32 (m, 2H), 1.27 – 1.11 (m, 4H). <sup>13</sup>C NMR (101 MHz, CDCl<sub>3</sub>) δ 175.4, 63.5, 42.7, 41.6, 28.7, 25.5, 25.1.

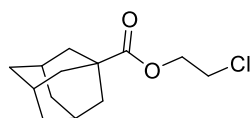

### 2-Chloroethyl (3r,5r,7r)-adamantane-1-carboxylate (3k)

The crude product was purified by flash column chromatography (Petroleum Ether/Ethyl Acetate = 20/1) as colorless oil (39.0 mg, 80%). <sup>1</sup>H NMR (400 MHz, CDCl<sub>3</sub>) δ 4.67 – 4.64 (m, 2H), 4.04 – 4.02 (m, 2H), 2.39 (d, *J* = 8.7 Hz, 3H), 2.26 (dd, *J* = 9.5, 2.7 Hz, 6H), 2.11 – 2.02 (m, 6H). <sup>13</sup>C NMR (101 MHz, CDCl<sub>3</sub>) δ 176.8, 63.3, 41.6, 40.5, 38.5, 36.2, 27.7.

HRMS (ESI<sup>+</sup>) *m/z*: [M+Na]<sup>+</sup> Calcd for C<sub>13</sub>H<sub>19</sub>ClNaO<sub>2</sub>, 265.0971; Found: 265.0964.

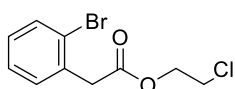

### 2-Chloroethyl 2-bromobenzoate (3l)<sup>10</sup>

The crude product was purified by flash column chromatography (Petroleum

Ether/Ethyl Acetate = 20/1) as yellow oil (24.4 mg, 44%).  $^1\text{H NMR}$  (400 MHz,  $\text{CDCl}_3$ )  $\delta$  7.58 (d,  $J = 8.1$  Hz, 1H), 7.32 – 7.26 (m, 2H), 7.19 – 7.13 (m, 1H), 4.41 – 4.36 (m, 2H), 3.84 (s, 2H), 3.71 – 3.65 (m, 2H).  $^{13}\text{C NMR}$  (101 MHz,  $\text{CDCl}_3$ )  $\delta$  170.0, 133.7, 132.6, 131.4, 128.9, 127.5, 124.8, 64.3, 41.3, 41.2.

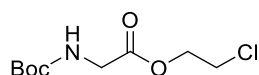

### 2-Chloroethyl (*tert*-butoxycarbonyl) glycinate (**3m**)

The crude product was purified by flash column chromatography (Petroleum Ether/Ethyl Acetate = 15/1) as yellow oil (29.4 mg, 62%).  $^1\text{H NMR}$  (600 MHz,  $\text{CDCl}_3$ )  $\delta$  5.43 – 5.31 (m, 1H), 4.26 (t,  $J = 5.8$  Hz, 2H), 3.82 – 3.73 (m, 2H), 3.57 (t,  $J = 5.7$  Hz, 1H), 1.31 (s, 9H).  $^{13}\text{C NMR}$  (151 MHz,  $\text{CDCl}_3$ )  $\delta$  169.9, 155.6, 79.5, 64.3, 41.9, 41.0, 27.9.

**HRMS (ESI<sup>+</sup>) m/z:**  $[\text{M}+\text{Na}]^+$  Calcd for  $\text{C}_9\text{H}_{16}\text{ClNNaO}_4$ , 260.0666; Found: 260.0670.

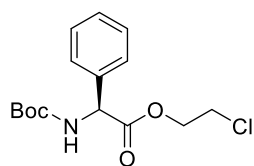

### 2-Chloroethyl (*S*)-2-((*tert*-butoxycarbonyl)amino)-2-phenylacetate (**3n**)

The crude product was purified by flash column chromatography (Petroleum Ether/Ethyl Acetate = 10/1) as colorless solid (43.3 mg, 69%, >99% ee).  $^1\text{H NMR}$  (400 MHz,  $\text{CDCl}_3$ )  $\delta$  7.40 – 7.23 (m, 5H), 5.72 – 5.60 (m, 1H), 5.35 – 5.29 (m, 1H), 4.36 – 4.23 (m, 2H), 3.56 – 3.51 (m, 2H), 1.40 (s, 9H).  $^{13}\text{C NMR}$  (101 MHz,  $\text{CDCl}_3$ )  $\delta$  170.3, 154.3, 135.8, 128.4, 128.0, 126.7, 79.6, 64.4, 57.1, 40.5, 27.7.

**HRMS (ESI<sup>+</sup>) m/z:**  $[\text{M}+\text{Na}]^+$  Calcd for  $\text{C}_{15}\text{H}_{20}\text{ClNNaO}_4$ , 336.0979; Found: 336.0978.

**HPLC** (Chiralpak AD-H column, hexane/<sup>*i*</sup>PrOH = 85/15, flow rate 1.0 mL min<sup>-1</sup>,  $\lambda = 230$  nm):  $t_1 = 9.9$  min,  $t_2 = 13.5$  min.

|                    |                  |
|--------------------|------------------|
| <b>Racemate 3n</b> | <b>Chiral 3n</b> |
|--------------------|------------------|

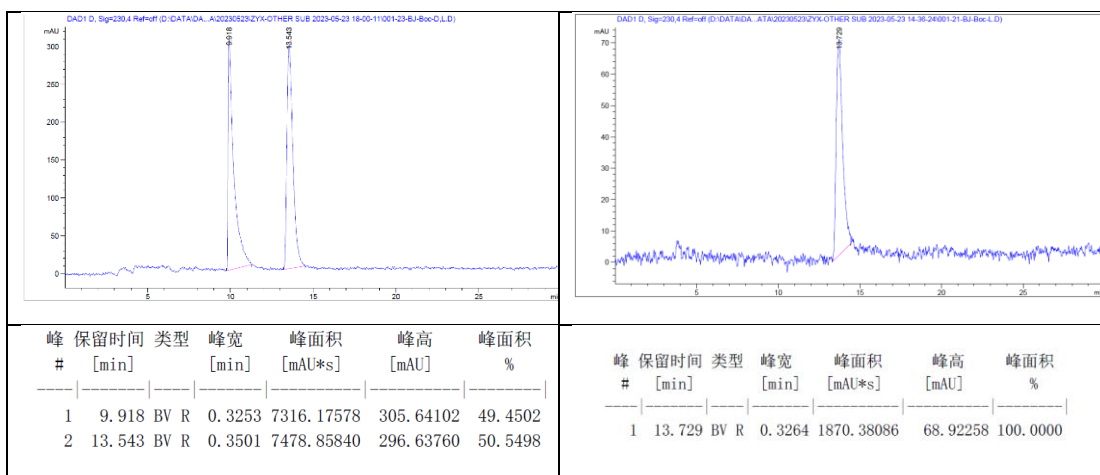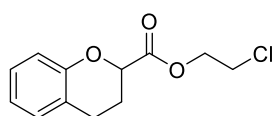

### 2-Chloroethyl chromane-2-carboxylate (3o)<sup>11</sup>

The crude product was purified by flash column chromatography (Petroleum Ether/Ethyl Acetate = 10/1) as yellow oil (37.6 mg, 78%). <sup>1</sup>H NMR (400 MHz, CDCl<sub>3</sub>) δ 7.18 – 7.10 (m, 1H), 7.04 (d, *J* = 7.6 Hz, 1H), 6.97 – 6.85 (m, 2H), 4.79 (dd, *J* = 7.3, 3.7 Hz, 1H), 4.51 – 4.37 (m, 2H), 3.70 (t, *J* = 5.6 Hz, 2H), 2.92 – 2.73 (m, 2H), 2.36 – 2.17 (m, 2H). <sup>13</sup>C NMR (101 MHz, CDCl<sub>3</sub>) δ 170.3, 153.1, 129.2, 127.4, 121.0, 120.7, 116.6, 73.2, 64.4, 41.2, 24.3, 22.9.

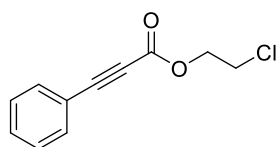

### 2-Chloroethyl 3-phenylpropiolate (3p)

The crude product was purified by flash column chromatography (Petroleum Ether/Ethyl Acetate = 15/1) as yellow oil (14.2 mg, 33%). <sup>1</sup>H NMR (600 MHz, CDCl<sub>3</sub>) δ 7.59 – 7.56 (m, 2H), 7.48 – 7.41 (m, 1H), 7.39 – 7.32 (m, 2H), 4.49 – 4.39 (m, 2H), 3.76 – 3.68 (m, 2H). <sup>13</sup>C NMR (151 MHz, CDCl<sub>3</sub>) δ 153.4, 132.9, 130.8, 128.5, 119.1, 87.2, 79.9, 65.1, 40.9.

HRMS (ESI<sup>+</sup>) *m/z*: [M+Na]<sup>+</sup> Calcd for C<sub>11</sub>H<sub>9</sub>ClNaO<sub>2</sub>, 231.0189; Found: 231.0183.

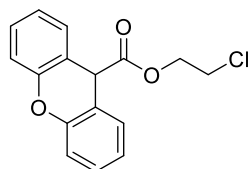

### 2-Chloroethyl 9H-xanthene-9-carboxylate (3q)

The crude product was purified by flash column chromatography (Petroleum Ether/Ethyl Acetate = 20/1) as colorless oil (45.6 mg, 80%).  $^1\text{H NMR}$  (400 MHz,  $\text{CDCl}_3$ )  $\delta$  7.40 – 7.31 (m, 4H), 7.26 – 7.11 (m, 2H), 7.10 (td,  $J = 7.5, 1.2$  Hz, 2H), 5.07 (s, 1H), 4.32 – 4.29 (m, 2H), 3.58 (dd,  $J = 6.1, 5.4$  Hz, 2H).  $^{13}\text{C NMR}$  (101 MHz,  $\text{CDCl}_3$ )  $\delta$  171.3, 151.1, 129.0, 128.9, 123.2, 117.8, 116.8, 64.5, 44.9, 41.1.

**HRMS (ESI<sup>+</sup>) m/z:**  $[\text{M}+\text{Na}]^+$  Calcd for  $\text{C}_{16}\text{H}_{13}\text{ClNaO}_3$ , 311.0451; Found: 311.0453.

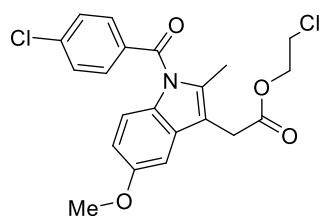

### 2-Chloroethyl 1-(4-chlorobenzoyl)-5-methoxy-2-methyl-1H-indol-3-acetate (3r)

The crude product was purified by flash column chromatography (Petroleum Ether/Ethyl Acetate = 15/1) as yellow oil (23.6 mg, 47%).  $^1\text{H NMR}$  (400 MHz,  $\text{CDCl}_3$ )  $\delta$  7.79 (d,  $J = 8.6$  Hz, 3H), 7.33 (d,  $J = 8.6$  Hz, 2H), 7.08 (d,  $J = 8.7$  Hz, 1H), 6.99 (d,  $J = 2.4$  Hz, 1H), 6.75 (dd,  $J = 8.7, 2.4$  Hz, 1H), 4.51 – 4.46 (m, 2H), 4.44 – 4.39 (m, 2H), 3.80 (s, 3H), 3.68 (s, 2H), 2.33 (s, 3H).  $^{13}\text{C NMR}$  (101 MHz,  $\text{CDCl}_3$ )  $\delta$  169.4, 168.4, 156.2, 146.5, 139.6, 137.2, 133.9, 131.4, 130.9, 130.8, 130.6, 129.3, 126.6, 120.4, 115.1, 114.6, 112.1, 111.1, 101.4, 55.9, 31.7, 13.8.

**HRMS (ESI<sup>+</sup>) (m/z):**  $[\text{M}+\text{Na}]^+$  Calcd for  $\text{C}_{21}\text{H}_{19}\text{Cl}_2\text{NNaO}_4$ , 442.0589; Found: 442.0583.

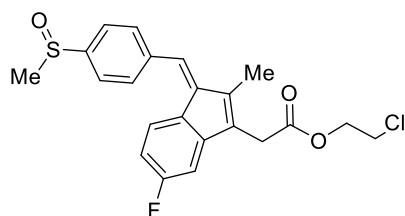

### 2-Chloroethyl-2-(2,5-dimethyl-1-(4-(methylsulfinyl)benzylidene)-1H-inden-3-yl)acetate (3s)

The crude product was purified by flash column chromatography (Petroleum Ether/Ethyl Acetate = 35/1) as brownness oil (55.2 mg, 69%). <sup>1</sup>H NMR (600 MHz, CDCl<sub>3</sub>) δ 7.81 – 7.75 (m, 1H), 7.74 – 7.67 (m, 2H), 7.64 – 7.61 (m, 1H), 7.24 – 7.15 (m, 1H), 7.15 – 7.07 (m, 1H), 3.63 (s, 1H), 3.57 (s, 1H), 2.92 – 2.87 (m, 3H), 2.83 (s, 3H), 2.27 (d, *J* = 17.57 Hz, 3H), 2.20 (s, 3H). <sup>13</sup>C NMR (151 MHz, CDCl<sub>3</sub>) δ 174.6, 164.1, 162.5, 146.6, 144.8, 141.7, 139.8, 138.4, 131.5, 130.3, 129.4, 128.2, 123.9, 123.7, 123.6, 111.9, 110.7, 106.2, 106.1, 43.5, 31.4, 10.5.

**HRMS (ESI<sup>+</sup>) (m/z):** [M+Na]<sup>+</sup> Calcd for C<sub>22</sub>H<sub>20</sub>ClFNaO<sub>3</sub>S, 441.0703; Found: 441.0698.

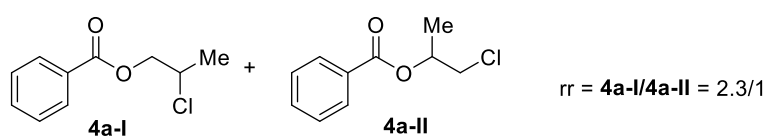

### 2-chloropropyl benzoate (4a-I) and 1-chloropropan-2-yl benzoate (4a-II)<sup>12</sup>

The crude product (obtained as two inseparable regioisomers) was purified by flash column chromatography (Petroleum Ether/Ethyl Acetate = 30/1) as colorless oil (23.9 mg, 60%). <sup>1</sup>H NMR (400 MHz, CDCl<sub>3</sub>) δ 8.18 – 7.92 (m, 2H), 7.63 – 7.54 (m, 1H), 7.49 – 7.42 (m, 2H), 5.43 – 5.30 (m, 0.5H), 4.43 (d, *J* = 5.97 Hz, 1H), 4.39 – 4.24 (m, 0.5H), 3.78 – 3.59 (m, 1H), 1.61 (d, *J* = 6.58 Hz, 2H), 1.47 (d, *J* = 6.37 Hz, 1H). <sup>13</sup>C NMR (101 MHz, CDCl<sub>3</sub>) δ 166.1, 165.8, 133.2, 133.1, 129.7, 129.6, 128.4, 128.3, 70.2, 68.9, 54.0, 47.0, 29.7, 21.6, 17.7.

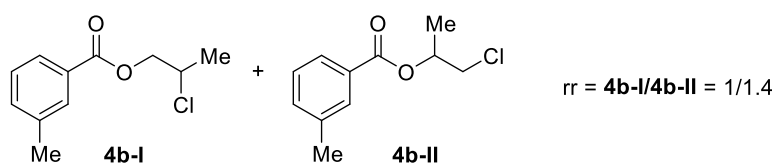

### 2-chloropropyl 3-methylbenzoate (4b-I) and 1-chloropropan-2-yl 3-methylbenzoate (4b-II)

The crude products (obtained as two inseparable regioisomers) were purified by flash column chromatography (Petroleum Ether/Ethyl Acetate = 20/1) as yellow oil (24.5 mg, 57%). <sup>1</sup>H NMR (400 MHz, CDCl<sub>3</sub>) δ 7.87 (t, *J* = 5.6 Hz, 2H), 7.38 – 7.31 (2H), 5.38 – 5.33 (m, 0.5H), 4.51 – 4.47 (m, 1H), 4.43 – 4.1 (m, 0.5H), 3.71 (d, *J* = 5.0 Hz, 1H), 2.41 (s, 3H), 1.60 (d, *J* = 6.6 Hz, 1H), 1.48 (d, *J* = 6.4 Hz, 2H). <sup>13</sup>C NMR (101 MHz,

CDCl<sub>3</sub>)  $\delta$  166.2, 165.9, 138.2, 138.2, 134.0, 133.9, 130.2, 130.2, 129.9, 129.5, 128.3, 128.3, 126.9, 126.8, 77.2, 70.1, 68.9, 54.1, 47.0, 21.6, 21.3, 17.7.

**HRMS (ESI<sup>+</sup>) (m/z):** [M+Na]<sup>+</sup> Calcd for C<sub>11</sub>H<sub>13</sub>ClNaO<sub>2</sub>, 235.0502; Found: 235.0496.

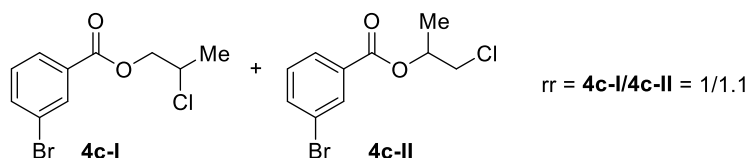

### 2-Chloropropyl 3-bromobenzoate (4c-I) and 1-Chloropropan-2-yl 3-bromobenzoate (4c-II)

The crude products (obtained as two inseparable regioisomers) were purified by flash column chromatography (Petroleum Ether/Ethyl Acetate = 25/1) as yellow oil (28.5 mg, 51%). **<sup>1</sup>H NMR** (400 MHz, CDCl<sub>3</sub>)  $\delta$  8.20 – 8.15 (m, 1H), 8.03 – 7.96 (m, 1H), 7.74 – 7.66 (m, 1H), 7.36 – 7.31 (m, 1H), 5.41 – 5.30 (m, 0.5H), 4.43 (d, *J* = 5.97 Hz, 1H), 4.36 – 4.27 (m, 0.5H), 3.73 – 3.69 (m, 1H), 1.62 – 1.57 (d, *J* = 6.62 Hz, 1H), 1.49 – 1.42 (m, 2H). **<sup>13</sup>C NMR** (101 MHz, CDCl<sub>3</sub>)  $\delta$  164.7, 164.4, 136.2, 136.1, 132.7, 132.6, 131.9, 131.6, 130.0, 129.9, 128.3, 128.2, 122.5, 122.4, 70.7, 69.3, 53.8, 46.8, 21.6, 17.7.

**HRMS (ESI<sup>+</sup>) (m/z):** [M+Na]<sup>+</sup> Calcd for C<sub>10</sub>H<sub>10</sub>BrClNaO<sub>2</sub>, 298.9450; Found: 298.9445.

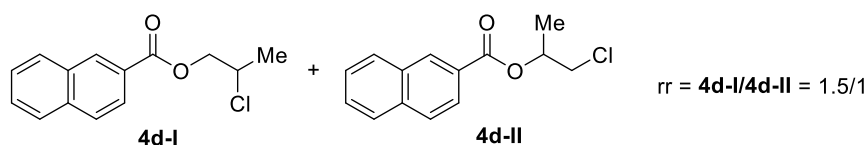

### 2-Chloropropyl 2-naphthoate (4d-I) and 1-Chloropropan-2-yl 2-naphthoate (4d-II)

The crude product (obtained as two inseparable regioisomers) were purified by flash column chromatography (Petroleum Ether/Ethyl Acetate = 25/1) as yellow oil (24.9 mg, 50%). **<sup>1</sup>H NMR** (400 MHz, CDCl<sub>3</sub>)  $\delta$  8.64 (d, *J* = 4.74 Hz, 1H), 8.11 – 8.05 (m, 1H), 7.97 (d, *J* = 7.99 Hz, 1H), 7.92 – 7.86 (m, 2H), 7.63 – 7.52 (m, 2H), 5.49 – 5.36 (m, 0.5H), 4.50 (d, *J* = 6.01 Hz, 1H), 4.38 (m, 0.5H), 3.77 (d, *J* = 5.04 Hz, 1H), 1.65 (d, *J* = 6.64 Hz, 2H), 1.53 (d, *J* = 6.34 Hz, 1H). **<sup>13</sup>C NMR** (101 MHz, CDCl<sub>3</sub>)  $\delta$  166.2, 165.9, 135.7, 135.6, 132.4, 131.3, 131.2, 129.4, 129.3, 128.4, 128.3, 128.2, 128.1, 127.74, 127.73, 127.2, 126.8, 126.7, 126.6, 70.3, 69.0, 54.1, 47.0, 31.4, 30.2, 29.7, 21.6, 17.7.

**HRMS (ESI<sup>+</sup>) (m/z):** [M+Na]<sup>+</sup> Calcd for C<sub>14</sub>H<sub>13</sub>ClNaO<sub>2</sub>, 271.0502; Found: 271.0496.

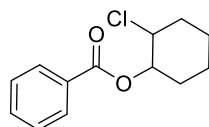

### 2-Chlorocyclohexyl benzoate (4e)<sup>6</sup>

The crude product was purified by flash column chromatography (Petroleum Ether/Ethyl Acetate = 30/1) as yellow oil (27.6 mg, 58%). <sup>1</sup>H NMR (400 MHz, CDCl<sub>3</sub>) δ 8.10 – 7.85 (m, 2H), 7.56 – 7.48 (m, 1H), 7.41 (t, *J* = 7.7 Hz, 2H), 5.08 – 5.00 (m, 1H), 4.03 – 3.96 (m, 1H), 2.31 – 2.14 (m, 2H), 1.82 – 1.63 (m, 3H), 1.53 – 1.39 (m, 2H), 1.39 – 1.27 (m, 1H). <sup>13</sup>C NMR (101 MHz, CDCl<sub>3</sub>) δ 165.3, 132.7, 129.9, 129.4, 128.1, 76.0, 60.3, 34.4, 30.3, 24.1, 22.9.

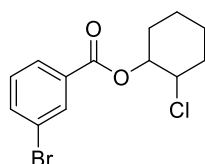

### 2-Chlorocyclohexyl 3-bromobenzoate (4f)<sup>13</sup>

The crude product was purified by flash column chromatography (Petroleum Ether/Ethyl Acetate = 20/1) as colorless oil (31.2 mg, 49%). <sup>1</sup>H NMR (400 MHz, CDCl<sub>3</sub>) δ 8.20 (t, *J* = 3.37 Hz, 1H), 8.02 – 7.99 (m, 1H), 7.71 – 7.65 (m, 1H), 7.33 (t, *J* = 7.89 Hz, 1H), 5.12 – 4.99 (m, 1H), 4.09 – 3.98 (m, 1H), 2.36 – 2.20 (m, 2H), 1.88 – 1.73 (m, 3H), 1.58 – 1.46 (m, 2H), 1.44 – 1.35 (m, 1H). <sup>13</sup>C NMR (101 MHz, CDCl<sub>3</sub>) δ 164.1, 135.8, 132.4, 132.0, 129.8, 128.2, 122.3, 76.8, 60.4, 34.7, 30.6, 24.4, 23.1.

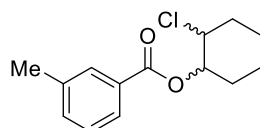

### 2-chlorocyclohexyl 3-methylbenzoate (4g)

The crude product was purified by flash column chromatography (Petroleum Ether/Ethyl Acetate = 30/1) as yellow oil (38.1 mg, 75%). <sup>1</sup>H NMR (400 MHz, CDCl<sub>3</sub>) δ 7.87 (d, *J* = 6.44 Hz, 2H), 7.38 – 7.28 (m, 2H), 5.11 – 4.98 (m, 1H), 4.08 – 3.97 (m, 1H), 2.39 (s, 3H), 2.33 – 2.18 (m, 2H), 1.83 – 1.71 (m,



3H), 1.60 – 1.28 (m, 3H).  $^{13}\text{C}$  NMR (101 MHz,  $\text{CDCl}_3$ )  $\delta$  165.6, 137.9, 133.6, 130.0, 128.1, 126.7, 76.0, 60.4, 34.5, 30.4, 24.2, 23.0, 21.1, 14.2.

HRMS (ESI)  $m/z$ :  $[\text{M}+\text{Na}]^+$  Calcd for  $\text{C}_{14}\text{H}_{17}\text{ClNaO}_2$ , 275.0815; Found: 275.0810.

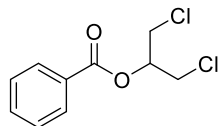

#### 2-Propanol, 1,3-dichloro-, 2-benzoate (4h)<sup>14</sup>

The crude product was purified by flash column chromatography (Petroleum Ether/Ethyl Acetate = 20/1) as yellow oil (33.2 mg, 71%).  $^1\text{H}$  NMR (400 MHz,  $\text{CDCl}_3$ )  $\delta$  8.10 – 8.06 (m, 2H), 7.62 – 7.58 (m, 1H), 7.56 – 7.45 (m, 2H), 5.43 (p,  $J = 5.1$  Hz, 1H), 3.90 (d,  $J = 5.1$  Hz, 4H).  $^{13}\text{C}$  NMR (101 MHz,  $\text{CDCl}_3$ )  $\delta$  165.3, 133.6, 129.9, 129.1, 128.5, 72.0, 42.4.

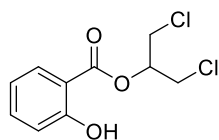

#### 1,3-Dichloropropan-2-yl 2-hydroxybenzoate (4i)<sup>15</sup>

The crude product was purified by flash column chromatography (Petroleum Ether/Ethyl Acetate = 25/1) as colorless oil (31.2 mg, 62%).  $^1\text{H}$  NMR (400 MHz,  $\text{CDCl}_3$ )  $\delta$  10.42 (s, 1H), 7.92 – 7.84 (dd,  $J = 8.0, 1.8$  Hz, 1H), 7.58 – 7.43 (m, 1H), 7.04 – 6.97 (d,  $J = 9.4$  Hz, 1H), 6.96 – 6.85 (m, 1H), 5.50 – 5.43 (m, 1H), 3.91 – 3.85 (d,  $J = 5.2$  Hz, 4H).  $^{13}\text{C}$  NMR (101 MHz,  $\text{CDCl}_3$ )  $\delta$  168.8, 161.9, 136.5, 130.1, 119.5, 117.7, 111.5, 72.4, 42.2.

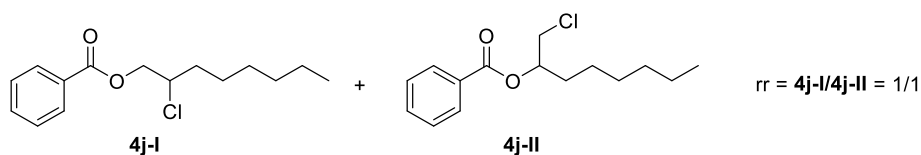

#### 2-Chlorooctyl benzoate (4j-II) and 1-chlorooctan-2-yl benzoate (4j-II)

The crude products (obtained as two inseparable regioisomers) were purified by flash column chromatography (Petroleum Ether/Ethyl Acetate = 30/1) as colorless oil (41.0 mg, 76%).  $^1\text{H}$  NMR (400 MHz,  $\text{CDCl}_3$ )  $\delta$  8.09 – 8.00 (m, 2H), 7.56 – 7.49 (m, 1H),

7.42 (t,  $J = 7.6$  Hz, 2H), 5.32 – 5.21 (m, 0.5H), 4.52 – 4.27 (m, 1.5H), 4.23 – 4.13 (m, 0.5H), 3.78 – 3.65 (m, 0.5H), 1.92 – 1.70 (m, 2H), 1.64 – 1.16 (m, 8H), 0.95 – 0.83 (m, 3H).  $^{13}\text{C}$  NMR (101 MHz,  $\text{CDCl}_3$ )  $\delta$  165.7, 132.9, 132.8, 129.5, 128.2, 128.1, 73.2, 67.8, 59.1, 45.6, 34.5, 31.4, 31.3, 28.8, 28.5, 25.8, 24.8, 22.3, 13.8.

**HRMS (ESI<sup>+</sup>) m/z:**  $[\text{M}+\text{Na}]^+$  Calcd for  $\text{C}_{15}\text{H}_{21}\text{ClNaO}_2$ , 291.1128; Found: 291.1122.

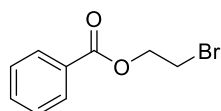

### 2-Bromoethyl benzoate (4k)<sup>16</sup>

The crude product was purified by flash column chromatography (Petroleum Ether/Ethyl Acetate = 15/1) as a yellow oil (24.1 mg, 52%).  $^1\text{H}$  NMR (400 MHz,  $\text{CDCl}_3$ )  $\delta$  8.09 (dd,  $J = 8.2, 1.1$  Hz, 2H), 7.60 – 7.56 (m, 1H), 7.46 (t,  $J = 7.7$  Hz, 2H), 4.62 (t,  $J = 6.1$  Hz, 2H), 3.64 (t,  $J = 6.1$  Hz, 2H).  $^{13}\text{C}$  NMR (101 MHz,  $\text{CDCl}_3$ )  $\delta$  166.0, 133.2, 129.7, 129.5, 128.4, 64.1, 28.8.

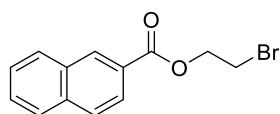

### 2-Bromoethyl 2-naphthoate (4l)<sup>17</sup>

The crude product was purified by flash column chromatography (Petroleum Ether/Ethyl Acetate = 25/1) as colorless oil (41.0 mg, 73%).  $^1\text{H}$  NMR (400 MHz,  $\text{CDCl}_3$ )  $\delta$  8.64 (s, 1H), 8.08 (dd,  $J = 8.6, 1.7$  Hz, 1H), 7.97 (d,  $J = 8.2$  Hz, 1H), 7.91 – 7.87 (m, 2H), 7.63 – 7.53 (m, 2H), 4.69 (t,  $J = 6.1$  Hz, 2H), 3.70 (t,  $J = 6.1$  Hz, 2H).  $^{13}\text{C}$  NMR (101 MHz,  $\text{CDCl}_3$ )  $\delta$  166.2, 135.6, 132.4, 131.3, 129.4, 128.4, 128.2, 127.7, 126.8, 126.7, 125.1, 64.3, 28.8.

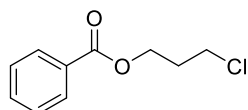

### 1-Propanol, 3-chloro-, 1-benzoate (4m)<sup>18</sup>

The crude product was purified by flash column chromatography (Petroleum Ether/Ethyl Acetate = 30/1) as colorless oil (15.1 mg, 38%).  $^1\text{H}$  NMR (500 MHz,  $\text{CDCl}_3$ )  $\delta$  8.05 – 7.98 (m, 2H), 7.56 (t,  $J = 7.4$  Hz, 1H), 7.44 (t,  $J = 7.8$  Hz, 2H), 4.48 (t,

$J = 6.1$  Hz, 2H), 3.70 (t,  $J = 6.4$  Hz, 2H), 2.24 (p,  $J = 6.2$  Hz, 2H).  $^{13}\text{C}$  NMR (126 MHz,  $\text{CDCl}_3$ )  $\delta$  166.3, 133.0, 130.0, 129.5, 128.4, 61.6, 41.2, 31.7.

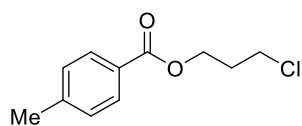

### Benzoic acid, 4-methyl 3-chloropropyl ester (4n)<sup>19</sup>

The crude product was purified by flash column chromatography (Petroleum Ether/Ethyl Acetate = 40/1) as colorless oil (13.4 mg, 31%).  $^1\text{H}$  NMR (500 MHz,  $\text{CDCl}_3$ )  $\delta$  7.91 (d,  $J = 8.2$  Hz, 2H), 7.23 (d,  $J = 8.0$  Hz, 2H), 4.45 (t,  $J = 6.0$  Hz, 2H), 3.69 (t,  $J = 6.4$  Hz, 2H), 2.40 (s, 3H), 2.22 (p,  $J = 6.3$  Hz, 2H).  $^{13}\text{C}$  NMR (126 MHz,  $\text{CDCl}_3$ )  $\delta$  166.4, 143.7, 129.5, 129.0, 127.2, 61.4, 41.3, 31.7, 21.6.

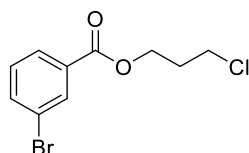

### 3-Chloropropyl-3-bromo-benzoate (4o)

The crude product was purified by flash column chromatography (Petroleum Ether/Ethyl Acetate = 30/1) as colorless oil (10.7 mg, 19%).  $^1\text{H}$  NMR (500 MHz,  $\text{CDCl}_3$ )  $\delta$  8.14 (s, 1H), 7.95 (d,  $J = 7.8$  Hz, 1H), 7.69 – 7.66 (m, 1H), 7.31 (t,  $J = 7.9$  Hz, 1H), 4.47 (t,  $J = 6.0$  Hz, 2H), 3.68 (t,  $J = 6.4$  Hz, 2H), 2.23 (p,  $J = 6.2$  Hz, 2H).  $^{13}\text{C}$  NMR (126 MHz,  $\text{CDCl}_3$ )  $\delta$  164.9, 135.9, 132.5, 131.9, 129.9, 128.1, 122.4, 62.1, 41.1, 31.5.

HRMS (ESI<sup>+</sup>) (m/z):  $[\text{M}+\text{Na}]^+$  Calcd for  $\text{C}_{10}\text{H}_{10}\text{BrClNaO}_2$ , 298.9450; Found: 298.9445.

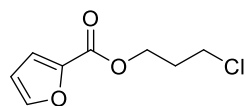

### 3-Chloropropyl 2-furancarboxylate (4p)<sup>20</sup>

The crude product was purified by flash column chromatography (Petroleum Ether/Ethyl Acetate = 30/1) as colorless oil (14.5 mg, 39%).  $^1\text{H}$  NMR (500 MHz,  $\text{CDCl}_3$ )  $\delta$  7.56 (d,  $J = 1.0$  Hz, 1H), 7.16 (dd,  $J = 3.5, 0.9$  Hz, 1H), 6.49 (dd,  $J = 3.5, 1.7$

Hz, 1H), 4.43 (t,  $J = 6.1$  Hz, 2H), 3.65 (t,  $J = 6.4$  Hz, 2H), 2.19 (p,  $J = 6.3$  Hz, 2H).  $^{13}\text{C}$  NMR (126 MHz,  $\text{CDCl}_3$ )  $\delta$  158.43, 146.36, 144.36, 118.03, 111.80, 61.51, 41.03, 31.56.

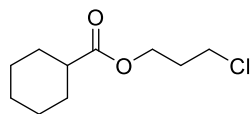

### 3-Chloropropyl cyclohexanecarboxylate (4q)<sup>21</sup>

The crude product was purified by flash column chromatography (Petroleum Ether/Ethyl Acetate = 30/1) as colorless oil (16.1 mg, 39%).  $^1\text{H}$  NMR (500 MHz,  $\text{CDCl}_3$ )  $\delta$  4.18 (t,  $J = 6.1$  Hz, 2H), 3.58 (t,  $J = 6.5$  Hz, 2H), 2.27 – 2.25 (m, 1H), 2.06 (p,  $J = 6.3$  Hz, 2H), 1.87 (dd,  $J = 13.2, 3.8$  Hz, 2H), 1.75 – 1.69 (m, 2H), 1.64 – 1.59 (m, 1H), 1.45 – 1.36 (m, 2H), 1.30 – 1.15 (m, 3H).  $^{13}\text{C}$  NMR (126 MHz,  $\text{CDCl}_3$ )  $\delta$  175.9, 60.7, 43.1, 41.2, 31.6, 28.9, 25.6, 25.3.

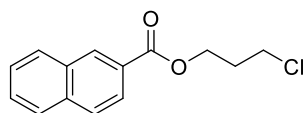

### 3-Chloropropyl-2-naphthalenecarboxylate (4r)

The crude product was purified by flash column chromatography (Petroleum Ether/Ethyl Acetate = 30/1) as a colorless oil (21.1 mg, 42%).  $^1\text{H}$  NMR (500 MHz,  $\text{CDCl}_3$ )  $\delta$  8.60 (d,  $J = 1.6$  Hz, 1H), 8.06 (dd,  $J = 8.5, 1.7$  Hz, 1H), 7.96 (d,  $J = 8.6$  Hz, 1H), 7.89 (d,  $J = 8.7$  Hz, 2H), 7.64 – 7.48 (m, 2H), 4.55 (t,  $J = 6.0$  Hz, 2H), 3.75 (t,  $J = 6.4$  Hz, 2H), 2.29 (p,  $J = 6.2$  Hz, 2H).  $^{13}\text{C}$  NMR (126 MHz,  $\text{CDCl}_3$ )  $\delta$  166.5, 135.5, 132.4, 131.0, 129.3, 128.3, 128.2, 127.7, 127.2, 126.7, 125.1, 61.8, 41.3, 31.8.

HRMS (ESI<sup>+</sup>) (m/z):  $[\text{M}+\text{Na}]^+$  Calcd for  $\text{C}_{14}\text{H}_{13}\text{ClNaO}_2$ , 271.0502; Found: 271.0496.

## 5. References

- (1) Qu, E.; Li, S.; Bai, J.; Zheng, Y.; Li, W., Nickel-Catalyzed Reductive Cross-Coupling of N-Acyl and N-Sulfonyl Benzotriazoles with Diverse Nitro Compounds: Rapid Access to Amides and Sulfonamides. *Org Lett* **2022**, *24*, 58-63.
- (2) Khatib, M. E.; Elagawany, M.; Çalışkan, E.; Davis, E. F.; Faidallah, H. M.; El-feky, S. A.; Katritzky, A. R., Total Synthesis of Cyclic Heptapeptide Rolloamide B. *Chem. Commun.* **2013**, *49*, 2631-2633.
- (3) Liu, K.; Song, Y.-F.; Gao, Y.; Luo, J.-Q.; Jia, Y.-X., NiH-catalyzed dearomative hydroalkylation of

- indoles. *Chemical Communications* **2022**, *58*, 5893-5896.
- (4) Guangrong Meng, P. L., and Michal Szostak, A General Method for Two-Step Transamidation of Secondary Amides Using Commercially Available, Air- and Moisture-Stable Palladium/NHC (N-Heterocyclic Carbene) Complexes. *Org Lett* **2017**, *19*, 2158-2161.
- (5) Zou, X. L. a. G., Acylative Suzuki coupling of amides: acyl-nitrogen activation via synergy of independently modifiable activating groups. *Chem Commun (Camb)* **2015**, *51*, 5089-5092.
- (6) Lin, F.; Feng, Q.; Cui, X. L.; Song, Q. L., Synthesis of Esters from Aldehydes or Carboxylic Acids with Dichloromethane, Dichloroethane or Dichloropropane under Mild Conditions. *RSC Adv* **2013**, *3*, 20246-20253.
- (7) Ren, L. H.; Wang, L. Y.; Lv, Y.; Li, G. S.; Gao, S., An Effective Method for the Construction of Esters Using Cs<sub>2</sub>CO<sub>3</sub> as Oxygen Source. *Org. Lett.* **2015**, *17*, 5172-5175.
- (8) Jiang, H.; Zhang, Y.; Xiong, W.; Cen, J.; Wang, L.; Cheng, R.; Qi, C.; Wu, W., A Three-Phase Four-Component Coupling Reaction: Selective Synthesis of o-Chloro Benzoates by KCl, Arynes, CO<sub>2</sub>, and Chloroalkanes. *Org Lett* **2019**, *21*, 345-349.
- (9) Chen, H.-H.; Wang, G.-Z.; Han, J.; Xu, M.-Y.; Zhao, Y.-Q.; Xu, H.-J., Copper-catalyzed C(sp<sup>3</sup>)-O cross-coupling of unactivated alkyl halides with organic peroxides. *Tetrahedron* **2014**, *70*, 212-217.
- (10) Tortoreto, C.; Rackl, D.; Davies, H. M., Metal-Free C-H Functionalization of Alkanes by Aryldiazoacetates. *Org Lett* **2017**, *19*, 770-773.
- (11) Guan, Y.; Buivydas, T. A.; Lalis, R. F.; Attard, J. W.; Ali, R.; Stern, C.; Hadad, C. M.; Mattson, A. E., Robust, Enantioselective Construction of Challenging, Biologically Relevant Tertiary Ether Stereocenters. *ACS Catalysis* **2021**, *11*, 6325-6333.
- (12) Maeno, Z.; Yamada, S.; Mitsudome, T.; Mizugaki, T.; Jitsukawa, K., Depolymerization of Polyethers to Chloroesters Using Heterogeneous Proton-exchanged Montmorillonite Catalyst. *ChemistrySelect* **2016**, *1*, 201-204.
- (13) Srebnik, M., Potassium Bromide/m-Chloroperbenzoic Acid/18-Crown-6. A Convenient Reagent for the Preparation of trans-1,2-Bromocarboxylates. *Synthetic Communications* **1989**, *19*, 197-205.
- (14) Shibata, I.; Baba, A.; Matsuda, H., Regioselective Ring Cleavage of Oxiranes Catalyzed By Organotin Halide-Triphenylphosphine Complex. *Tetrahedron Lett.* **1986**, *27*, 3021-3024.
- (15) Escriba, M.; Eras, J.; Duran, M.; Simon, S.; Butchosa, C.; Villorbina, G.; Balcells, M.; Canela, R., From glycerol to chlorohydrin esters using a solvent-free system. Microwave irradiation versus conventional heating. *Tetrahedron* **2009**, *65*, 10370-10376.
- (16) Wiseman, R. L.; Johnson, S. M.; Kelker, M. S.; Foss, T.; Wilson, I. A.; Kelly, J. W., Kinetic Stabilization of an Oligomeric Protein by a Single Ligand Binding Event. *J. Am. Chem. Soc.* **2005**, *127*, 5540-5551.
- (17) Aoyama, T.; Takido, T.; Kodomari, M., One-pot synthesis of omega-bromoesters from aromatic aldehydes and diols using pyridinium hydrobromide perbromide. *Tetrahedron Lett.* **2005**, *46*, 1989-1992.
- (18) Tang, Y.; Feng, C.; Yang, W.; Ji, M.; Wang, W.; Chen, J., Synthesis of chloroesters by the reaction of ethers with acyl chlorides catalyzed by ZnO. *Chemical Papers* **2020**, *75*, 1-8.

- (19) Caitlan E. Ayala, A. V., Alex L. Nguyen, Gregory T. McCandless, and Rendy Kartika, Chlorination of Aliphatic Primary Alcohols via Triphosgene Triethylamine Activation. *Org Lett* **2012**, *14*, 3676-3679.
- (20) Aragon, J.; Sun, S.; Pascual, D.; Jaworski, S.; Lloret-Fillol, J., Photoredox Activation of Inert Alkyl Chlorides for the Reductive Cross-Coupling with Aromatic Alkenes. *Angew Chem Int Ed* **2022**, *61*, e202114365.
- (21) Lu, L.; Shi, R.; Liu, L.; Yan, J.; Lu, F.; Lei, A., Oxidative Alkane C-H Alkoxyacylation. *Chemistry Europe* **2016**, *22*, 14484-14488.

## 6. Copies of NMR Spectra

7.56  
7.54  
7.54  
7.48  
7.46  
7.44  
7.42  
7.42  
7.22  
7.20  
7.02

-4.07

3.13  
3.11  
3.09

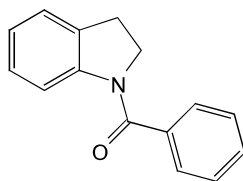

**1a-S<sub>1</sub>**

<sup>1</sup>H NMR (400 MHz, CDCl<sub>3</sub>)

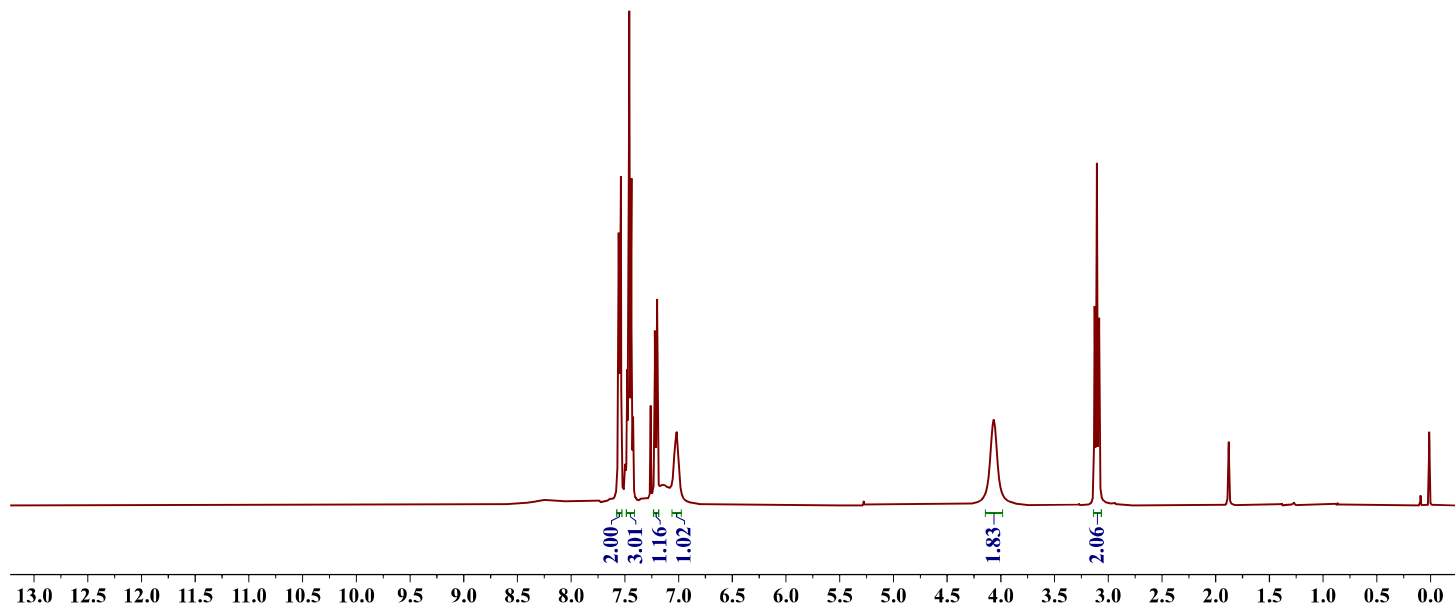

-168.85

142.56  
136.93  
130.19  
128.48  
127.13  
127.00  
124.80  
123.83

77.32  
77.00  
76.68

-50.49

-28.00

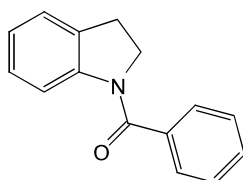

**1a-S<sub>1</sub>**

<sup>13</sup>C NMR (101 MHz, CDCl<sub>3</sub>)

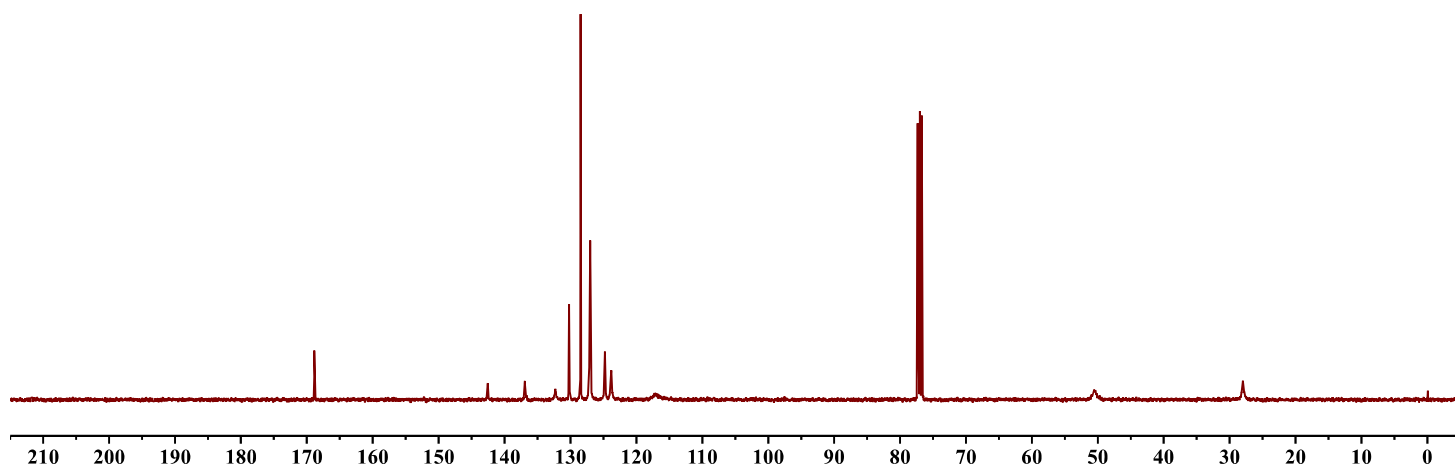

8.46  
8.44  
7.76  
7.76  
7.74  
7.74  
7.64  
7.62  
7.62  
7.60  
7.60  
7.59  
7.55  
7.53  
7.52  
7.43  
7.43  
7.41  
7.40  
7.39  
7.36  
7.36  
7.34  
7.32  
7.31  
7.26  
6.64  
6.63

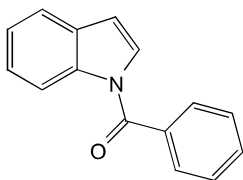

**1a-S<sub>2</sub>**

<sup>1</sup>H NMR (400 MHz, CDCl<sub>3</sub>)

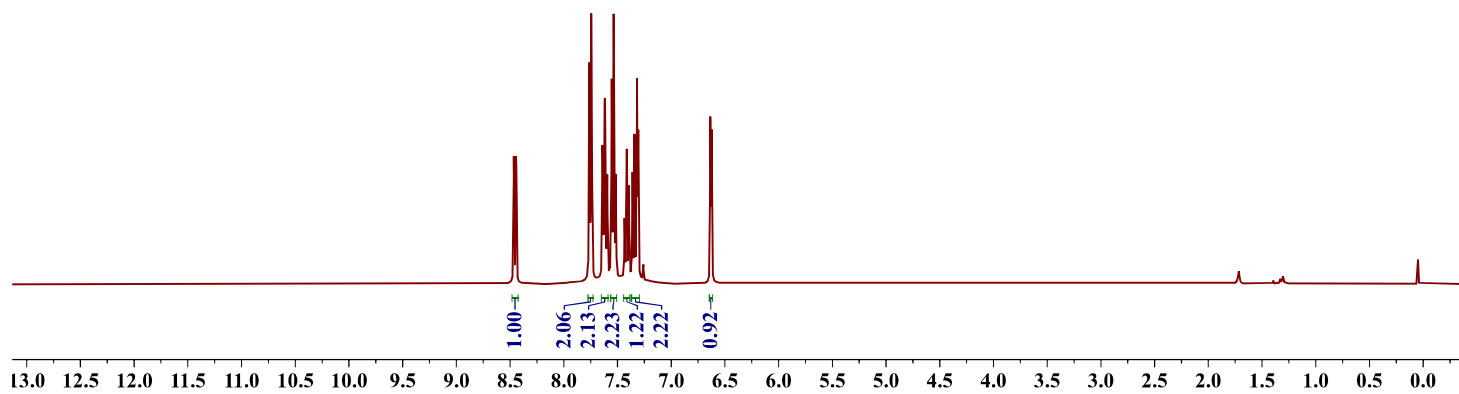

168.60  
135.97  
134.53  
131.78  
130.72  
129.07  
128.50  
127.51  
124.83  
123.86  
120.81  
116.33  
108.47  
77.32  
77.00  
76.68

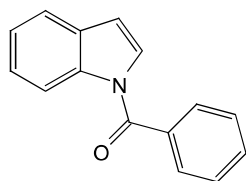

**1a-S<sub>2</sub>**

<sup>13</sup>C NMR (101 MHz, CDCl<sub>3</sub>)

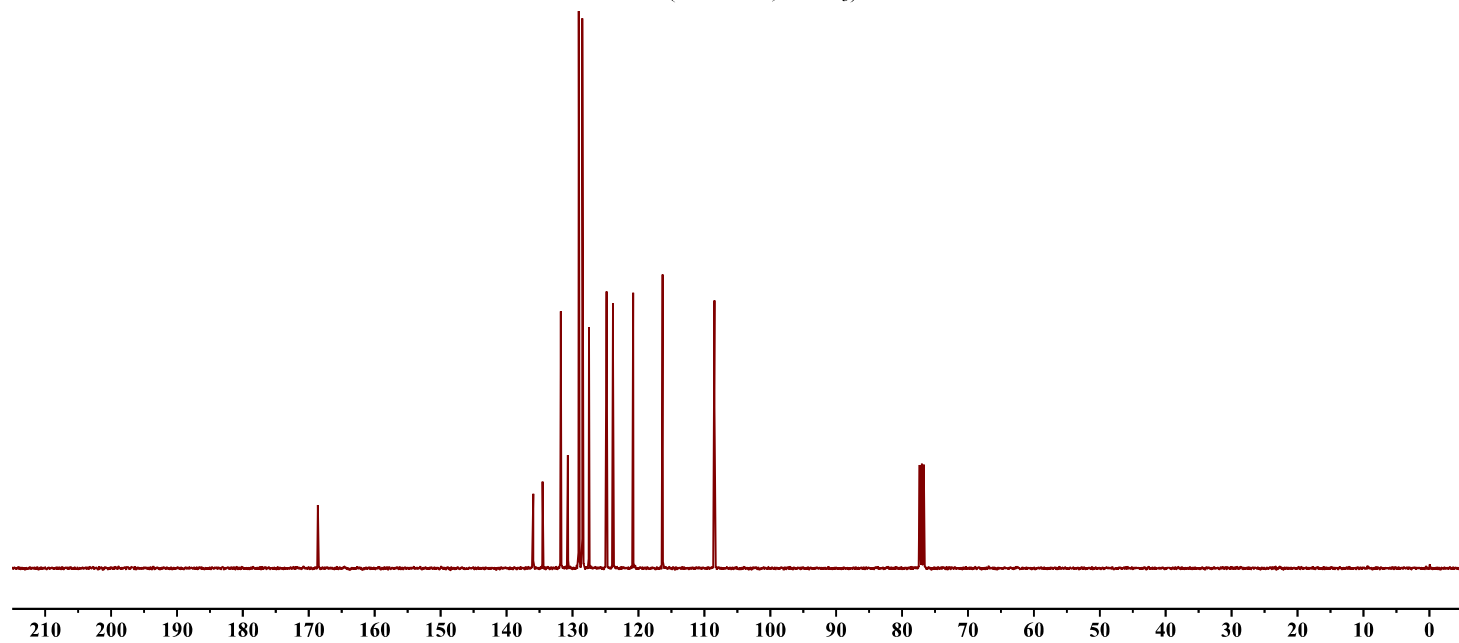



8.24  
8.21  
8.21  
8.20  
8.20  
8.19  
7.87  
7.86  
7.86  
7.85  
7.84  
7.82  
7.81  
7.80  
7.72  
7.70  
7.68  
7.62  
7.60  
7.58  
7.48  
7.47  
7.46  
7.46  
7.45  
7.45  
7.44  
7.44  
7.42  
7.42  
7.26

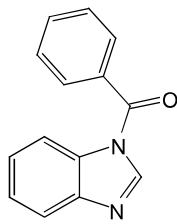

**1a-S<sub>3</sub>**

<sup>1</sup>H NMR (400 MHz, CDCl<sub>3</sub>)

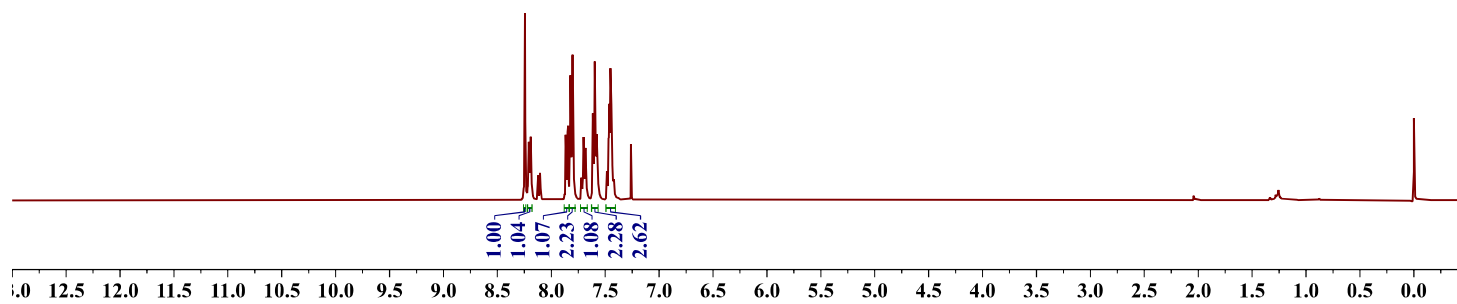

166.99  
143.85  
143.06  
133.14  
132.80  
132.06  
129.47  
128.99  
125.73  
125.24  
120.44  
115.41  
77.00

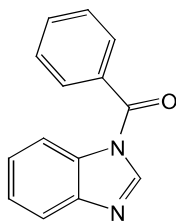

**1a-S<sub>3</sub>**

<sup>13</sup>C NMR (101 MHz, CDCl<sub>3</sub>)

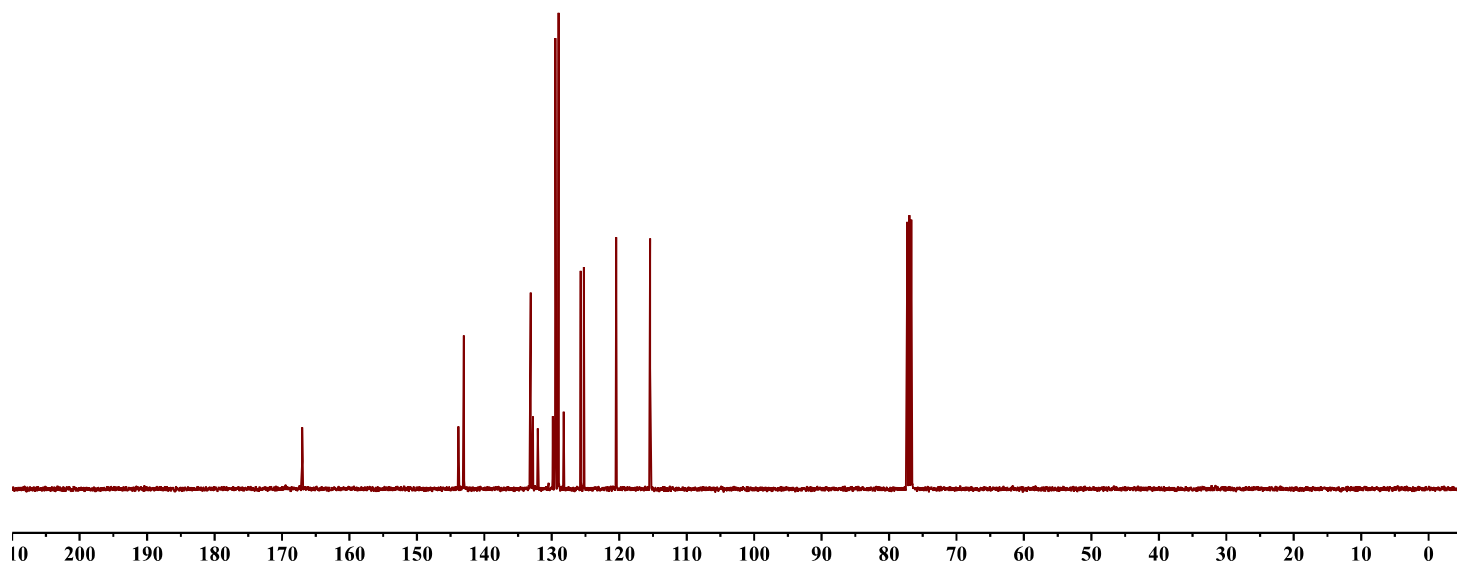

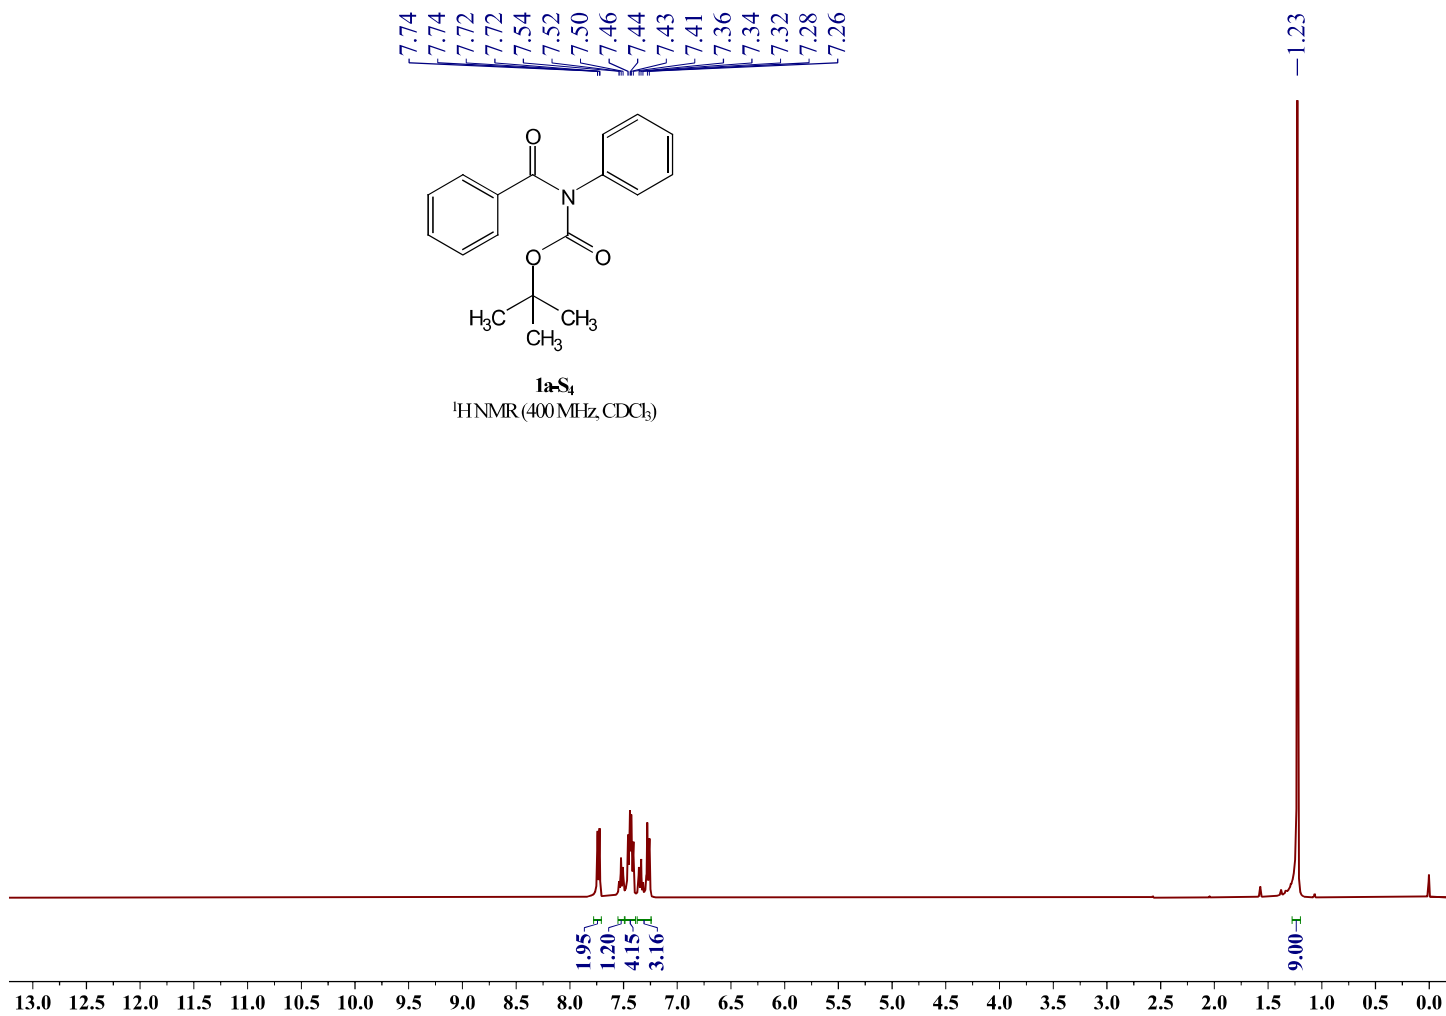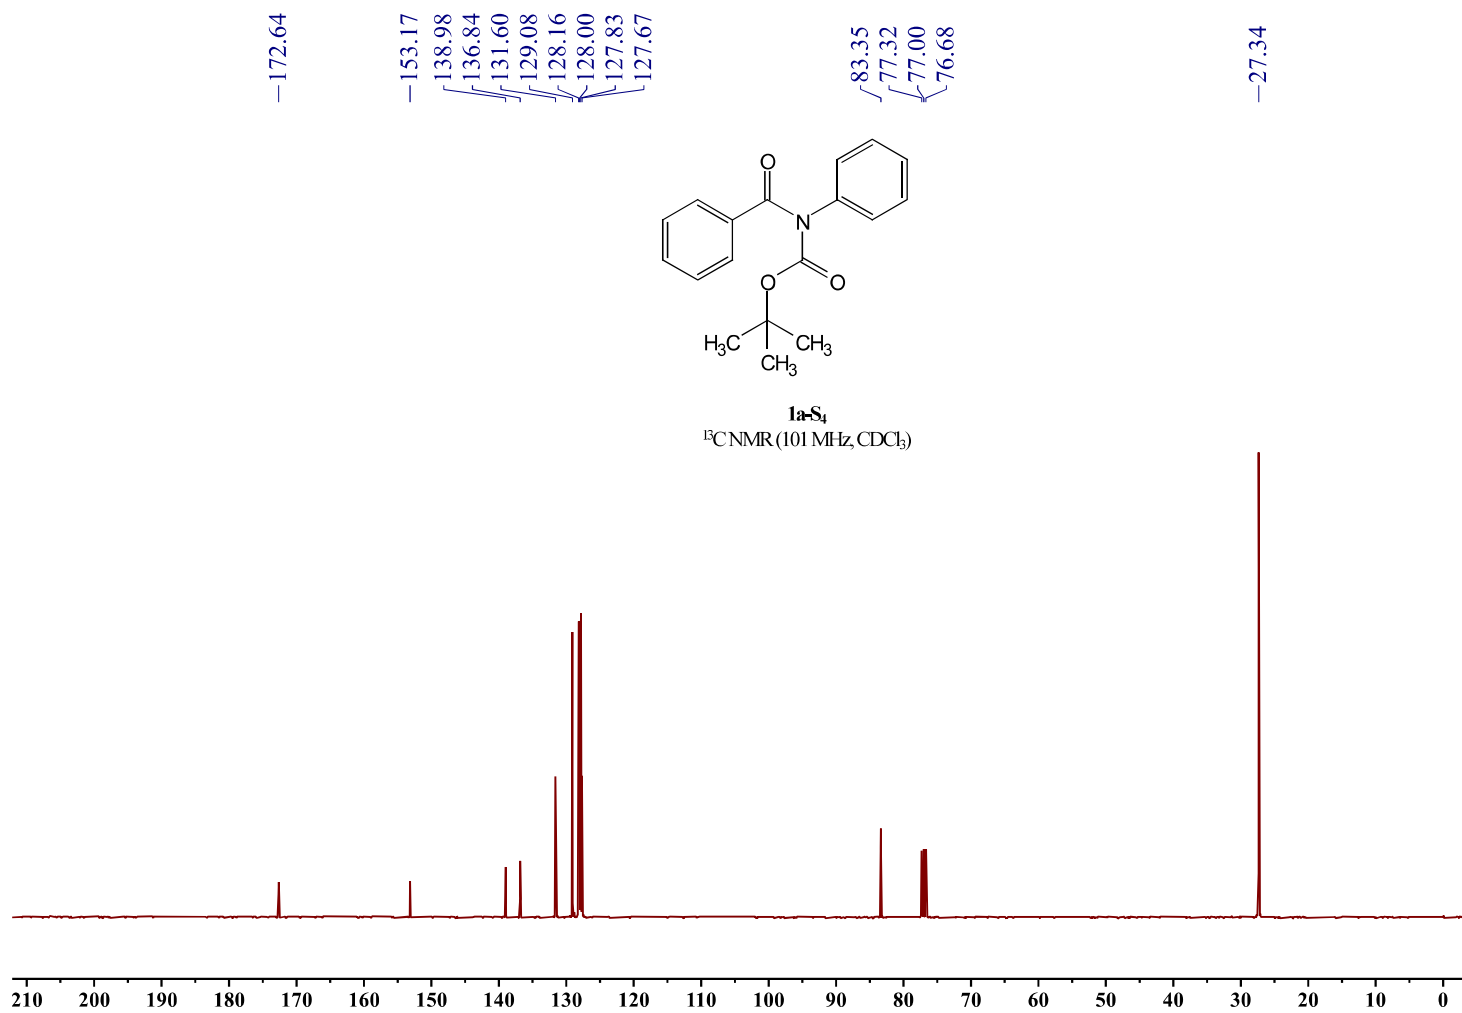

7.88  
7.85  
7.48  
7.46  
7.35  
7.33  
7.31  
7.31  
7.31  
7.30  
7.29  
7.26  
7.24  
7.23  
7.22  
7.21  
7.20  
7.19  
7.18  
7.17

-2.47

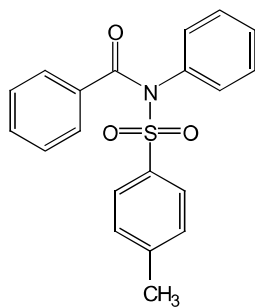

**1a-S<sub>5</sub>**  
<sup>1</sup>H NMR (400 MHz, CDCl<sub>3</sub>)

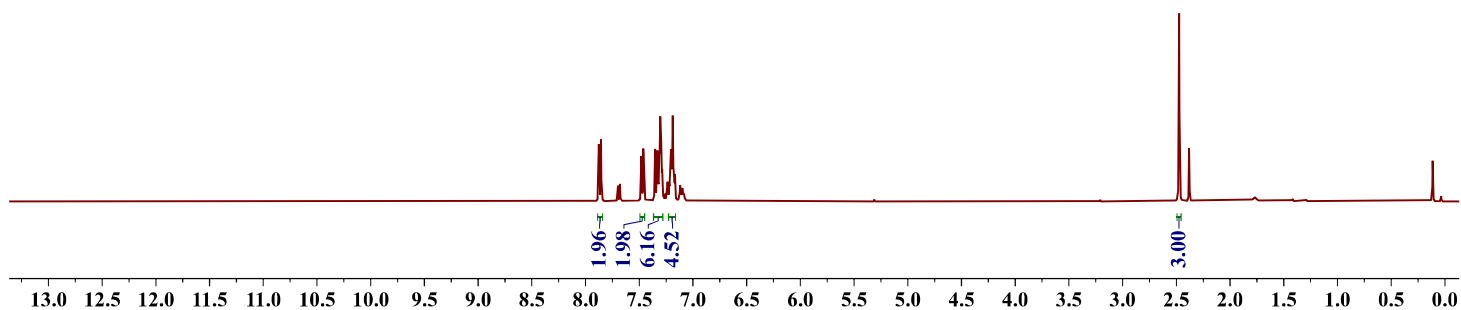

169.87  
144.80  
137.31  
136.58  
135.09  
133.55  
131.69  
130.32  
129.52  
129.39  
129.38  
129.19  
129.17  
129.04  
128.99  
127.92  
127.19  
125.13  
121.50  
77.32  
77.00  
76.68

-21.64

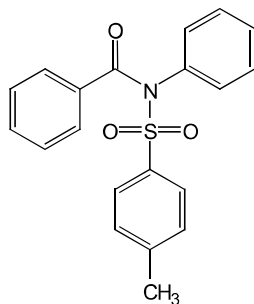

**1a-S<sub>5</sub>**  
<sup>13</sup>C NMR (101 MHz, CDCl<sub>3</sub>)

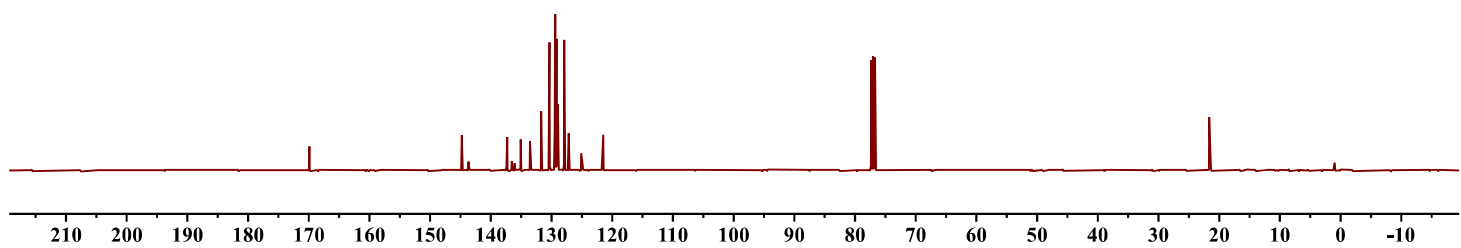

8.08  
8.08  
8.06  
8.06  
7.59  
7.58  
7.58  
7.56  
7.55  
7.55  
7.54  
7.46  
7.44  
7.43  
7.42  
7.26  
4.66  
4.57  
4.56  
4.54  
3.82  
3.80  
3.79

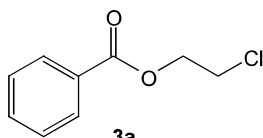

<sup>1</sup>H NMR (400 MHz, CDCl<sub>3</sub>)

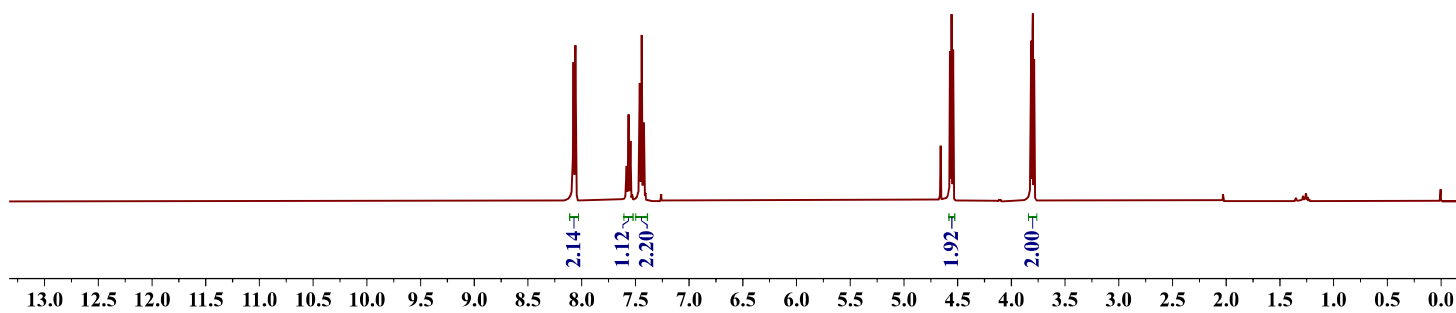

166.00  
133.14  
129.59  
129.48  
128.31  
77.00  
64.32  
41.59

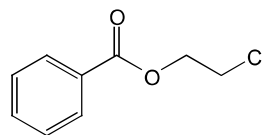

<sup>13</sup>C NMR (101 MHz, CDCl<sub>3</sub>)

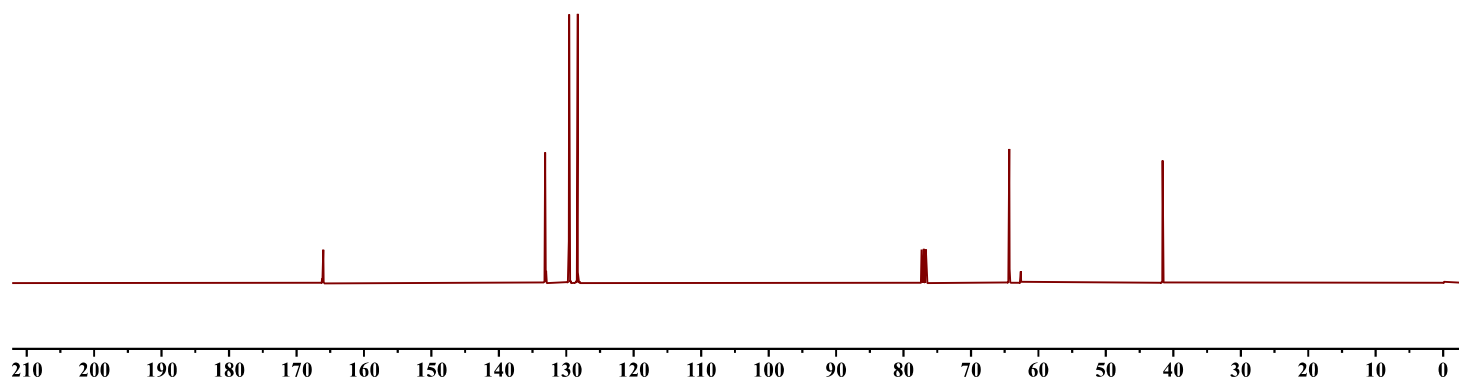

7.80  
7.79  
7.44  
7.42  
7.41  
7.26  
6.93  
6.91  
4.49  
4.48  
4.47  
3.84  
3.75  
3.74  
3.73

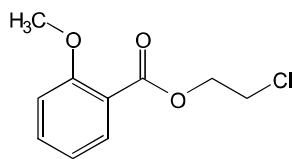

**3b**

<sup>1</sup>H NMR (600 MHz, CDCl<sub>3</sub>)

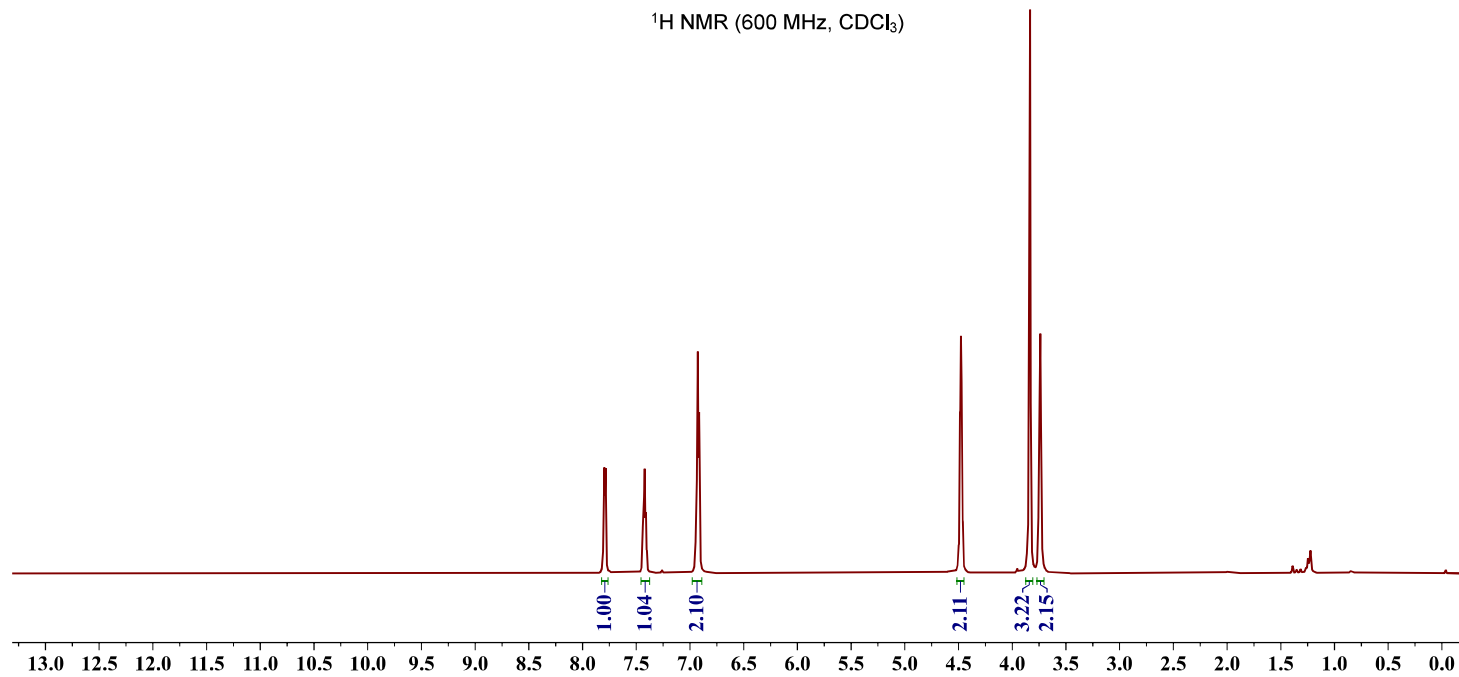

165.21  
159.15  
133.63  
131.46  
119.86  
119.11  
111.86  
77.21  
77.00  
76.79  
63.97  
55.69  
41.50

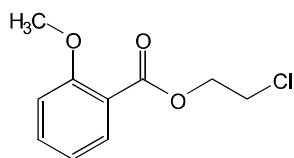

**3b**

<sup>13</sup>C NMR (151 MHz, CDCl<sub>3</sub>)

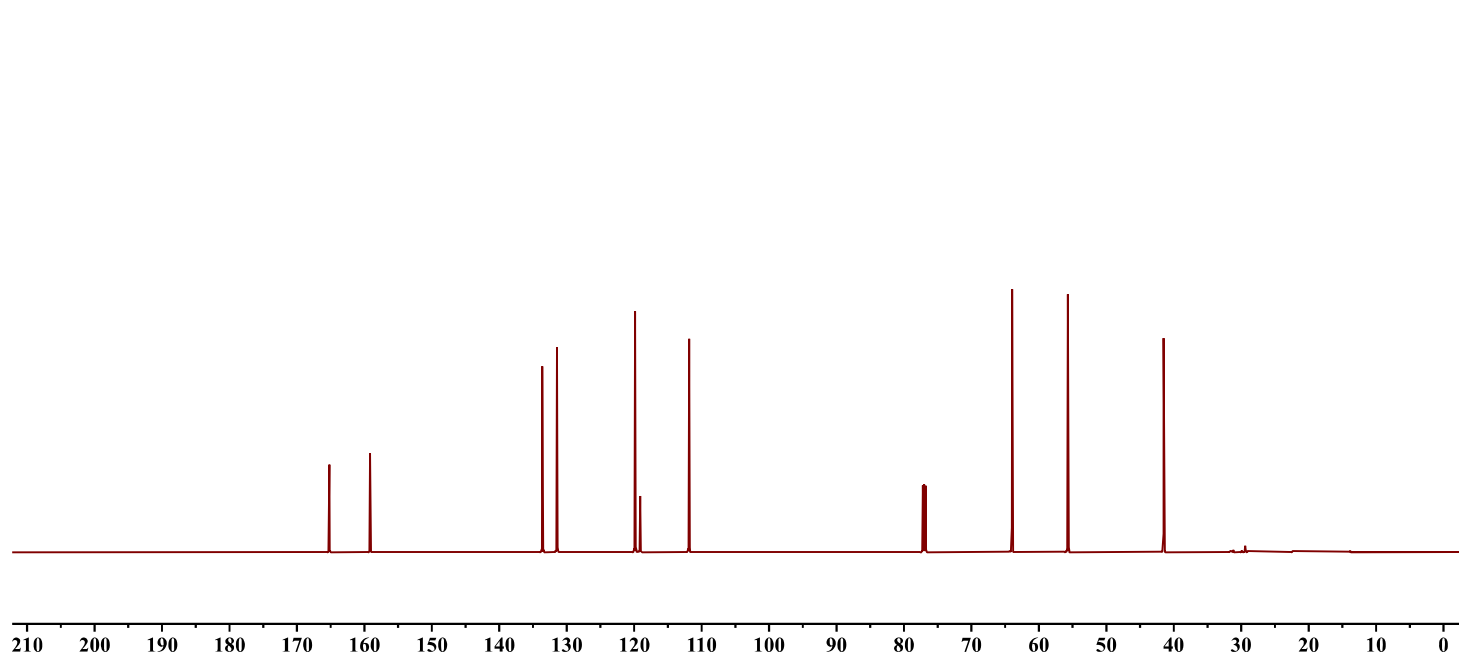

7.89  
7.89  
7.87  
7.87  
7.58  
7.57  
7.56  
7.55  
7.54  
7.53  
7.46  
7.45  
7.44  
7.43  
7.43  
7.42  
7.42  
7.41  
7.40  
7.40  
7.39  
7.39  
7.38  
7.38  
7.37  
7.33  
7.33  
7.32  
7.32  
7.31  
7.31  
7.26  
4.30  
4.29  
4.27  
3.40  
3.39  
3.37

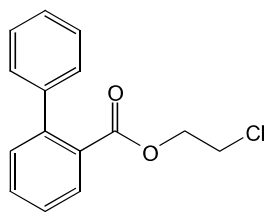

**3c**  
<sup>1</sup>H NMR (400 MHz, CDCl<sub>3</sub>)

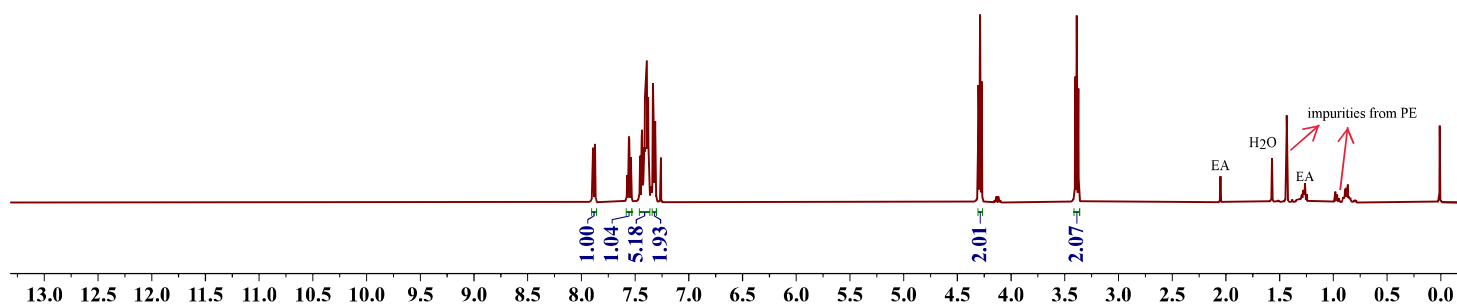

-167.85  
142.57  
141.21  
131.35  
130.56  
130.12  
129.79  
128.19  
127.89  
127.11  
127.06  
-77.00  
-64.16  
-40.82

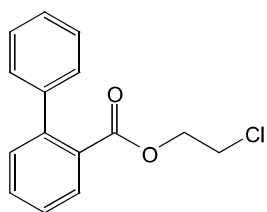

**3c**  
<sup>13</sup>C NMR (101 MHz, CDCl<sub>3</sub>)

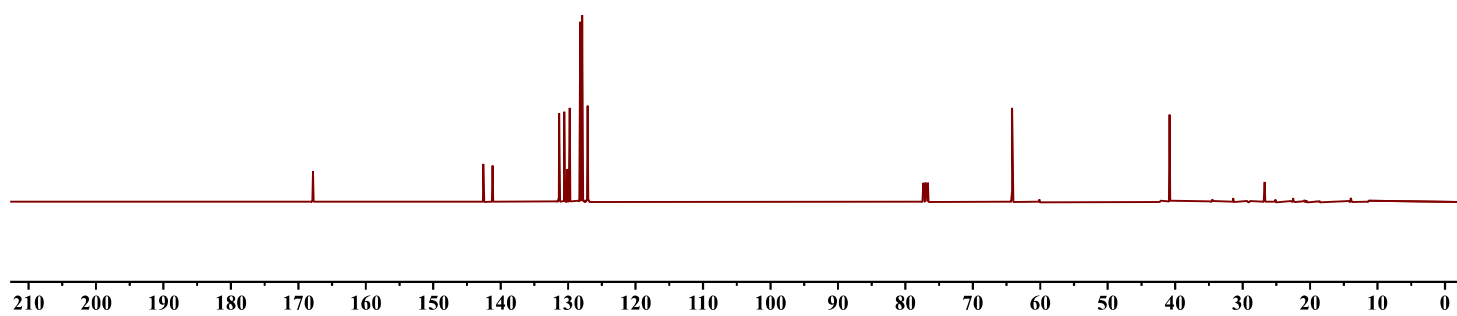

7.94  
7.93  
7.86  
7.85  
7.44  
7.43  
7.38  
7.37  
7.35  
7.34  
7.31  
7.30  
7.29  
7.26  
7.26  
4.54  
4.53  
4.52  
3.79  
3.78  
3.77  
-2.37

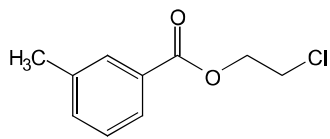

**3d**

<sup>1</sup>H NMR (600 MHz, CDCl<sub>3</sub>)

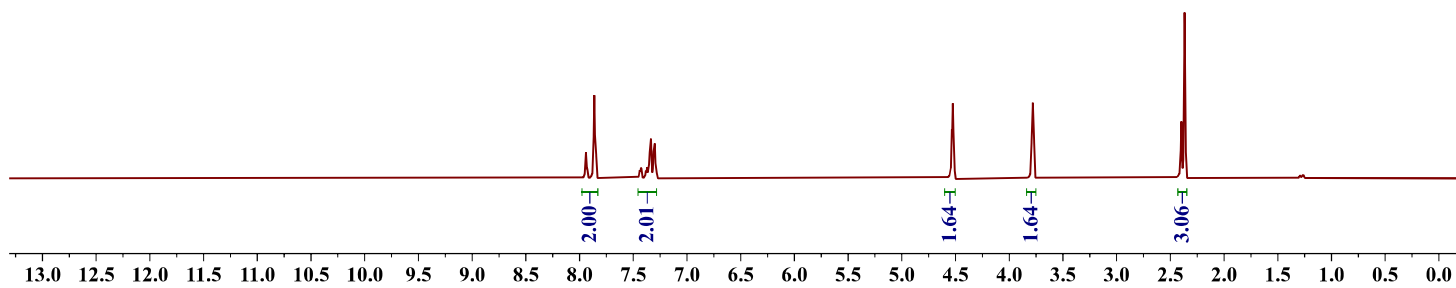

-165.97  
137.96  
133.74  
129.95  
129.34  
128.07  
126.61  
77.21  
77.00  
76.78  
-64.14  
-41.48  
-20.94

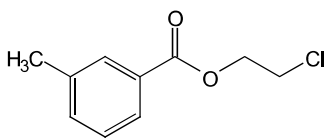

**3d**

<sup>13</sup>C NMR (151 MHz, CDCl<sub>3</sub>)

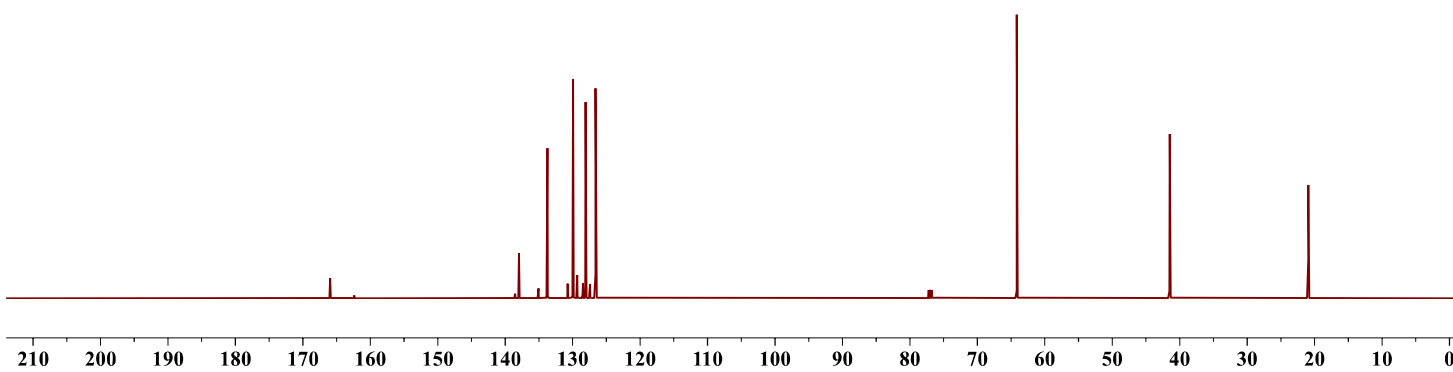

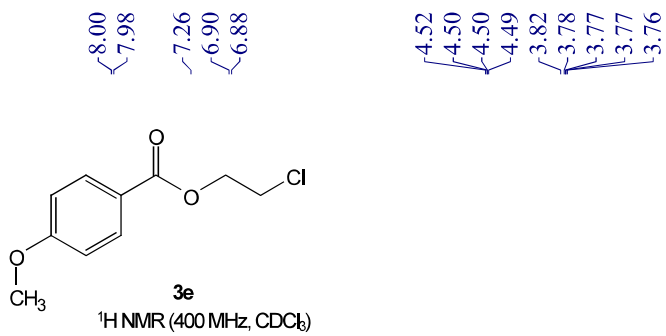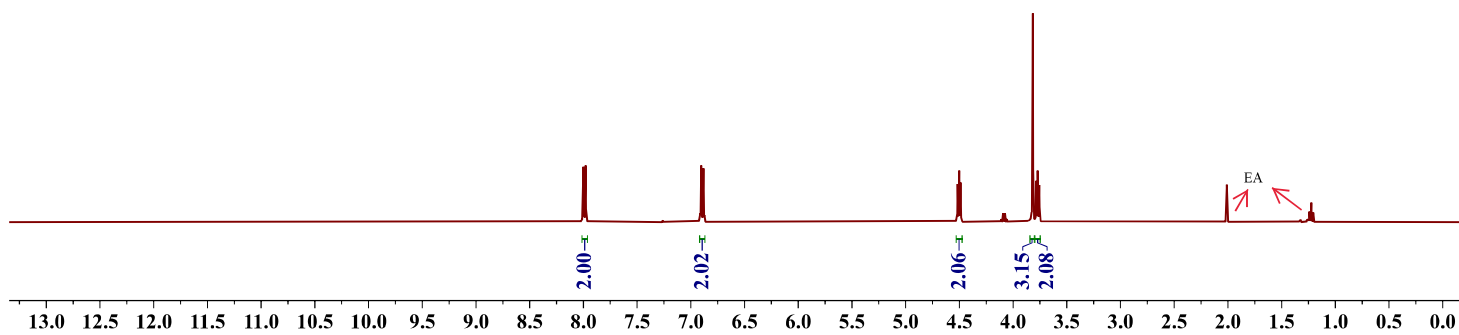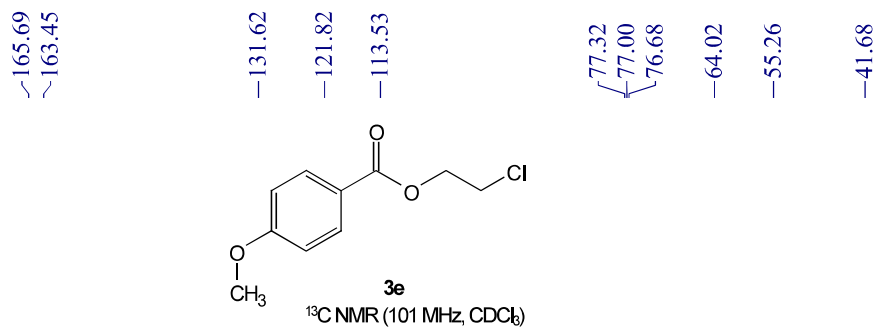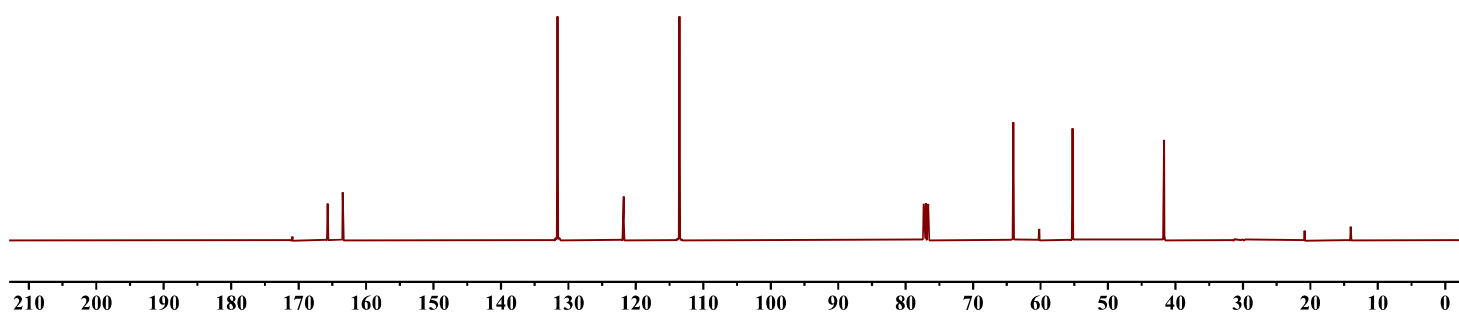



8.16  
8.14  
7.69  
7.67  
7.28

4.61  
4.60  
4.60  
4.60  
4.59  
3.84  
3.83  
3.83  
3.82

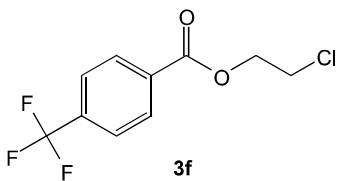

<sup>1</sup>H NMR (400 MHz, CDCl<sub>3</sub>)

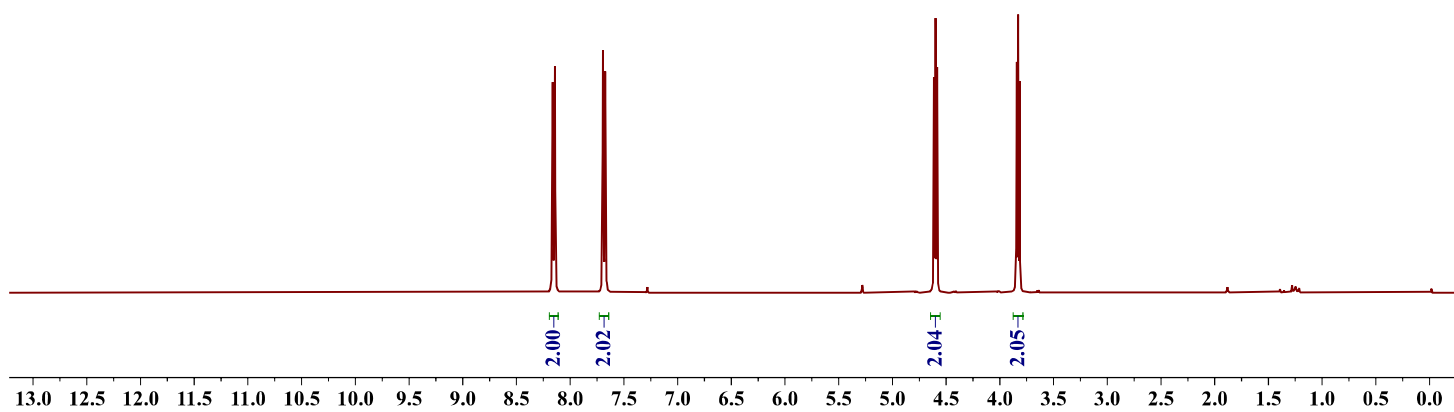

164.80

135.01  
134.69  
134.36  
134.04  
132.78  
132.76  
130.01  
125.39  
125.35  
125.31  
125.28  
124.86  
122.15

77.32  
77.00  
76.68

64.81

41.42

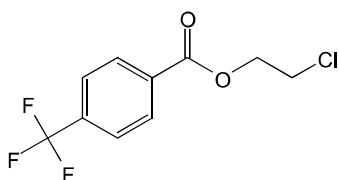

<sup>13</sup>C NMR (101 MHz, CDCl<sub>3</sub>)

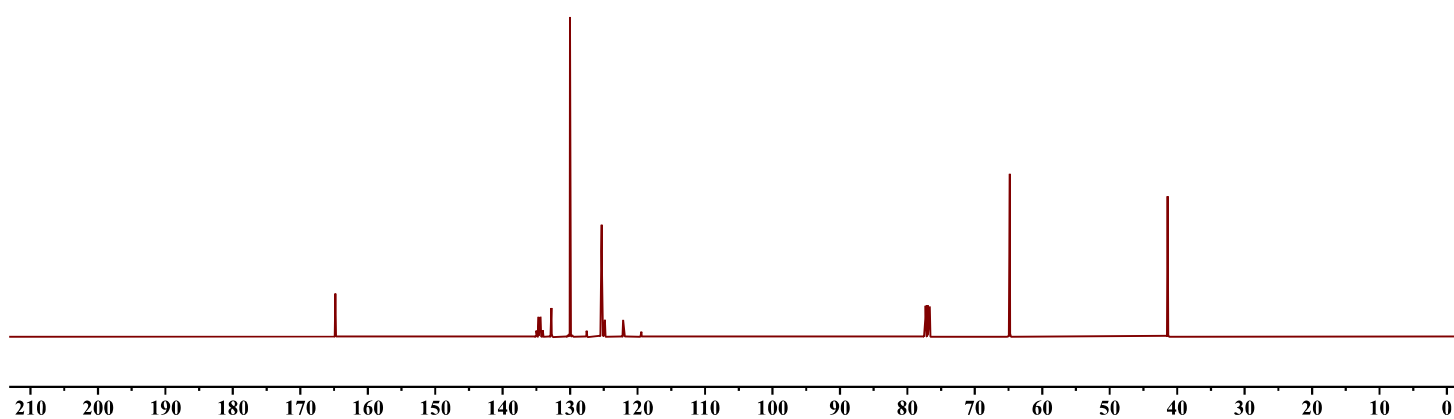

--63.29

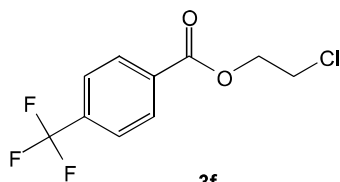

<sup>19</sup>F NMR (376 MHz, CDCl<sub>3</sub>)

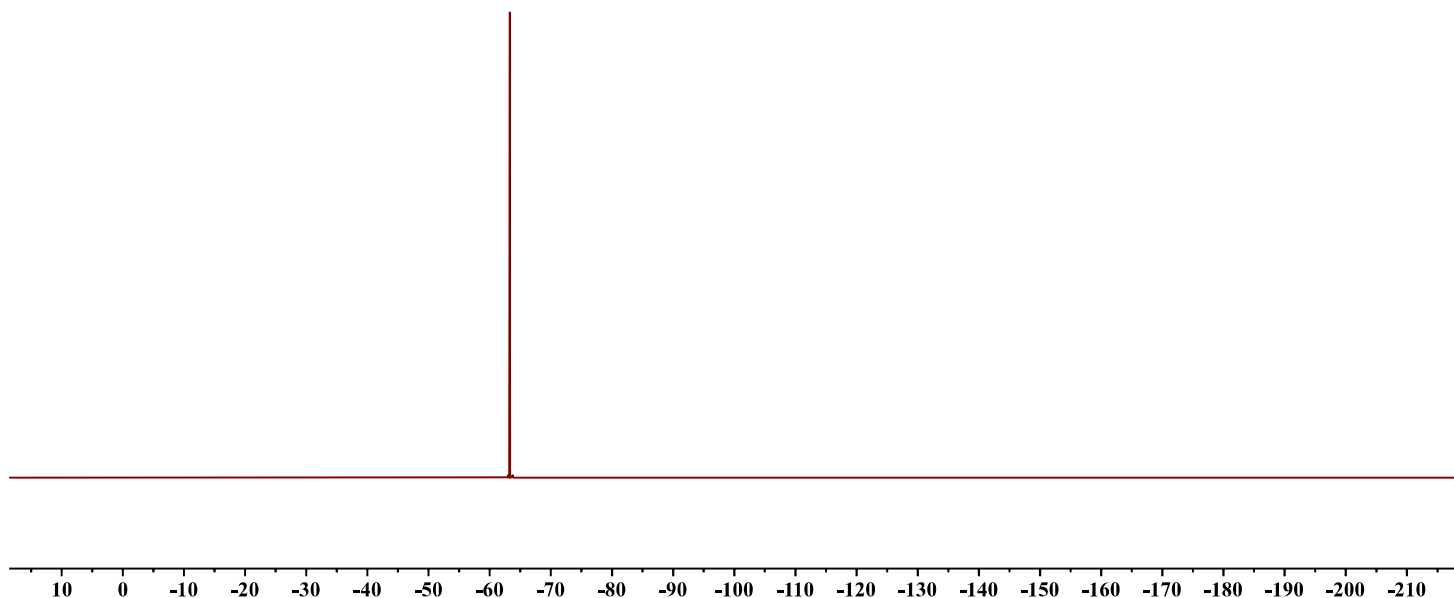

9.45  
9.44  
8.84  
8.84  
8.16  
8.13  
7.93  
7.91  
7.84  
7.84  
7.83  
7.82  
7.81  
7.80  
7.63  
7.63  
7.61  
7.61  
7.60  
7.59  
7.59  
7.26  
7.26  
4.67  
4.65  
4.64  
3.88  
3.86  
3.85

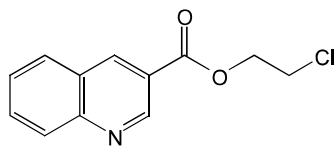

<sup>1</sup>H NMR (400 MHz, CDCl<sub>3</sub>)

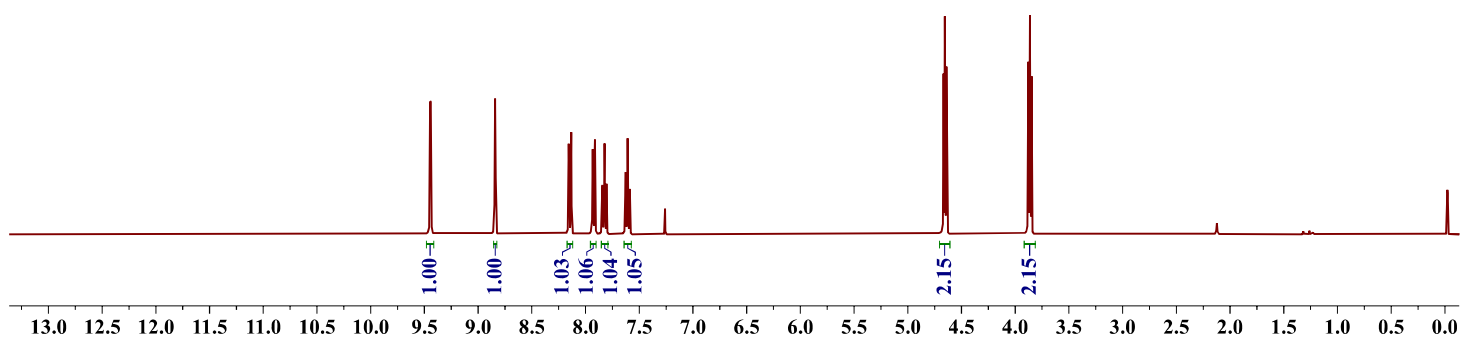



161.34  
161.01  
155.63

121.33

77.32  
77.00  
76.68

41.26

17.20

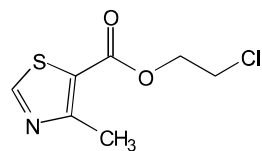

**3h**

<sup>13</sup>C NMR (101 MHz, CDCl<sub>3</sub>)

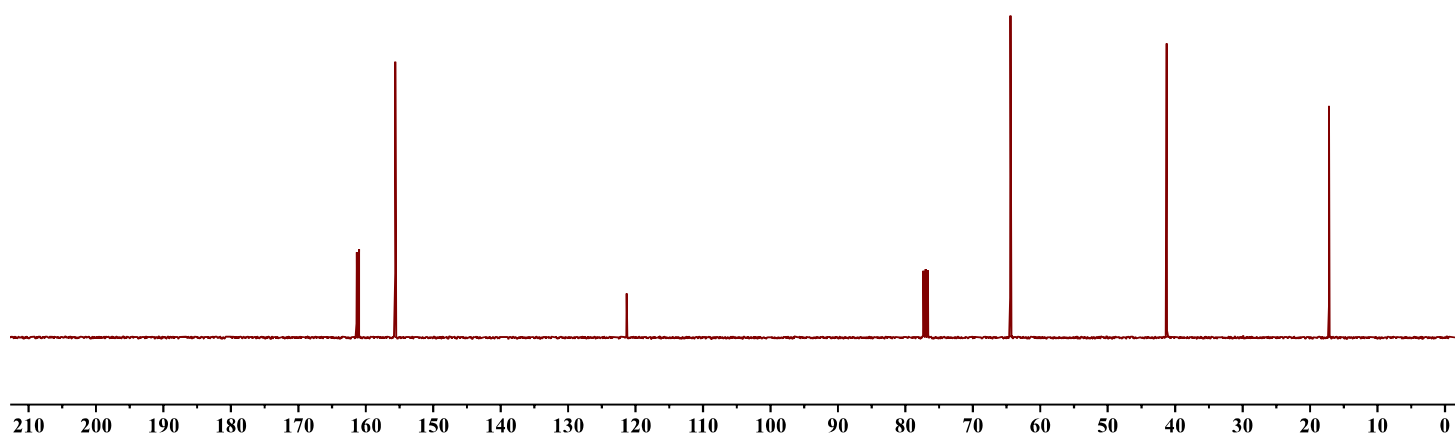

7.79  
7.41  
7.26  
6.71

4.73  
4.72  
4.71  
3.98  
3.97  
3.96

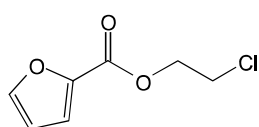

**3i**

<sup>1</sup>H NMR (600 MHz, CDCl<sub>3</sub>)

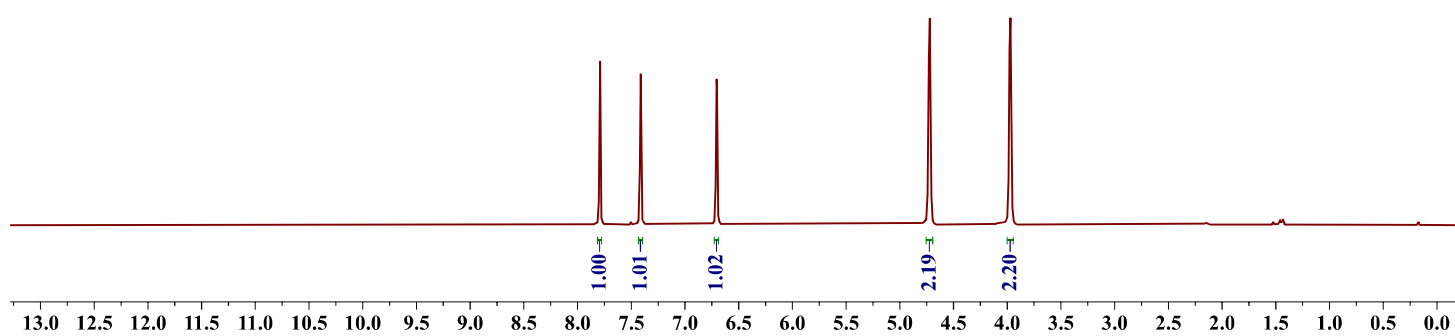

-157.91  
-146.55  
-143.84  
-118.43  
-111.76  
77.21  
77.00  
76.79  
-64.06  
-41.28

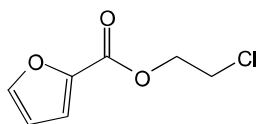

**3i**

<sup>13</sup>C NMR (151 MHz, CDCl<sub>3</sub>)

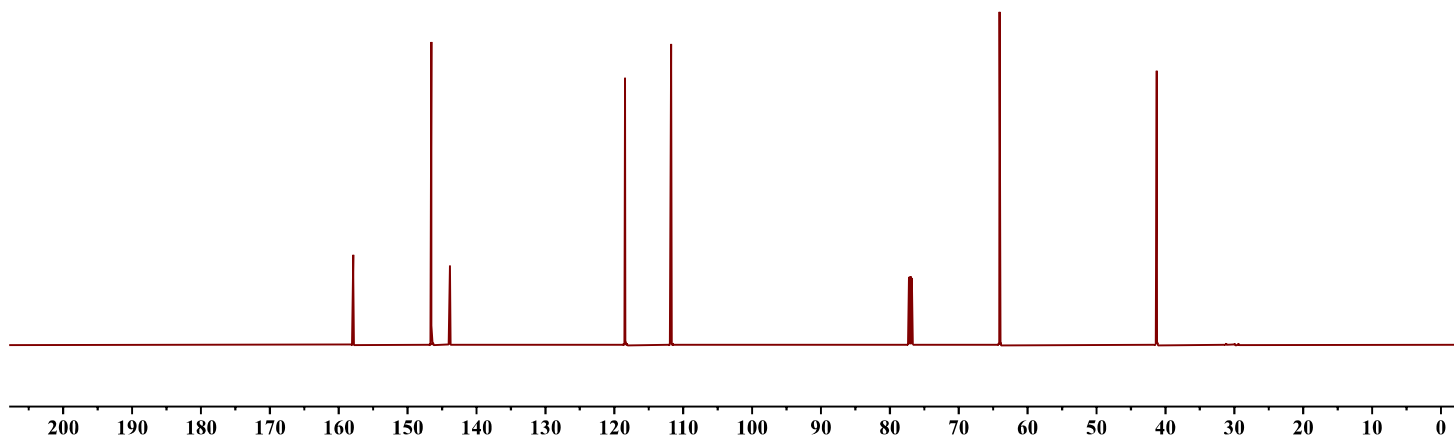

7.26  
4.25  
4.24  
4.22  
3.62  
3.60  
3.59  
2.31  
2.30  
2.29  
2.28  
2.27  
2.26  
2.25  
2.24  
2.24  
1.86  
1.85  
1.83  
1.82  
1.69  
1.68  
1.67  
1.66  
1.42  
1.39  
1.36  
1.34  
1.33  
1.27  
1.26  
1.24  
1.23  
1.22  
1.20  
1.18  
1.16  
1.14  
1.13  
1.12

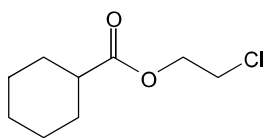

**3j**

<sup>1</sup>H NMR (400 MHz, CDCl<sub>3</sub>)

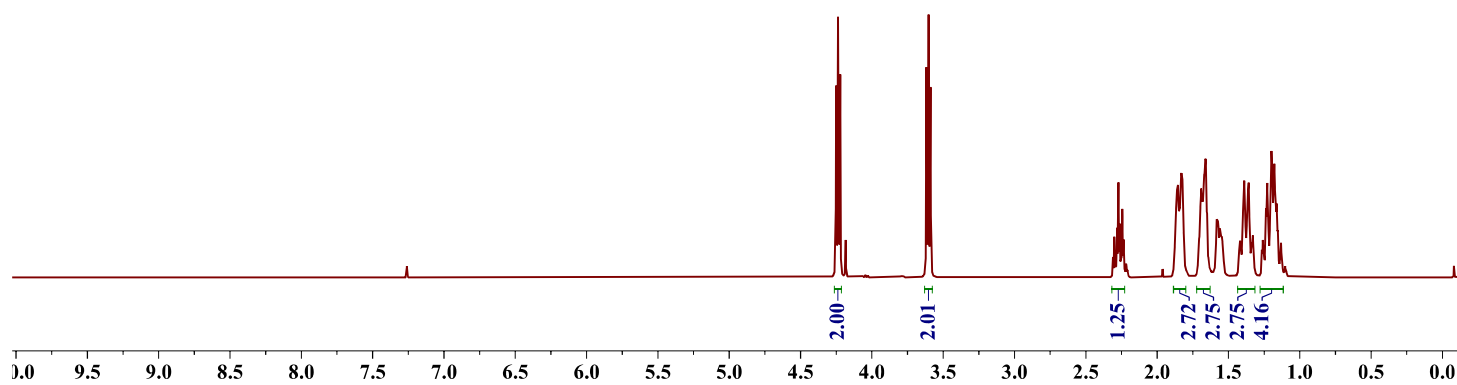

—181.89  
—175.44

77.32  
77.00  
76.68

—63.47

42.74  
41.55

28.70  
28.54

25.48  
25.13

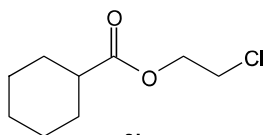

**3j**

<sup>13</sup>C NMR (101 MHz, CDCl<sub>3</sub>)

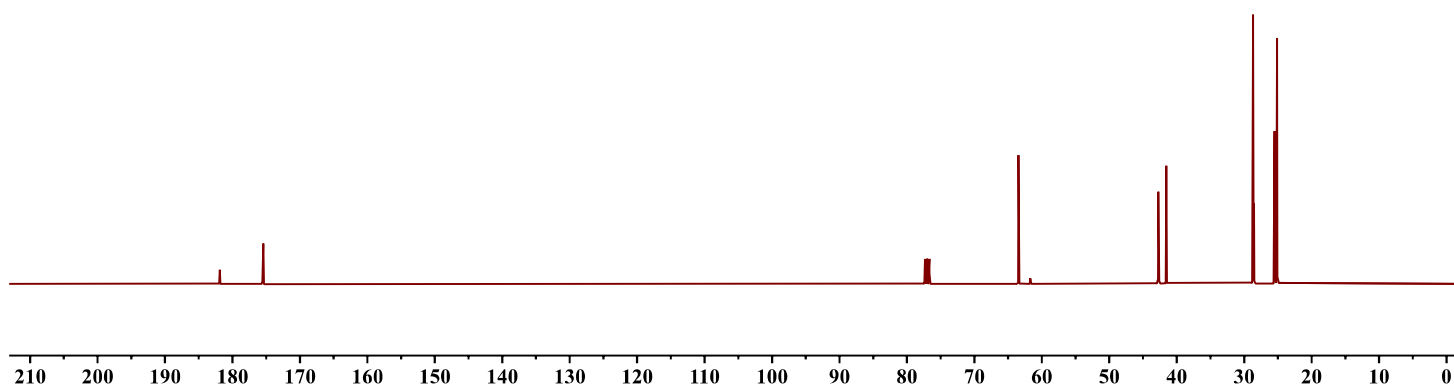

—7.26

4.31  
4.30  
4.28

3.68  
3.67  
3.66

2.04  
2.02  
2.01

1.91  
1.90  
1.75

1.72  
1.71  
1.68

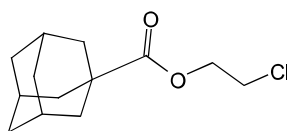

**3k**

<sup>1</sup>H NMR (400 MHz, CDCl<sub>3</sub>)

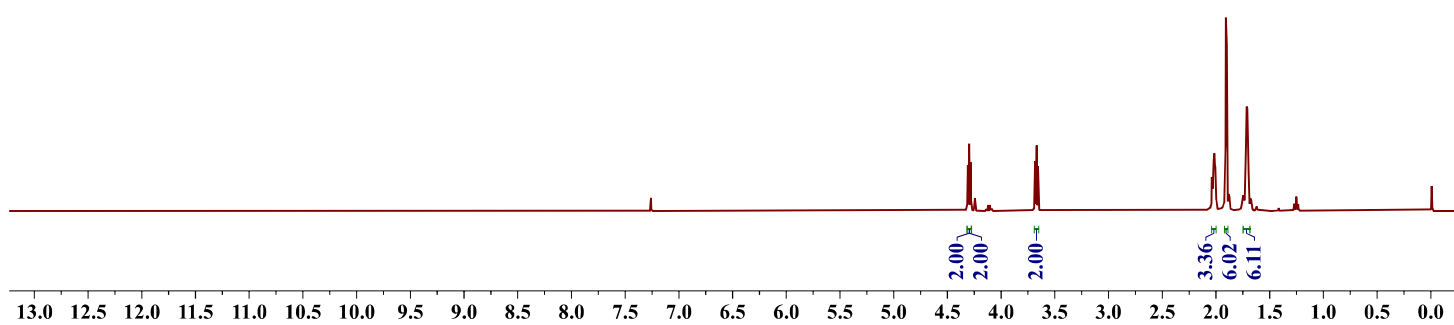

-176.83

77.32  
77.00  
76.68

-63.34

41.56  
40.48  
38.48  
36.20  
-27.66

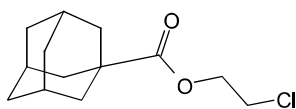

**3k**

<sup>13</sup>C NMR (101 MHz, CDCl<sub>3</sub>)

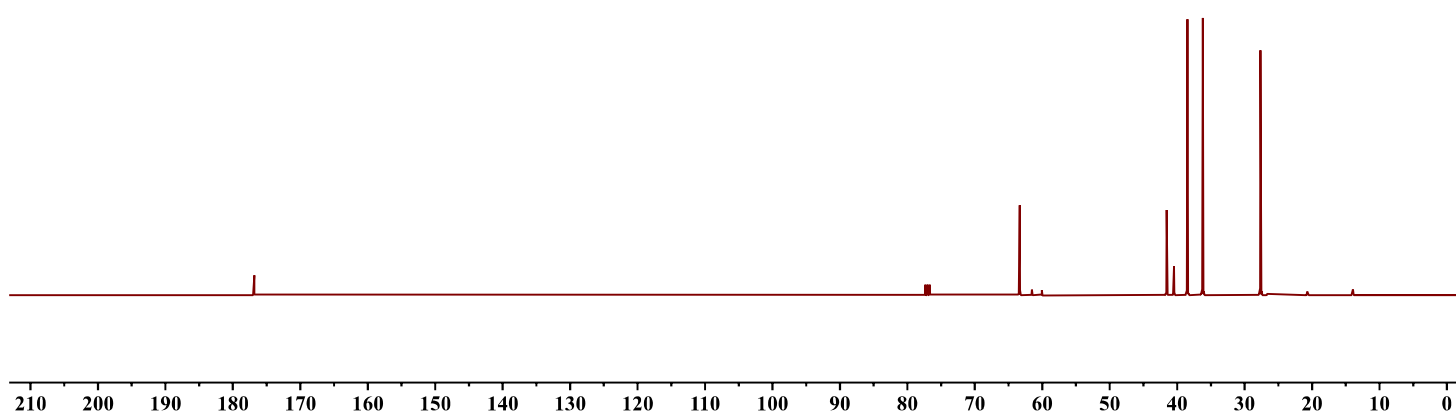

7.59  
7.57  
7.30  
7.30  
7.29  
7.29  
7.26  
7.18  
7.17  
7.17  
7.16  
7.15  
7.14  
7.14

4.40  
4.38  
4.37  
3.84  
3.70  
3.69  
3.67

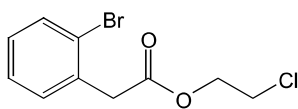

**3l**

<sup>1</sup>H NMR (400 MHz, CDCl<sub>3</sub>)

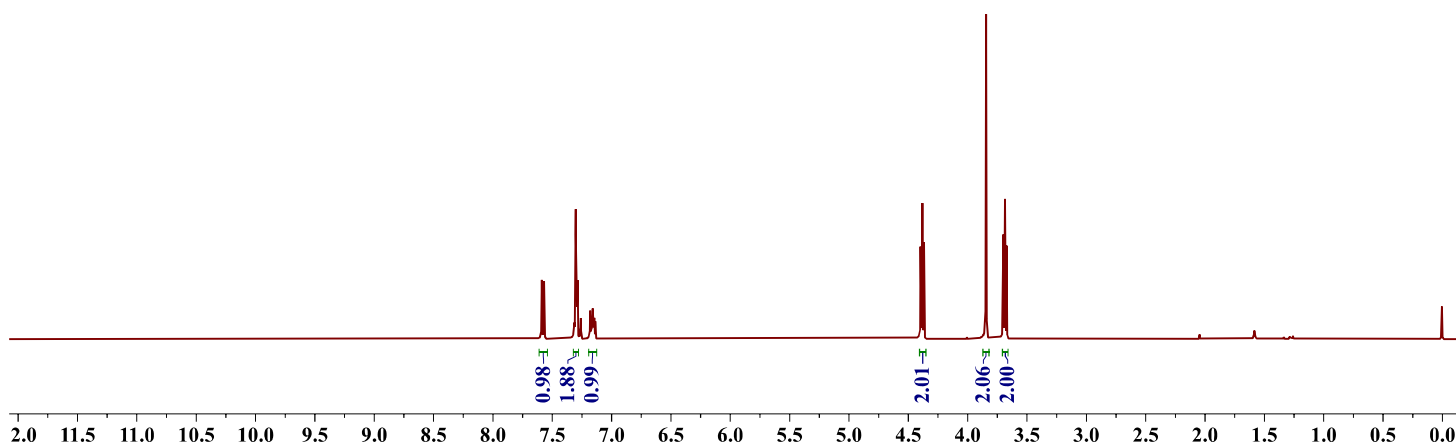

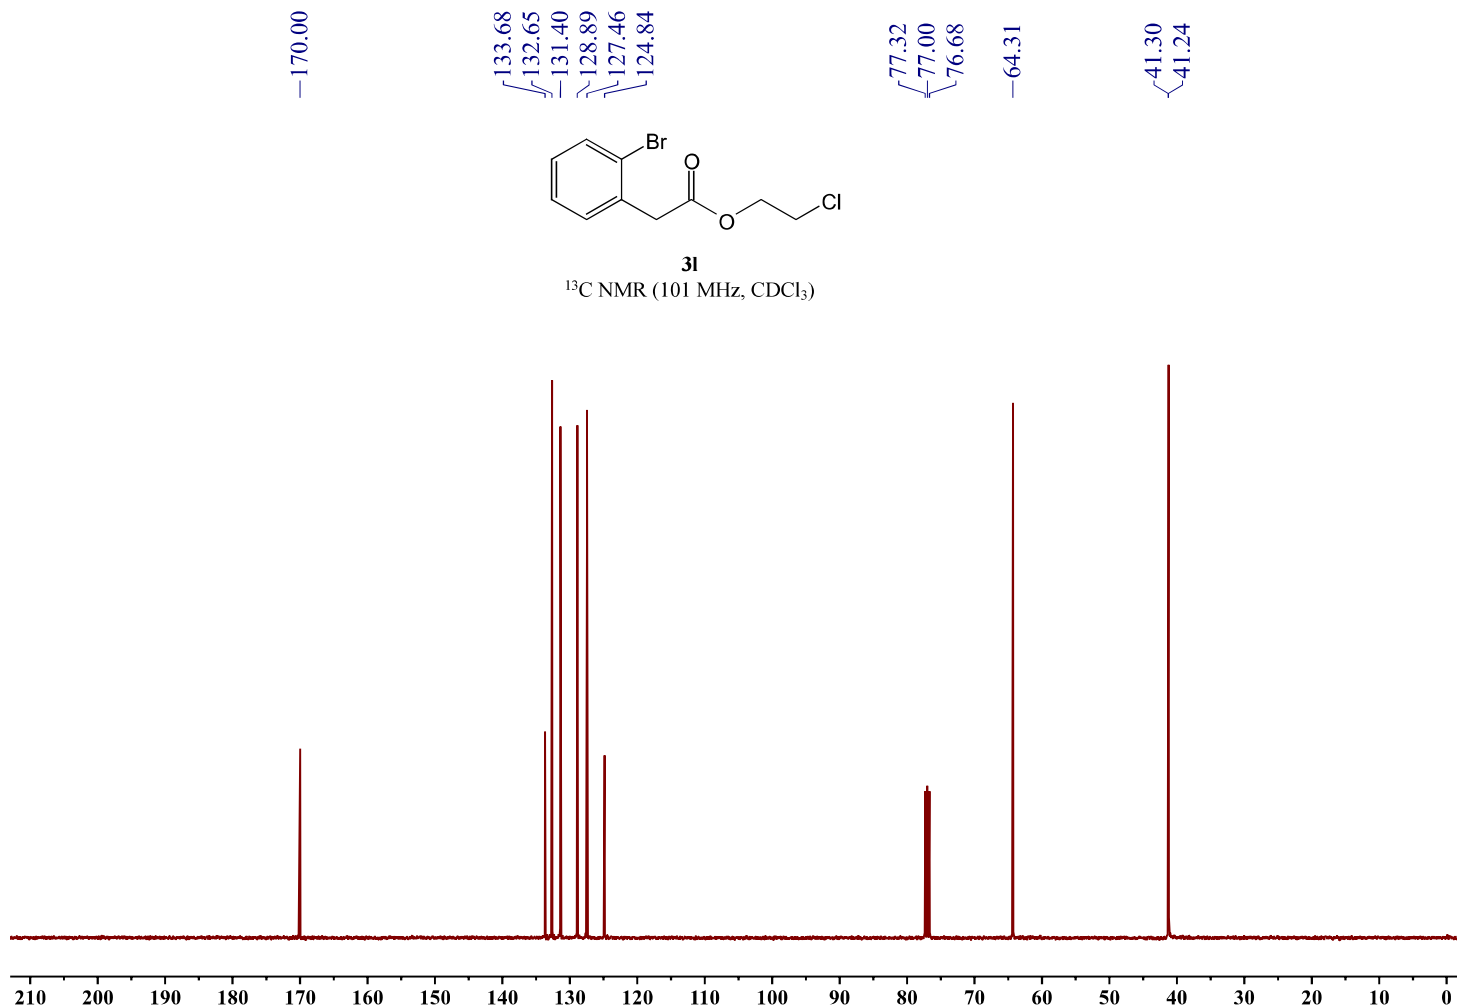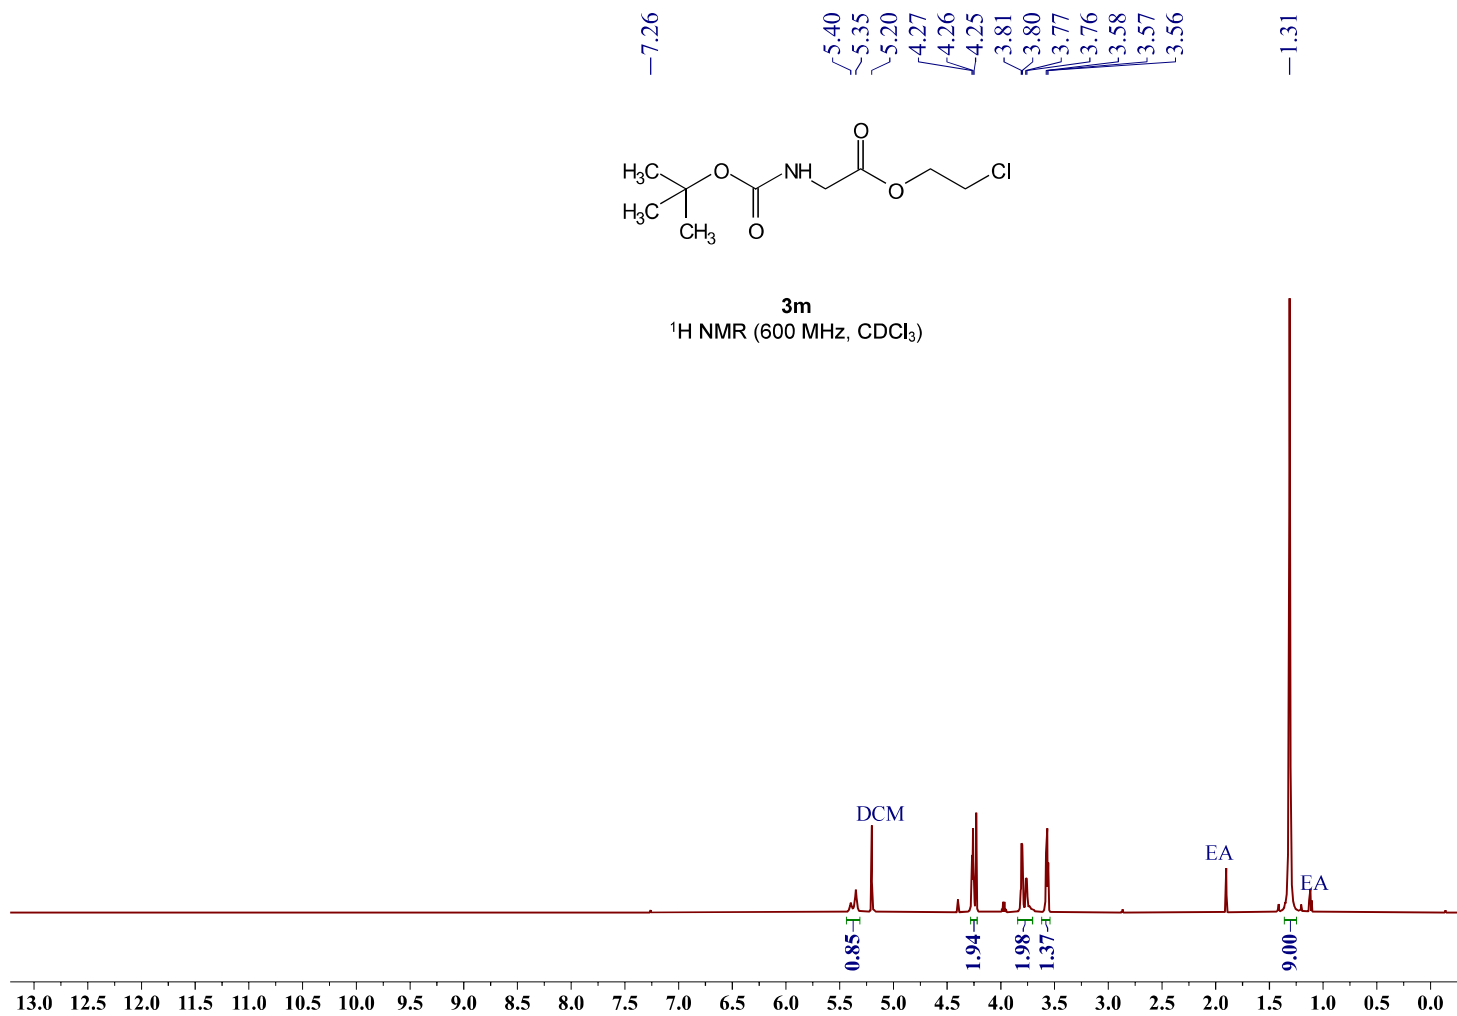



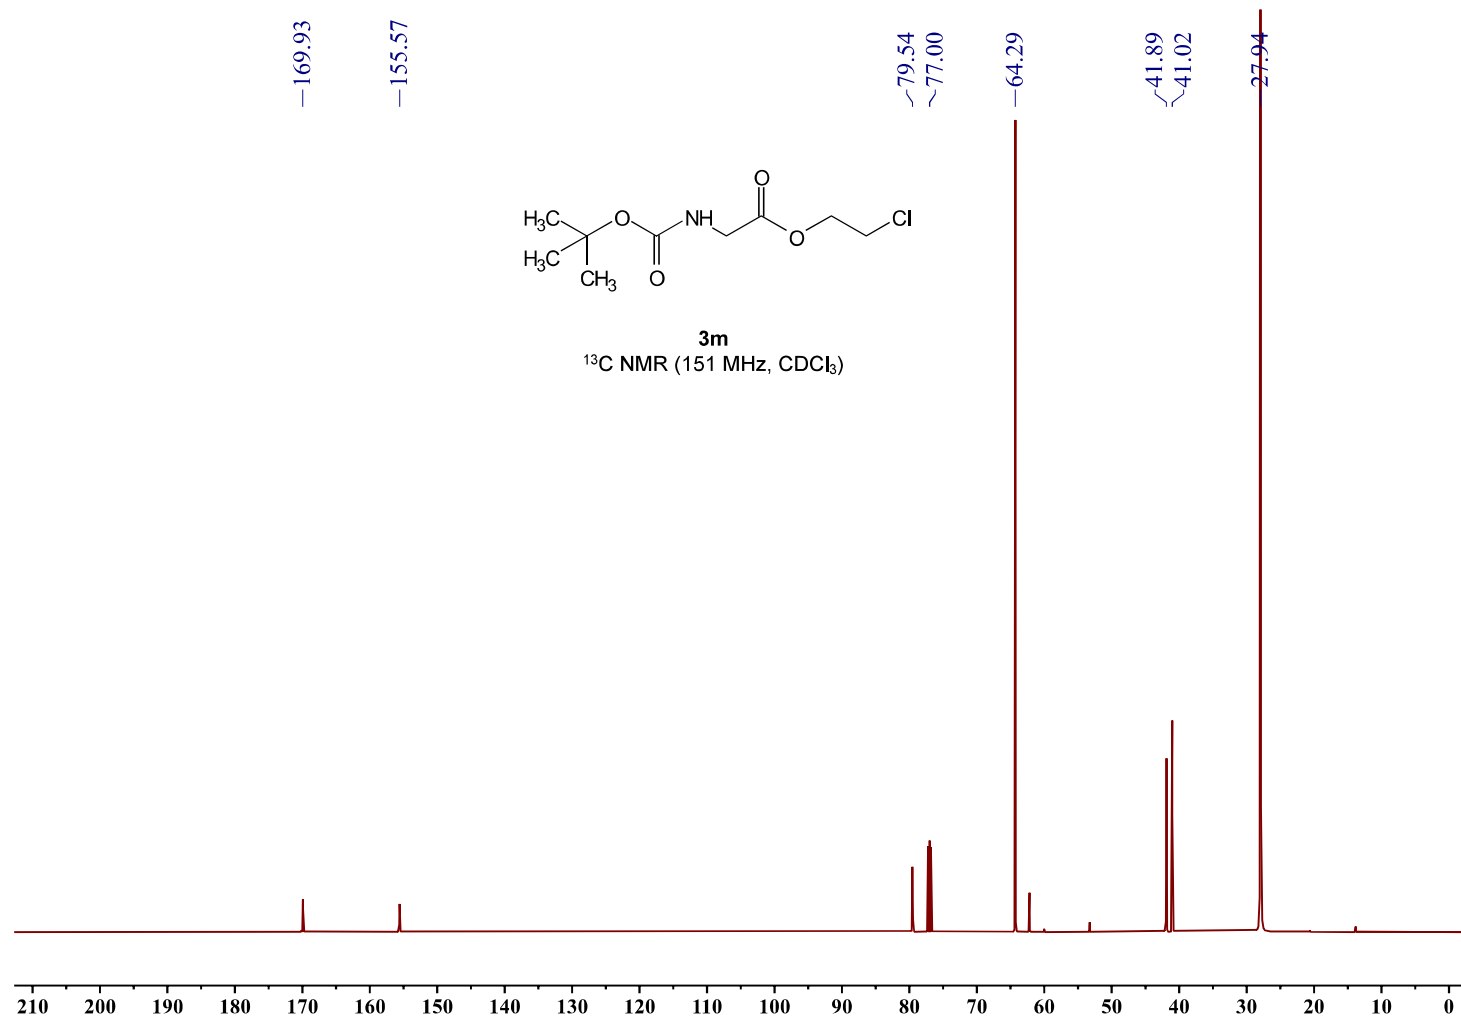

$^1\text{H}$  NMR (400 MHz,  $\text{CDCl}_3$ ) spectrum of **3n** showing chemical shifts (ppm):

- 7.35
- 7.35
- 7.34
- 7.33
- 7.32
- 7.31
- 7.30
- 7.29
- 7.28
- 7.26
- 5.67
- 5.65
- 5.34
- 5.32
- 4.34
- 4.33
- 4.31
- 4.30
- 4.28
- 4.27
- 4.25
- 4.24
- 3.55
- 3.55
- 3.54
- 3.53
- 3.52
- 3.52
- 1.97
- 1.40

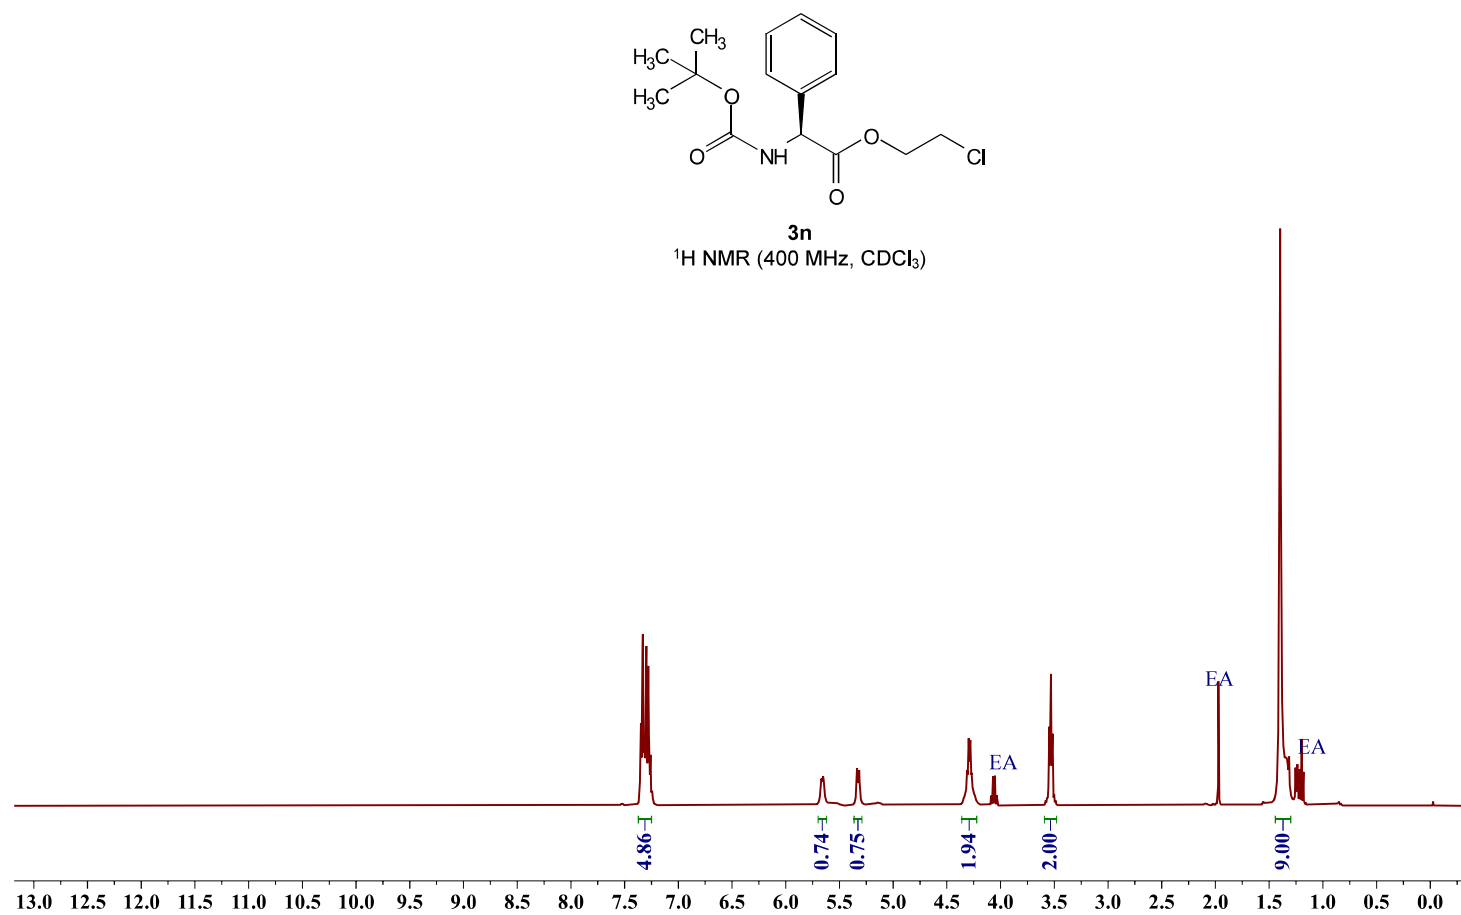

-170.31  
 -154.30  
 135.85  
 128.37  
 128.01  
 126.66  
 -79.61  
 -77.00  
 -64.37  
 -57.13  
 -40.48  
 -27.75

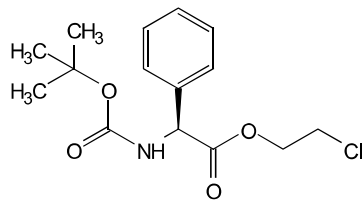

**3n**  
<sup>13</sup>C NMR (101 MHz, CDCl<sub>3</sub>)

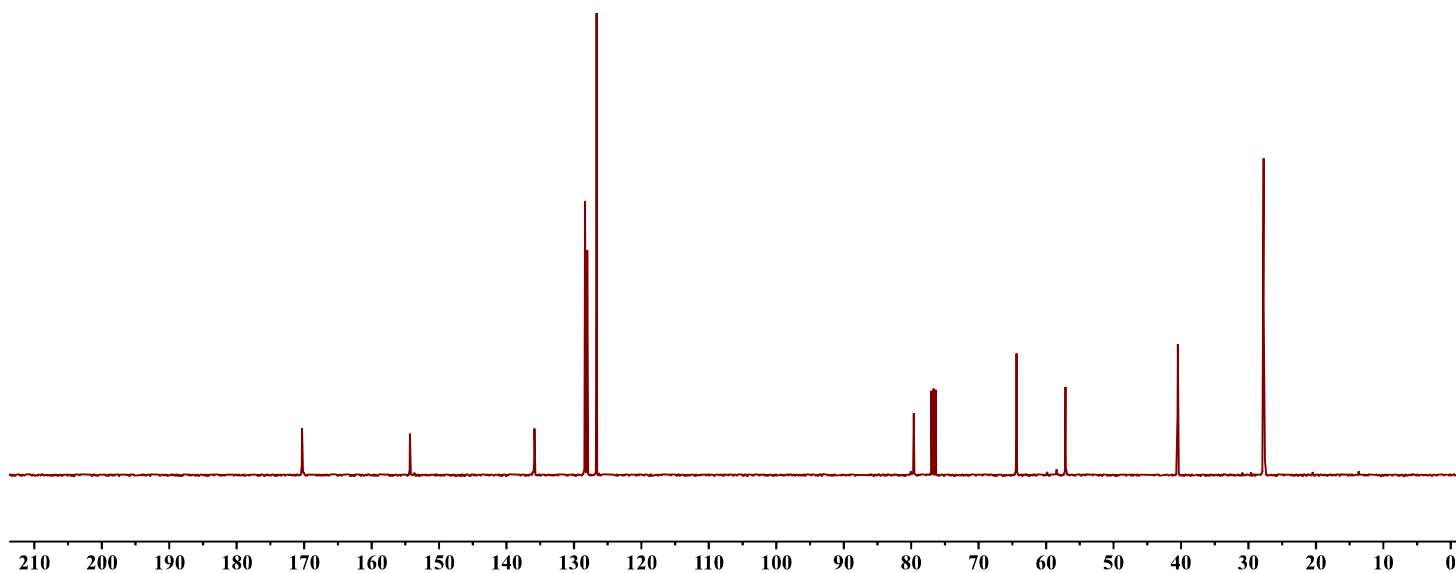

7.15  
 7.13  
 7.13  
 7.11  
 7.11  
 7.05  
 7.03  
 6.95  
 6.95  
 6.93  
 6.93  
 6.90  
 6.90  
 6.88  
 6.88  
 6.86  
 6.86  
 4.81  
 4.80  
 4.79  
 4.78  
 4.48  
 4.46  
 4.45  
 4.44  
 4.43  
 4.43  
 4.42  
 4.40  
 3.71  
 3.70  
 3.69  
 2.85  
 2.84  
 2.82  
 2.81  
 2.80  
 2.78  
 2.32  
 2.31  
 2.31  
 2.30  
 2.30  
 2.29  
 2.25  
 2.25  
 2.23  
 2.23  
 2.21

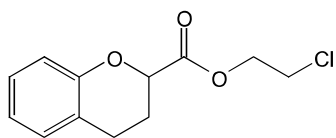

**3o**  
<sup>1</sup>H NMR (400 MHz, CDCl<sub>3</sub>)

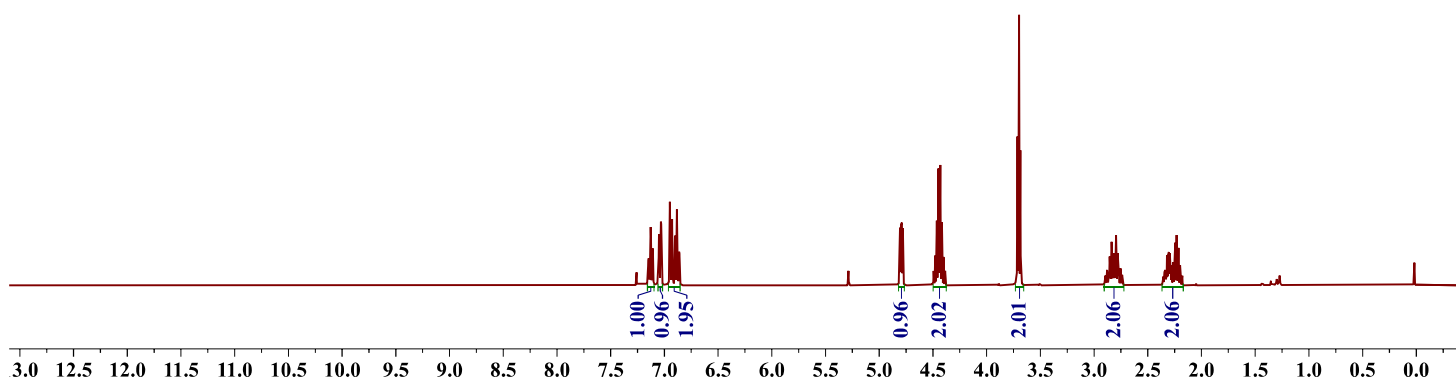

-170.31  
 -153.09  
 129.25  
 127.36  
 120.95  
 120.67  
 116.63  
 77.32  
 77.00  
 76.68  
 73.22  
 64.35  
 -41.25  
 24.33  
 22.89

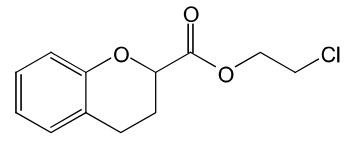

**3o**  
<sup>13</sup>C NMR (101 MHz, CDCl<sub>3</sub>)

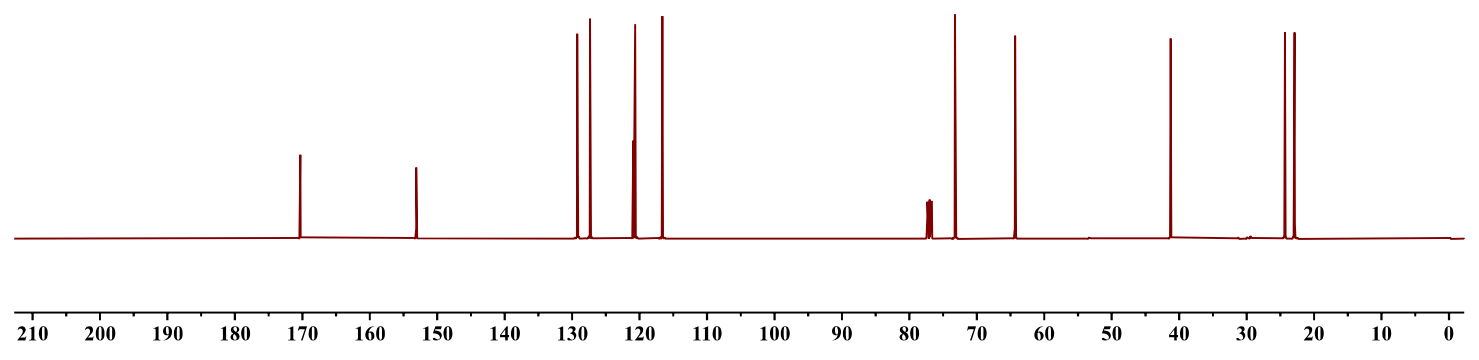

7.58  
 7.57  
 7.56  
 7.46  
 7.45  
 7.45  
 7.45  
 7.44  
 7.44  
 7.43  
 7.43  
 7.43  
 7.37  
 7.37  
 7.36  
 7.36  
 7.36  
 7.35  
 7.26  
 4.47  
 4.46  
 4.45  
 3.75  
 3.74  
 3.73

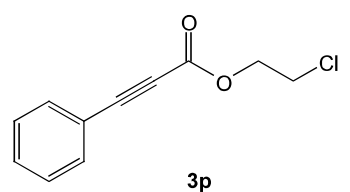

**3p**  
<sup>1</sup>H NMR (600 MHz, CDCl<sub>3</sub>)

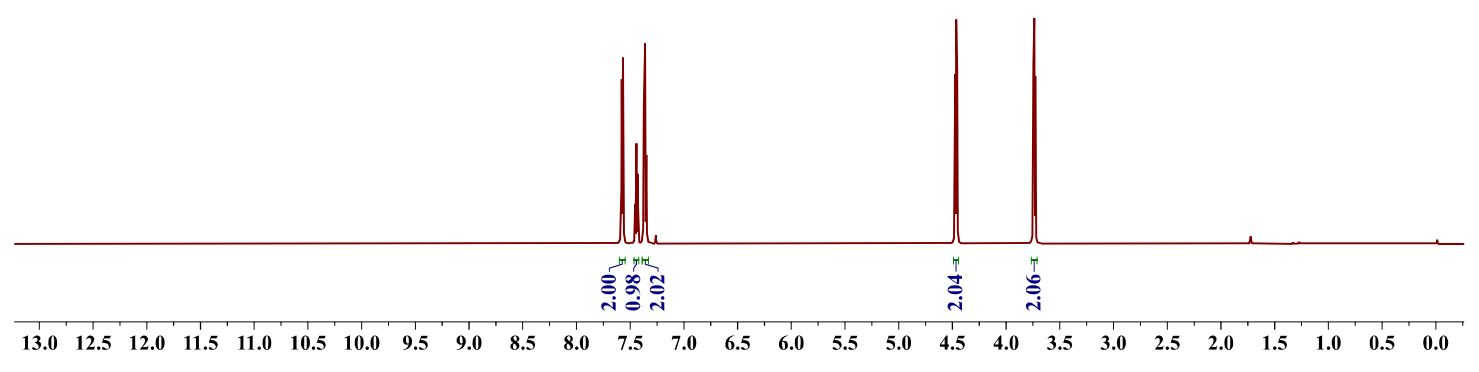

—153.35  
 /132.92  
 —130.76  
 \128.49  
 —119.12  
 /87.22  
 /79.93  
 \77.00  
 —65.13  
 —40.92

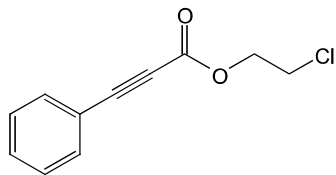

**3p**

<sup>13</sup>C NMR (151 MHz, CDCl<sub>3</sub>)

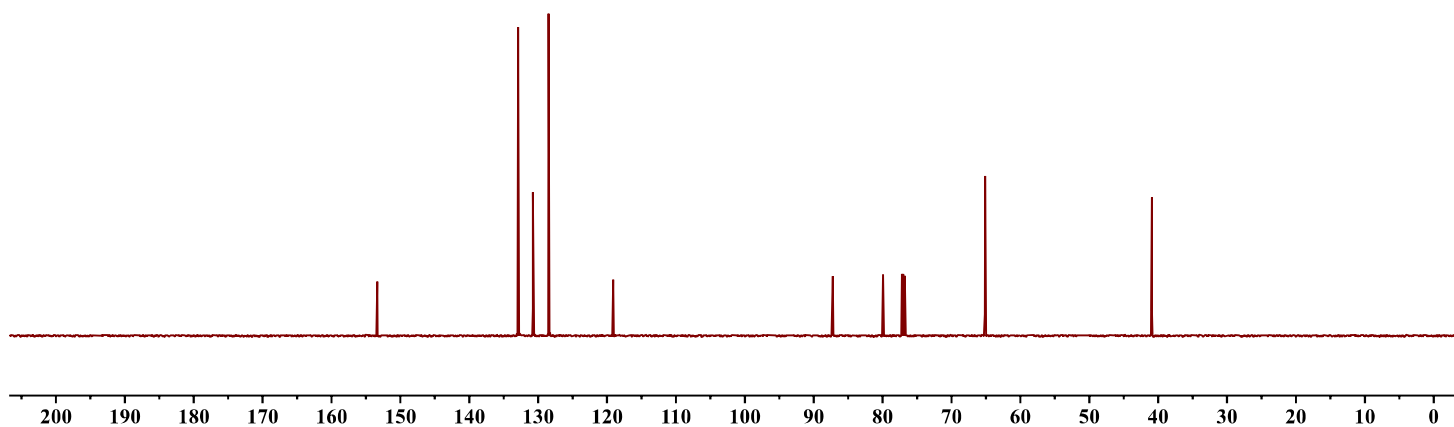

7.34  
 7.33  
 7.33  
 7.31  
 7.31  
 7.29  
 7.29  
 7.26  
 7.17  
 7.15  
 7.12  
 7.11  
 7.10  
 7.09  
 7.08  
 7.08  
 5.30  
 5.07  
 4.32  
 4.30  
 4.30  
 4.30  
 4.29  
 3.59  
 3.58  
 3.57  
 3.56

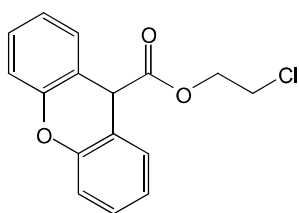

**3q**

<sup>1</sup>H NMR (400 MHz, CDCl<sub>3</sub>)

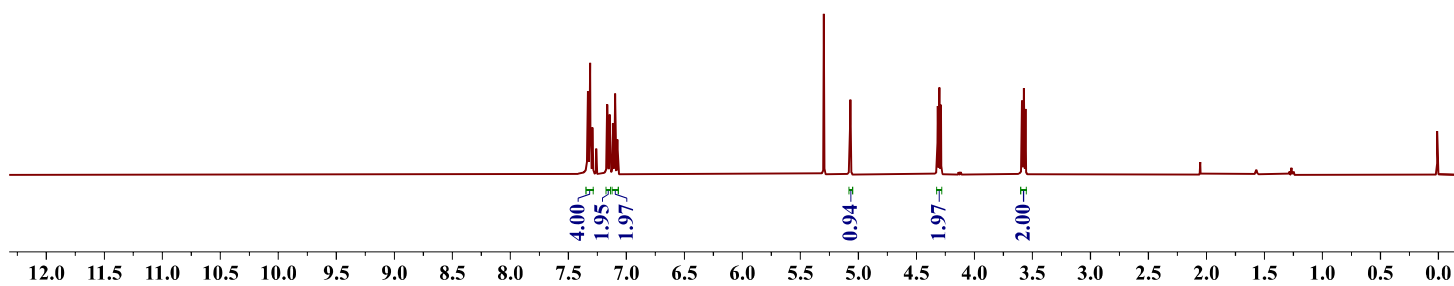

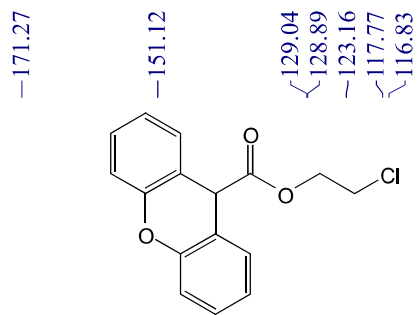

**3q**  
 $^{13}\text{C}$  NMR (101 MHz,  $\text{CDCl}_3$ )

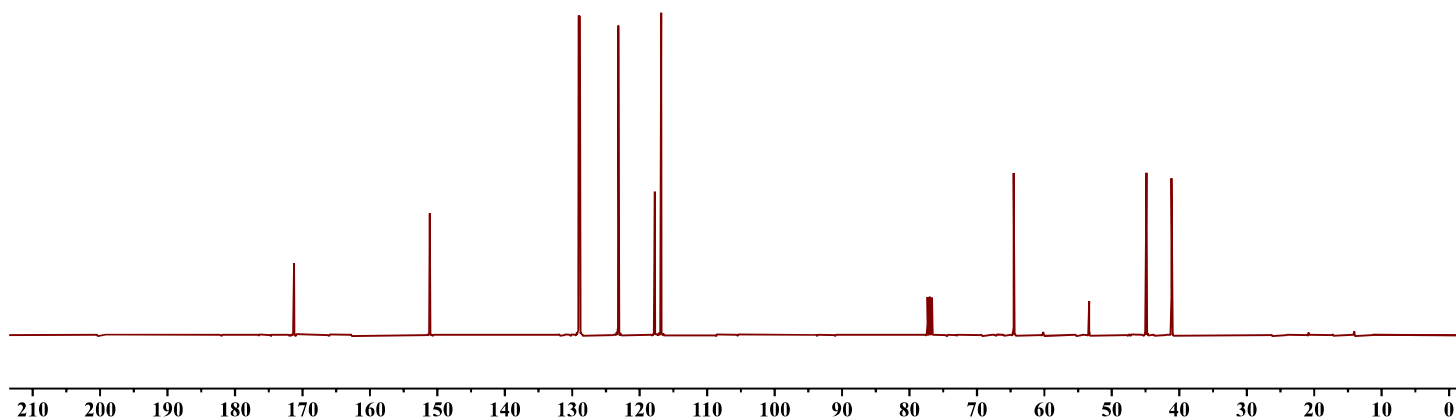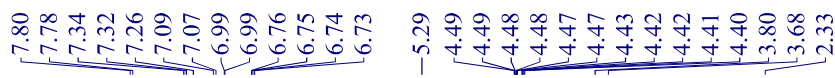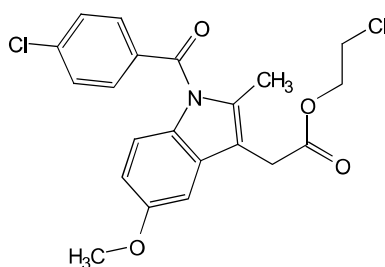

**3r**  
 $^1\text{H}$  NMR (400 MHz,  $\text{CDCl}_3$ )

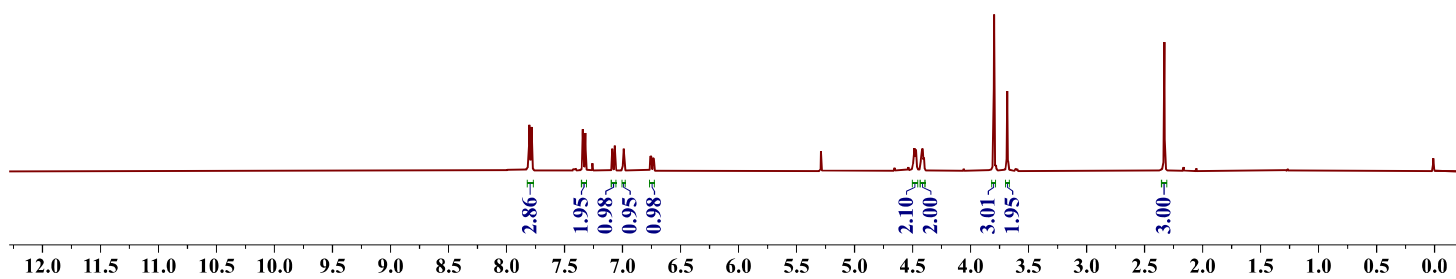

169.20  
168.27

156.08  
146.33  
139.40  
137.02  
133.70  
131.23  
130.78  
130.61  
130.42  
129.14  
126.39  
120.25  
114.97  
114.49  
111.95  
110.93  
101.28

77.32  
77.00  
76.68

55.70

31.50

13.64

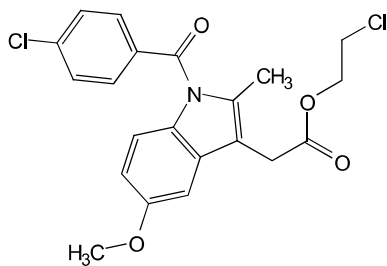

3r

<sup>13</sup>C NMR (101 MHz, CDCl<sub>3</sub>)

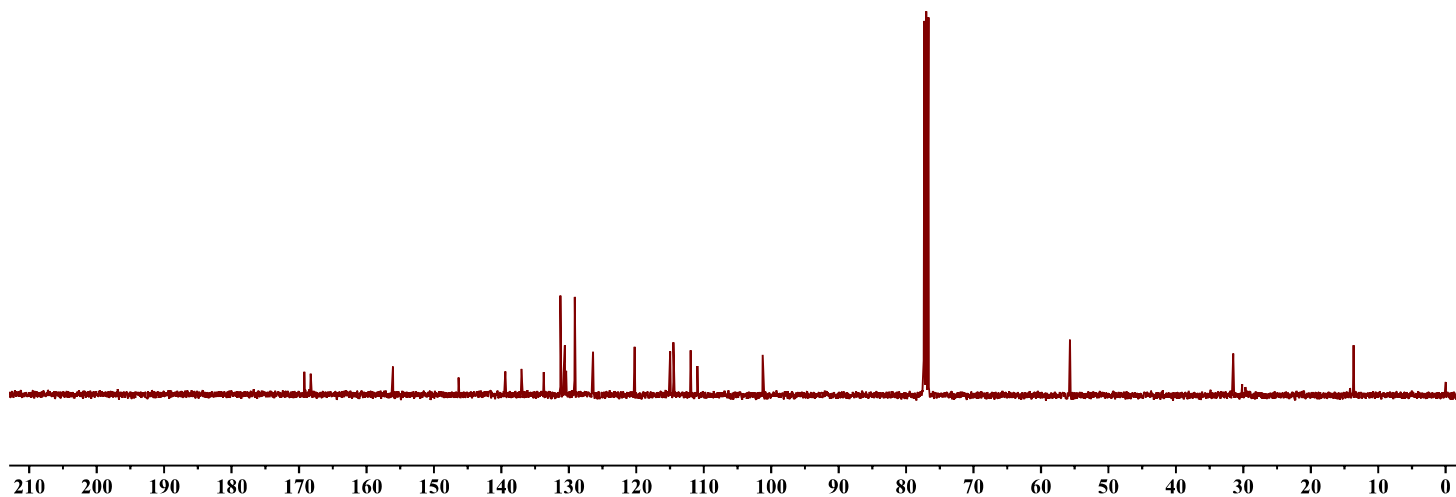

7.80  
7.78  
7.77  
7.76  
7.75  
7.73  
7.71  
7.70  
7.69  
7.68  
7.64  
7.62  
7.26  
7.22  
7.19  
7.16  
7.13  
7.10  
7.09

3.63  
3.57  
2.91  
2.89  
2.83  
2.28  
2.25  
2.20

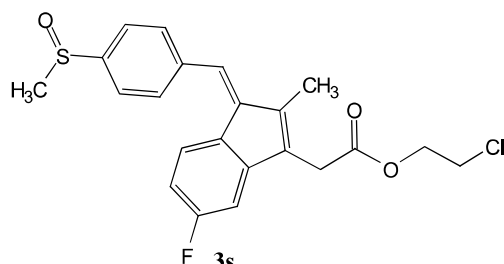

3s

<sup>1</sup>H NMR (600 MHz, CDCl<sub>3</sub>)

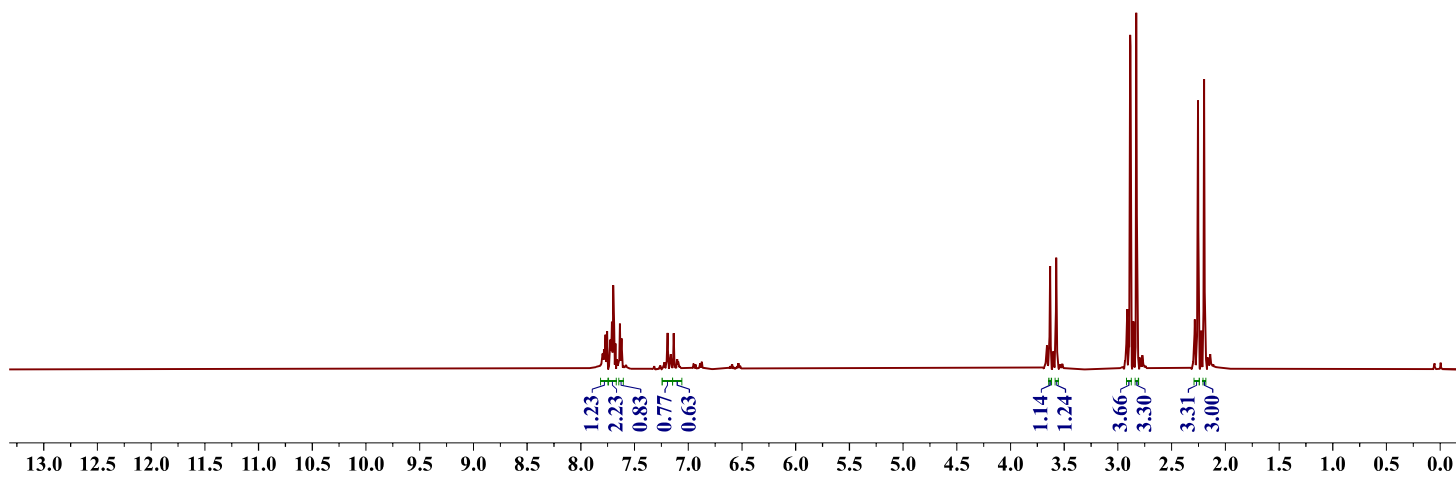

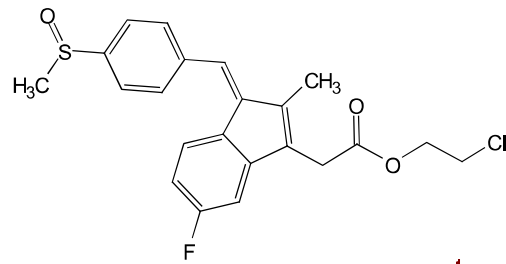

**3s**

<sup>13</sup>C NMR (151 MHz, CDCl<sub>3</sub>)

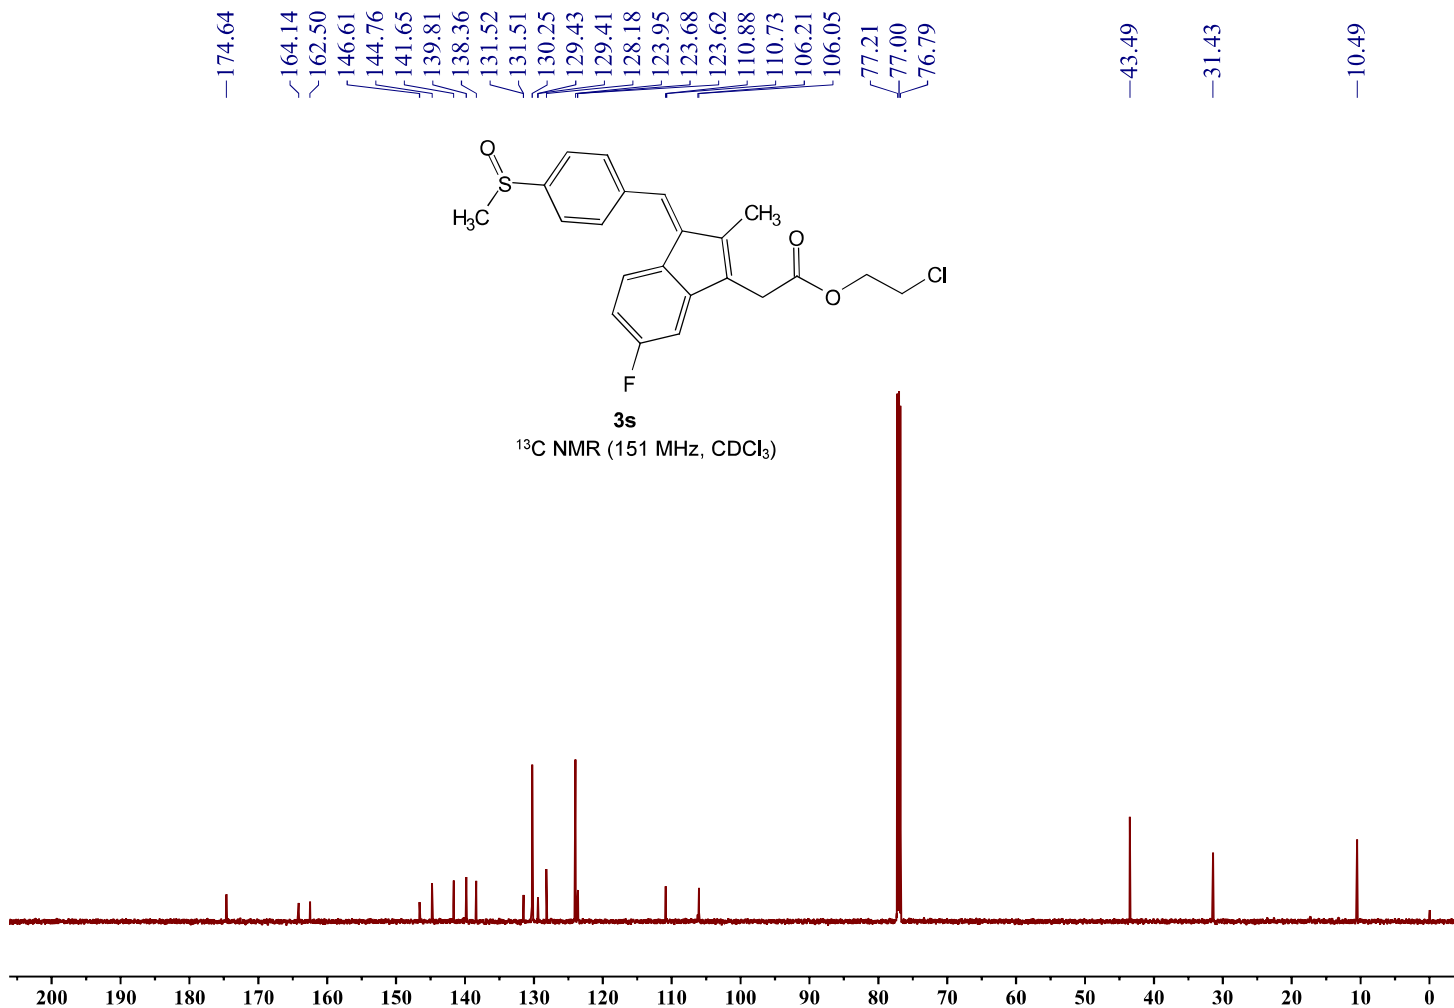

Chemical shift values (ppm): 8.08, 8.07, 8.06, 8.06, 8.05, 8.05, 7.60, 7.58, 7.57, 7.57, 7.57, 7.55, 7.48, 7.47, 7.46, 7.45, 7.44, 7.43, 7.26, 5.39, 5.38, 5.36, 5.35, 5.34, 5.32, 4.44, 4.42, 4.36, 4.35, 4.33, 4.31, 4.30, 4.29, 4.28, 3.75, 3.74, 3.72, 3.71, 1.62, 1.60, 1.48, 1.46.

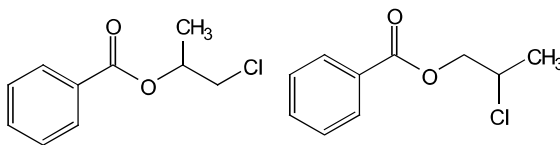

**4a**

<sup>1</sup>H NMR (400 MHz, CDCl<sub>3</sub>)

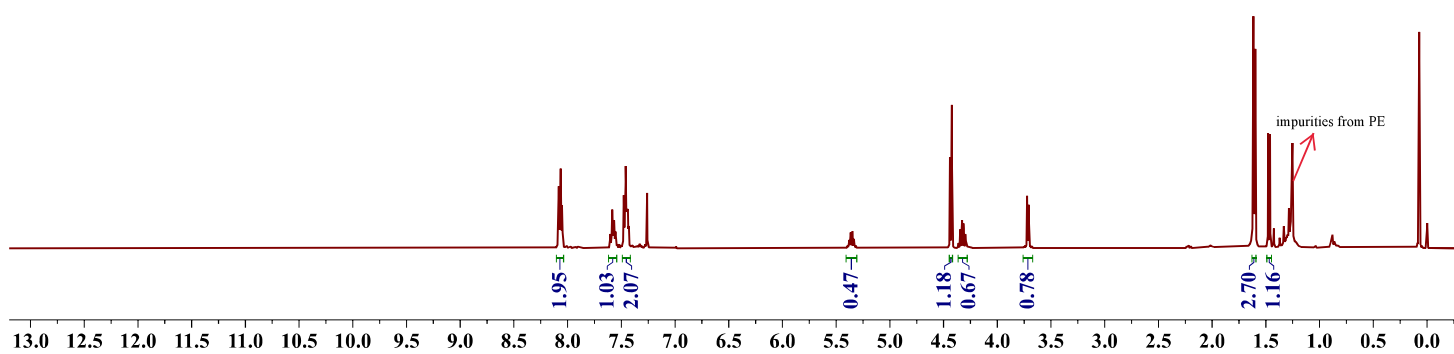

166.06  
165.78

133.25  
133.12  
129.71  
129.68  
128.44  
128.37

77.32  
77.00  
76.68  
70.17  
68.93

-54.02  
-46.99

29.68  
21.61  
17.68

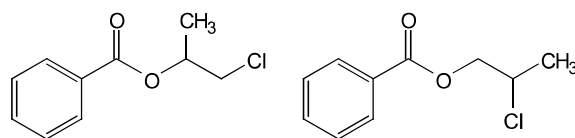

**4a**

<sup>13</sup>C NMR (101 MHz, CDCl<sub>3</sub>)

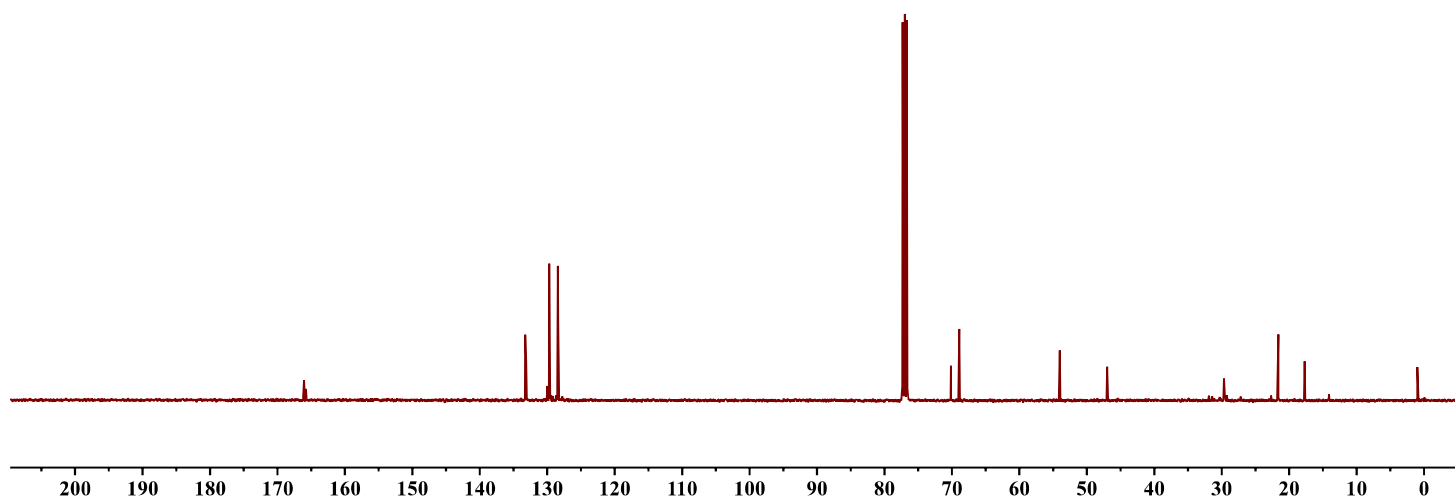

7.88  
7.87  
7.86  
7.85  
7.39  
7.38  
7.36  
7.35  
7.34  
7.33  
7.32  
7.31  
7.26  
5.38  
5.37  
5.36  
5.35  
5.34  
5.34  
5.33  
5.32  
5.31  
4.43  
4.41  
4.36  
4.34  
4.33  
4.31  
4.30  
4.28  
3.72  
3.71  
2.41

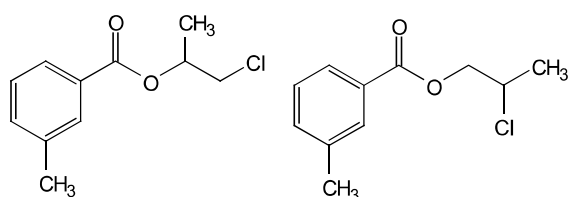

**4b**

<sup>1</sup>H NMR (400 MHz, CDCl<sub>3</sub>)

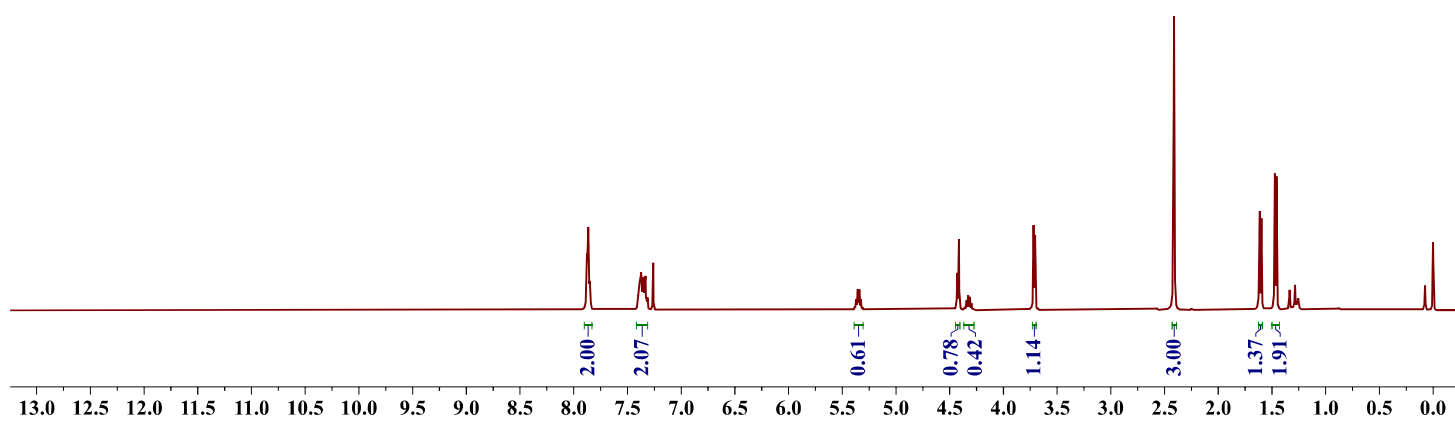



166.22  
165.94  
138.24  
138.17  
134.01  
133.88  
130.20  
130.16  
129.89  
129.53  
128.32  
128.26  
126.84  
126.81

77.32  
77.20  
77.00  
76.68  
70.06  
68.86

-54.05  
-46.99

21.62  
21.26  
17.68

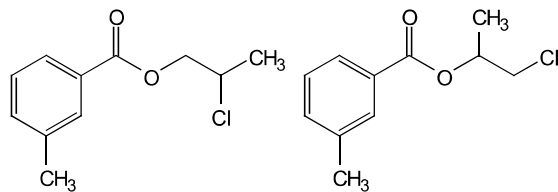

<sup>13</sup>C NMR (101 MHz, CDCl<sub>3</sub>)

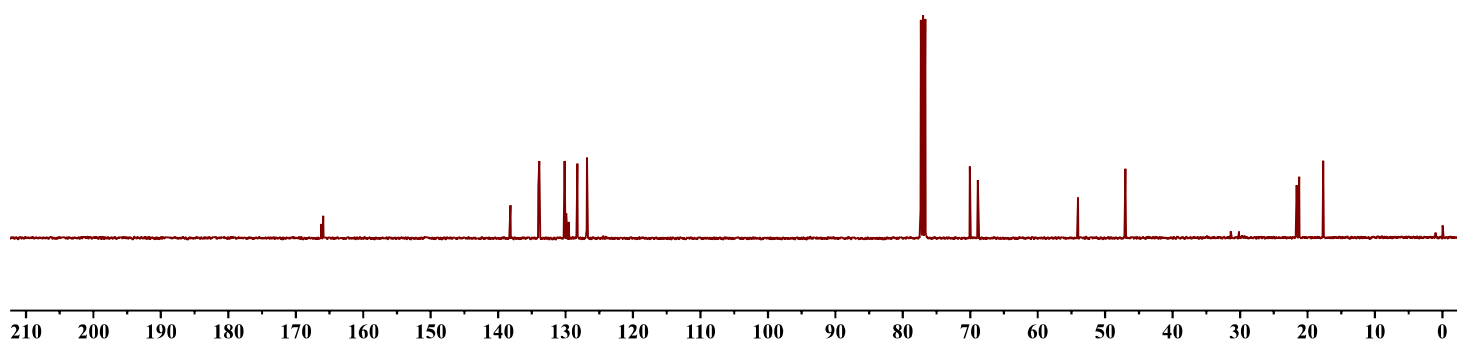

8.20  
8.19  
8.19  
8.18  
8.18  
8.17  
8.01  
8.01  
8.01  
8.00  
8.00  
7.99  
7.99  
7.99  
7.98  
7.98  
7.97  
7.72  
7.72  
7.72  
7.71  
7.71  
7.70  
7.70  
7.69  
7.69  
7.69  
7.68  
7.36  
7.35  
7.34  
7.33  
7.32  
7.31  
7.26  
5.37  
5.36  
5.34  
4.44  
4.42  
4.32  
4.31  
3.72  
3.71  
3.71  
3.70  
1.61  
1.59  
1.48  
1.46

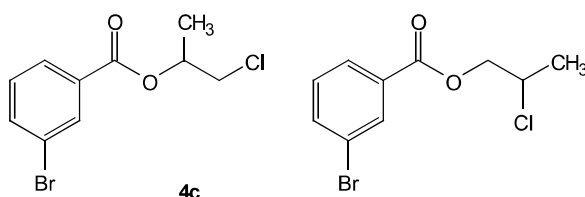

<sup>1</sup>H NMR (400 MHz, CDCl<sub>3</sub>)

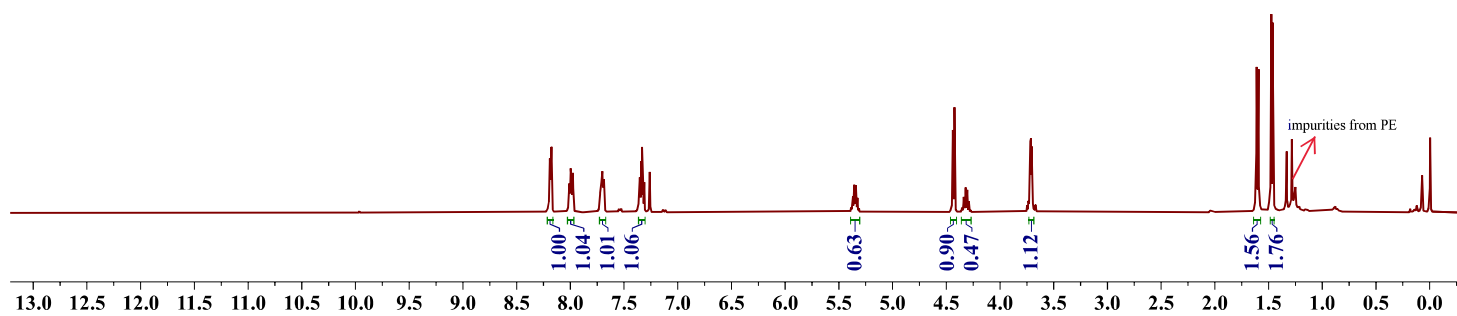

164.72  
164.44

136.21  
136.07  
132.67  
132.63  
131.92  
131.56  
130.03  
129.97  
128.31  
128.29  
122.52  
122.46

77.32  
77.00  
76.68  
70.71  
69.26

53.84  
46.81

21.58  
17.68

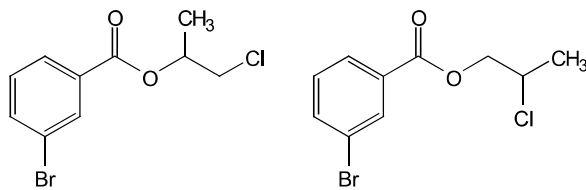

4c

$^{13}\text{C}$  NMR (101 MHz,  $\text{CDCl}_3$ )

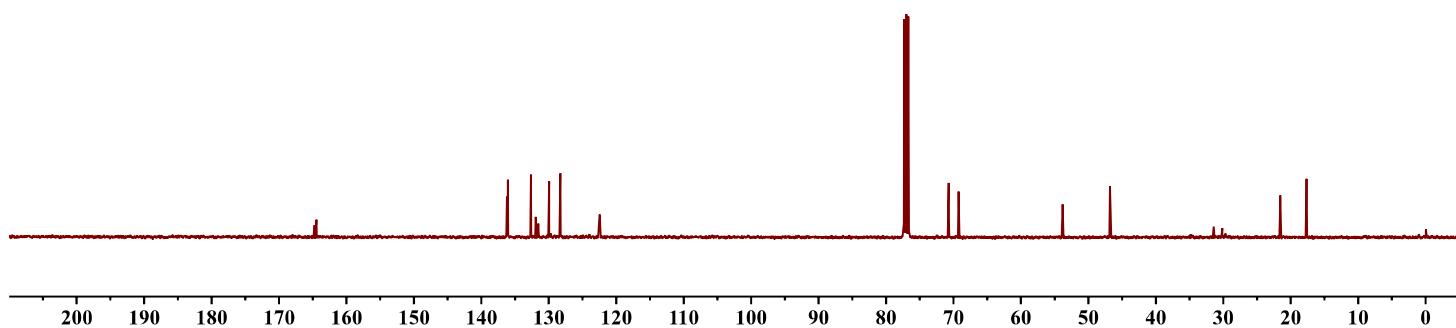

8.64  
8.63  
8.10  
8.09  
8.09  
8.08  
8.07  
8.06  
7.98  
7.96  
7.91  
7.89  
7.88  
7.62  
7.62  
7.60  
7.59  
7.58  
7.57  
7.57  
7.55  
7.53  
7.26  
5.47  
5.45  
5.44  
5.42  
5.41  
5.39  
4.51  
4.49  
4.42  
4.40  
4.39  
4.37  
4.36  
4.34  
3.78  
3.77  
1.66  
1.64  
1.53  
1.52

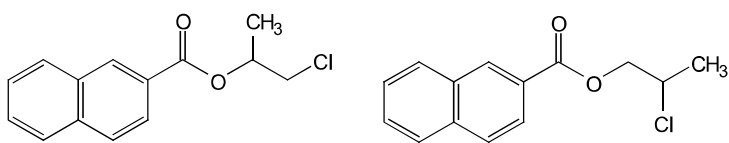

4d

$^1\text{H}$  NMR (400 MHz,  $\text{CDCl}_3$ )

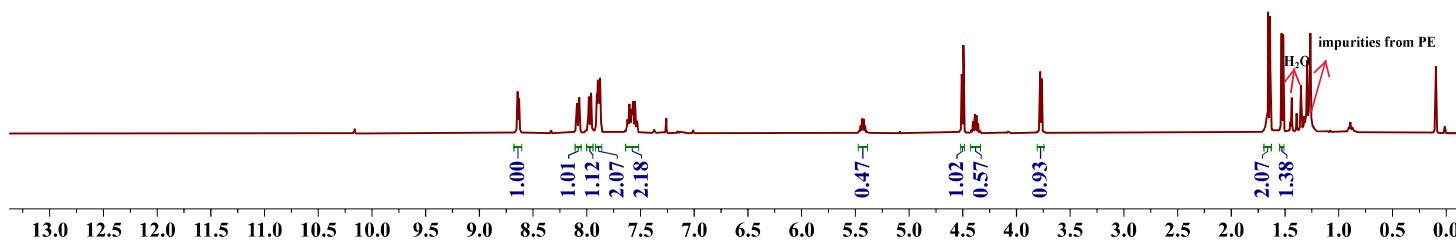

166.19  
165.92  
135.61  
135.57  
132.41  
131.30  
131.20  
129.37  
129.34  
128.39  
128.31  
128.23  
128.15  
127.74  
127.73  
127.20  
126.84  
126.69  
126.64

77.32  
77.00  
76.68  
70.29  
69.04

-54.08  
-47.02

31.39  
30.15  
29.66  
21.64  
17.73

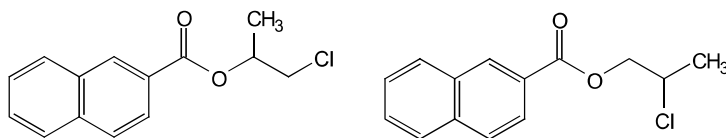

**4d**

$^{13}\text{C}$  NMR (101 MHz,  $\text{CDCl}_3$ )

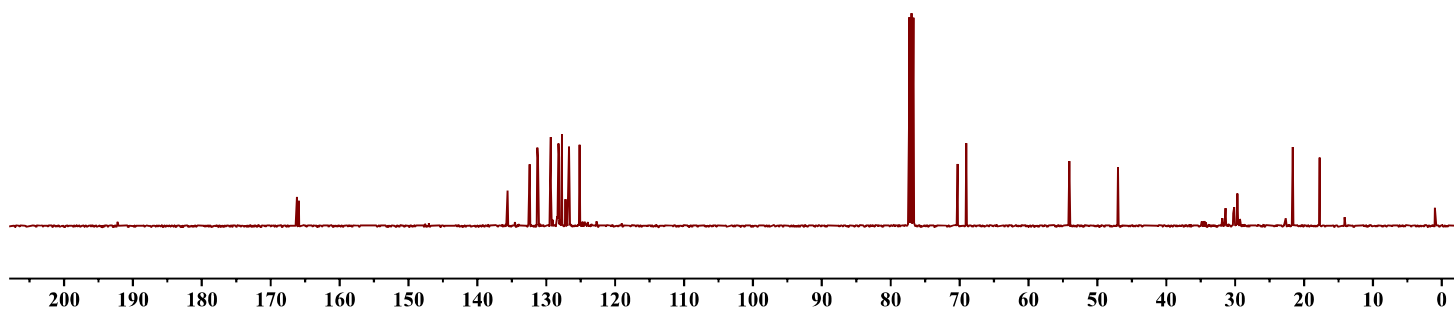

8.06  
8.05  
8.04  
7.54  
7.52  
7.51  
7.50  
7.43  
7.41  
7.39  
5.06  
5.05  
5.04  
5.02  
5.01  
4.03  
4.02  
4.01  
4.00  
3.99  
3.98  
3.97  
2.27  
2.26  
2.25  
2.25  
2.23  
2.22  
2.21  
2.21  
2.19  
2.18  
2.18  
2.18  
1.78  
1.76  
1.75  
1.74  
1.74  
1.73  
1.72  
1.70  
1.70  
1.69  
1.49  
1.48  
1.46  
1.43  
1.41  
1.34  
1.33

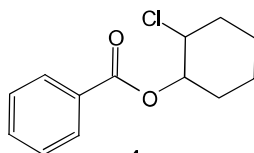

**4e**

$^1\text{H}$  NMR (400 MHz,  $\text{CDCl}_3$ )

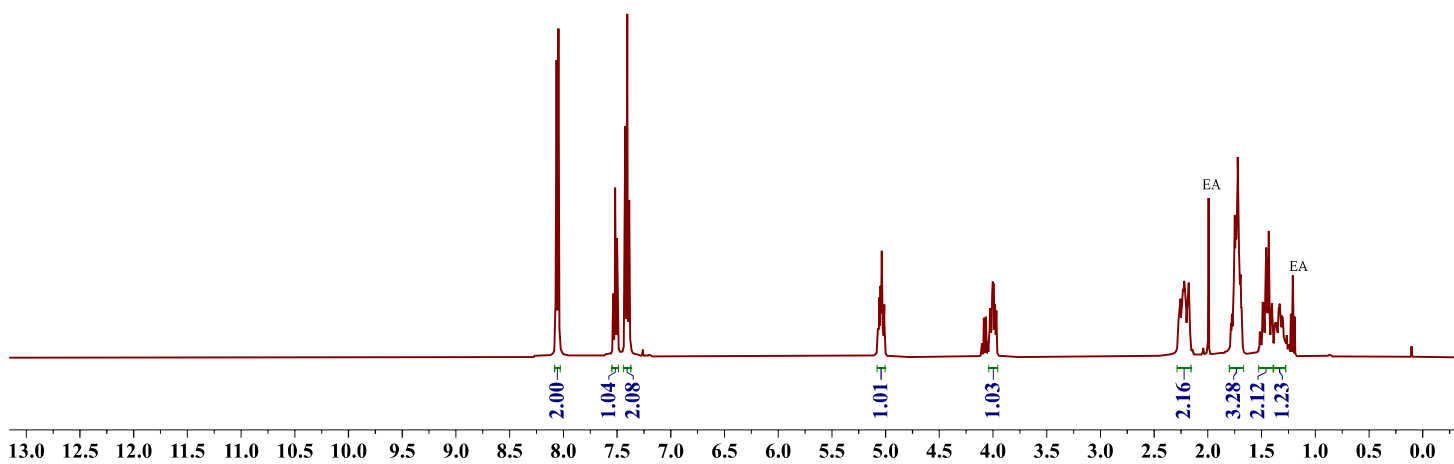

-165.31

132.74  
129.97  
129.39  
128.09

77.32  
77.00  
76.68  
76.03

-60.30

34.38  
30.28  
24.07  
22.90

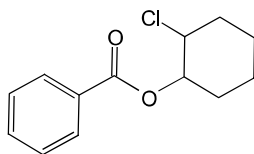

**4e**  
<sup>13</sup>C NMR (101 MHz, CDCl<sub>3</sub>)

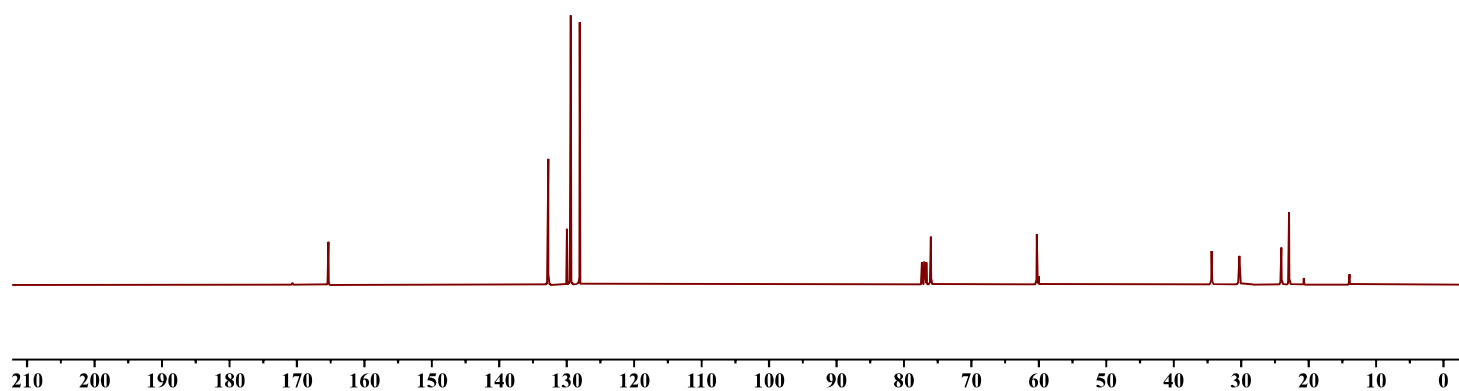

8.20  
8.19  
8.02  
8.01  
8.00  
7.70  
7.68  
7.35  
7.33  
7.31  
7.26  
5.31  
4.06  
4.05  
4.04  
4.03  
4.02  
4.01  
4.00  
2.35  
2.34  
2.33  
2.32  
2.31  
2.30  
2.29  
2.28  
2.26  
2.25  
2.24  
2.22  
1.84  
1.83  
1.81  
1.80  
1.78  
1.75  
1.74  
1.57  
1.54  
1.51  
1.49  
1.47  
1.44  
1.43  
1.40  
1.38  
1.37

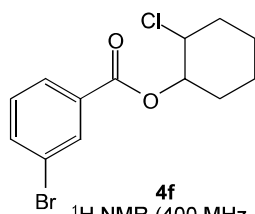

**4f**  
<sup>1</sup>H NMR (400 MHz, CDCl<sub>3</sub>)

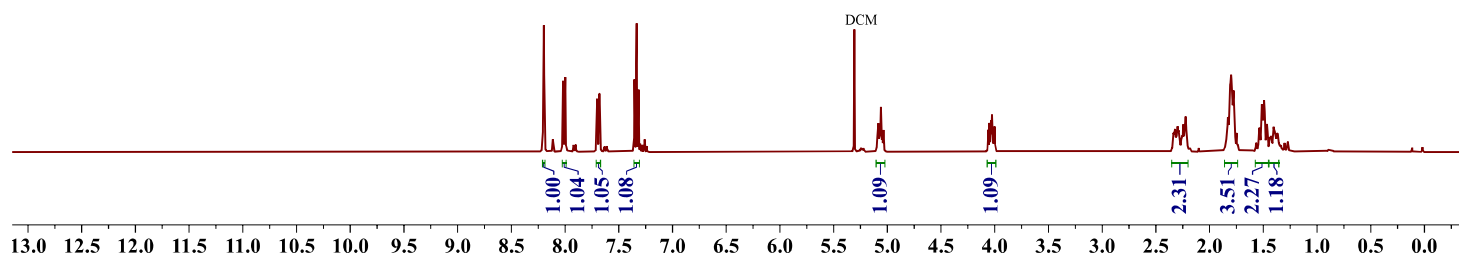

-164.13

135.77  
132.43  
132.00  
129.81  
128.15  
122.28

77.32  
77.00  
76.77  
76.68

-60.42

34.65  
30.57  
24.35  
23.12

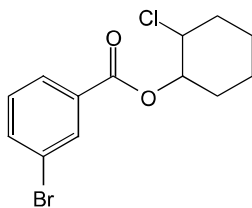

4f

<sup>13</sup>C NMR (101 MHz, CDCl<sub>3</sub>)

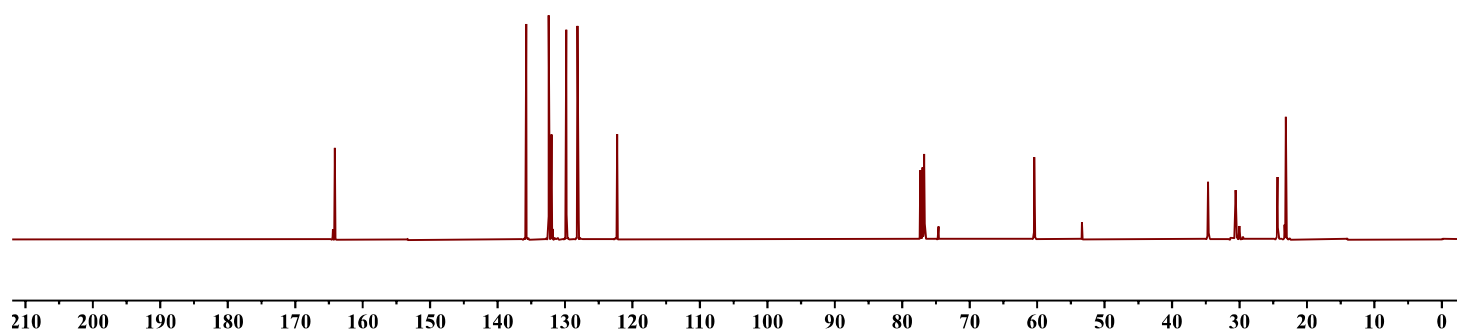

7.88  
7.86  
7.37  
7.36  
7.35  
7.34  
7.32  
7.30  
5.07  
5.06  
5.05  
5.04  
5.03  
4.05  
4.04  
4.02  
4.02  
4.02  
4.01  
3.99  
2.39  
2.38  
2.31  
2.30  
2.29  
2.28  
2.27  
2.25  
2.23  
2.22  
2.21  
1.81  
1.79  
1.78  
1.77  
1.76  
1.75  
1.73  
1.52  
1.51  
1.50  
1.49  
1.47  
1.45  
1.40  
1.38  
1.36  
1.35  
1.35  
1.34

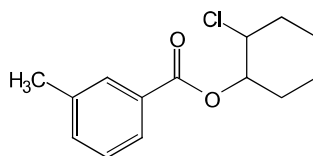

4g

<sup>1</sup>H NMR (400 MHz, CDCl<sub>3</sub>)

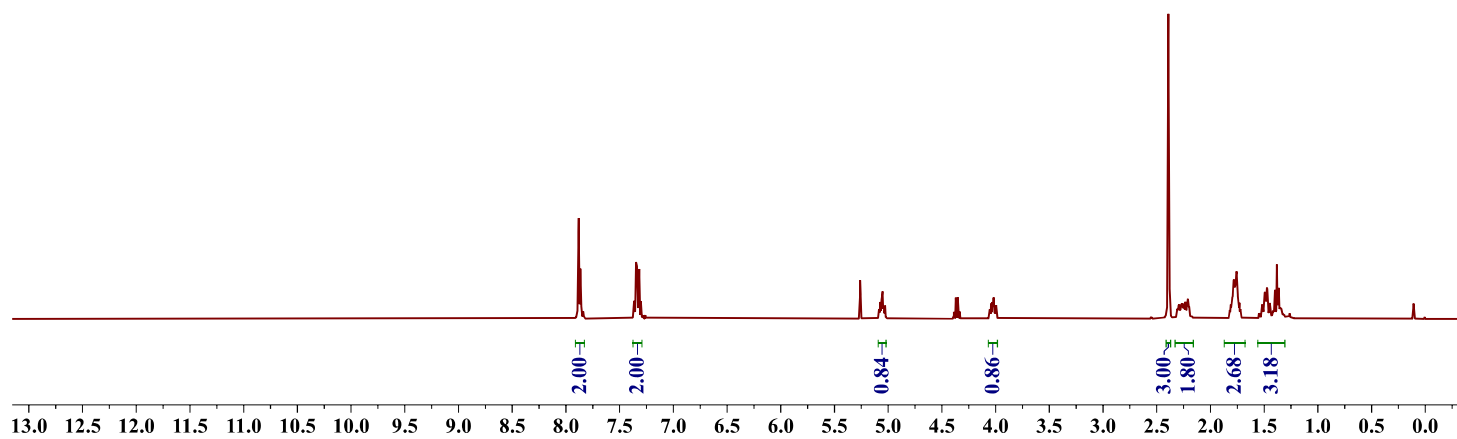

165.64

137.94  
133.60  
130.00  
128.08  
126.66

77.32  
77.00  
76.68  
76.05

60.43

34.51  
30.42  
24.22  
23.03  
21.08  
14.17

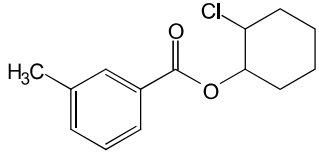

4g

<sup>13</sup>C NMR (101 MHz, CDCl<sub>3</sub>)

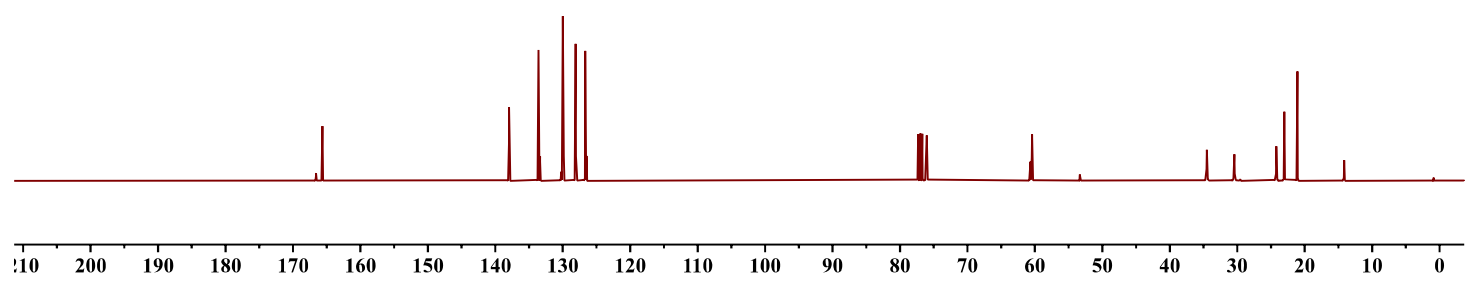

8.09  
8.08  
8.07  
8.06  
7.62  
7.62  
7.61  
7.60  
7.59  
7.58  
7.49  
7.47  
7.45  
7.26  
5.46  
5.45  
5.43  
5.42  
5.41  
3.90  
3.89

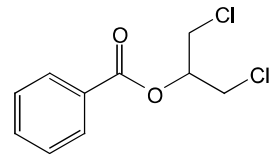

4h

<sup>1</sup>H NMR (400 MHz, CDCl<sub>3</sub>)

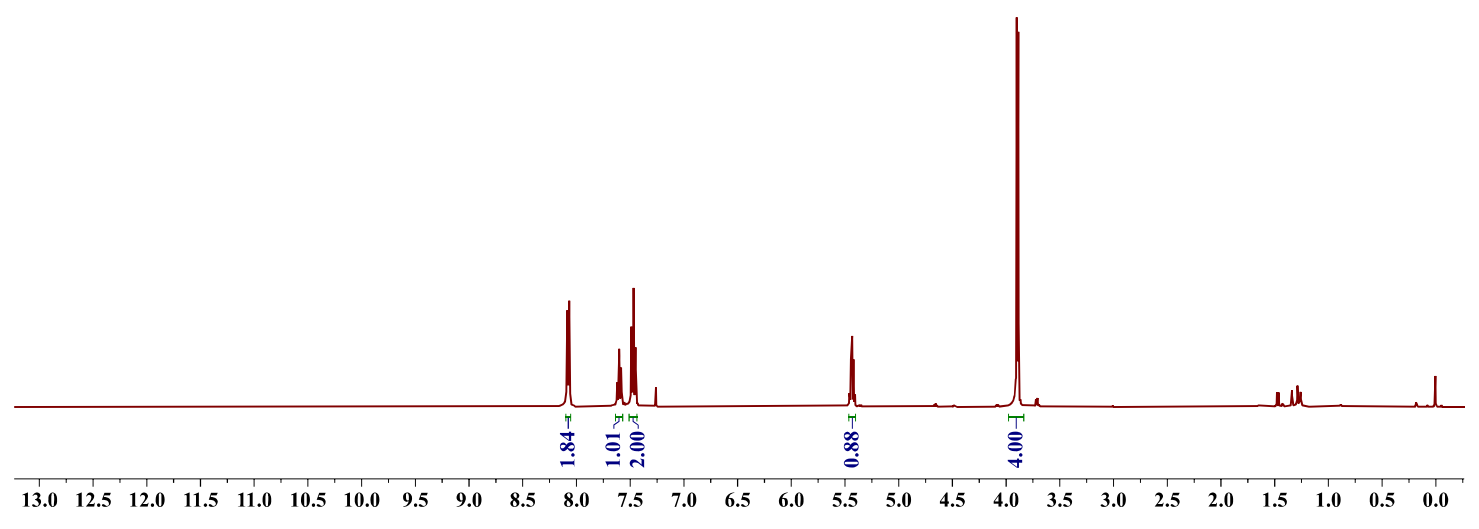

—165.33

133.58  
129.87  
128.50

77.32  
77.00  
76.68  
72.05

—42.42

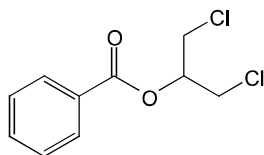

**4h**

<sup>13</sup>C NMR (101 MHz, CDCl<sub>3</sub>)

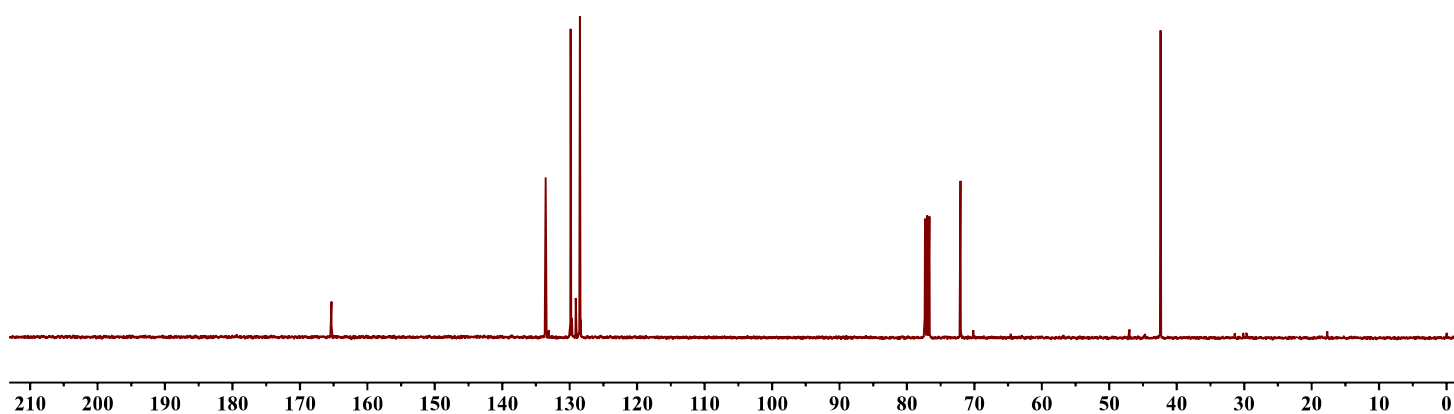

10.42  
7.90  
7.90  
7.88  
7.88  
7.52  
7.52  
7.50  
7.49  
7.48  
7.26  
7.02  
6.99  
6.94  
6.94  
6.92  
6.90  
6.90  
5.48  
5.47  
5.46  
5.45  
5.43  
3.90  
3.89

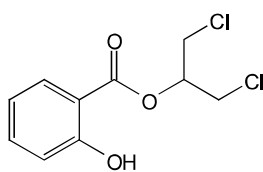

**4i**

<sup>1</sup>H NMR (400 MHz, CDCl<sub>3</sub>)

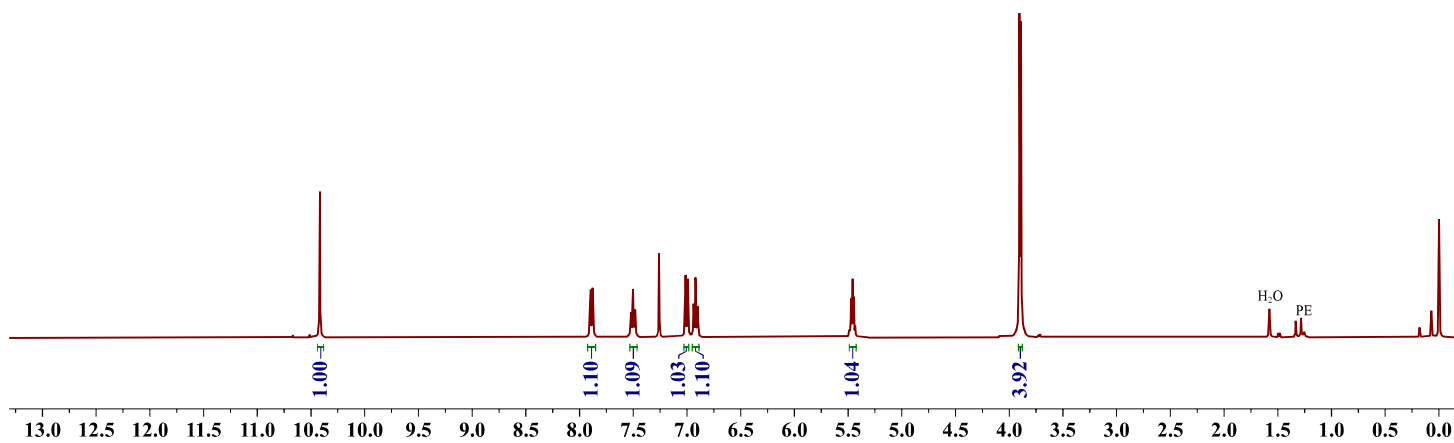

-168.83

-161.87

-136.47

-130.10

-119.46

-117.73

-111.53

77.32

77.00

76.68

72.41

-42.19

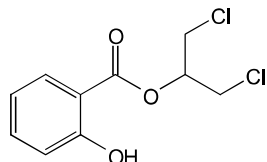

**4i**  
<sup>13</sup>C NMR (101 MHz, CDCl<sub>3</sub>)

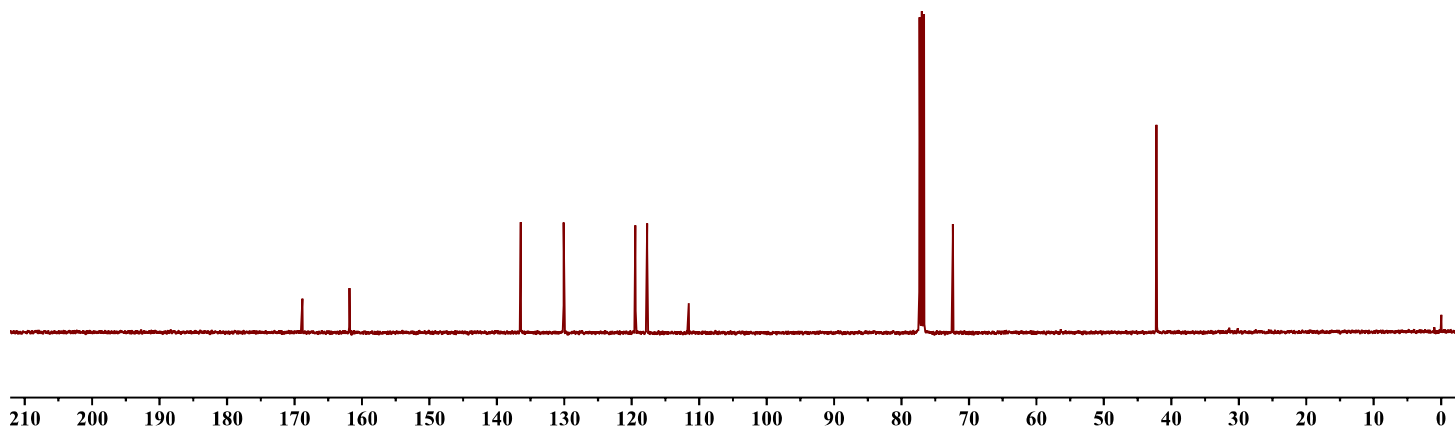

8.08  
8.06  
8.05  
8.04  
7.55  
7.54  
7.53  
7.52  
7.51  
7.44  
7.42  
7.40  
5.23  
4.49  
4.47  
4.46  
4.44  
4.19  
4.18  
4.17  
3.73  
3.72  
3.71  
3.69  
1.87  
1.86  
1.85  
1.84  
1.83  
1.82  
1.80  
1.79  
1.78  
1.77  
1.75  
1.74  
1.73  
1.58  
1.57  
1.56  
1.46  
1.45  
1.44  
1.43  
1.34  
1.29  
0.90  
0.88  
0.87  
0.85

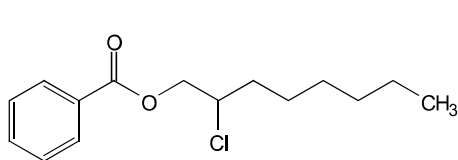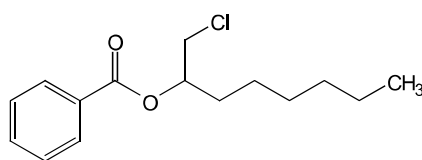

**4j**  
<sup>1</sup>H NMR (400 MHz, CDCl<sub>3</sub>)

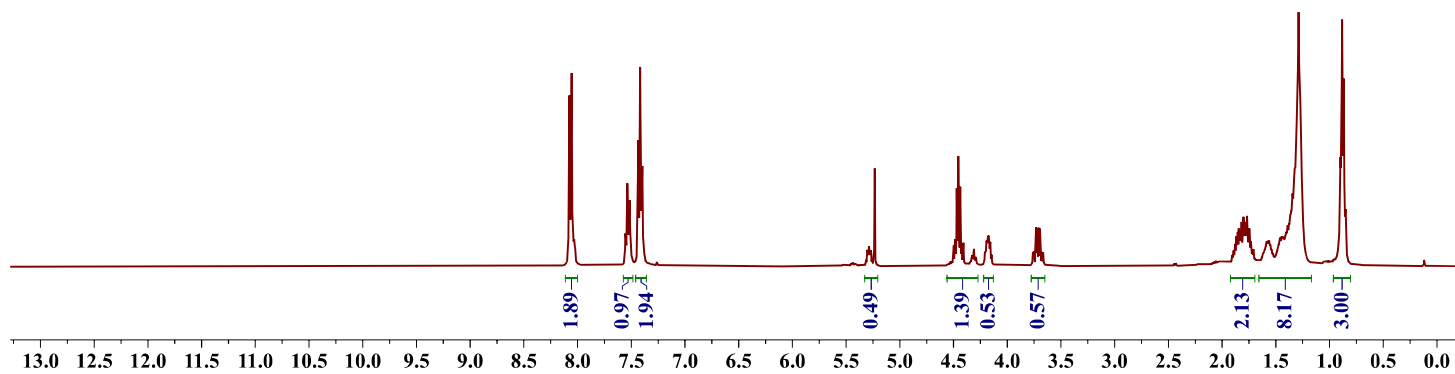



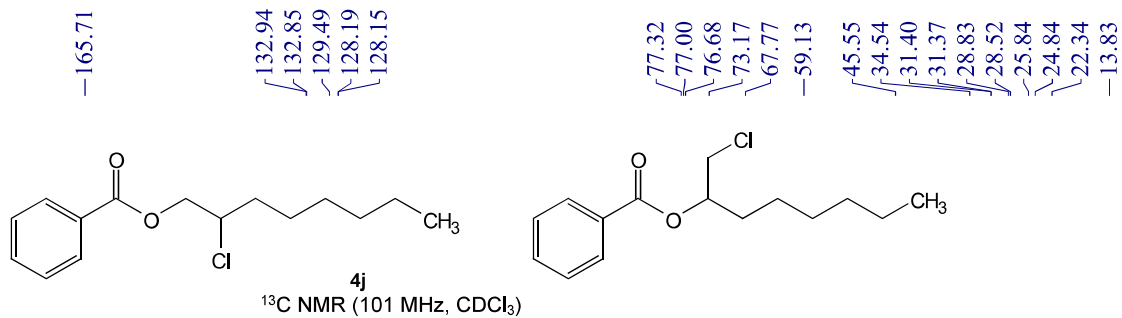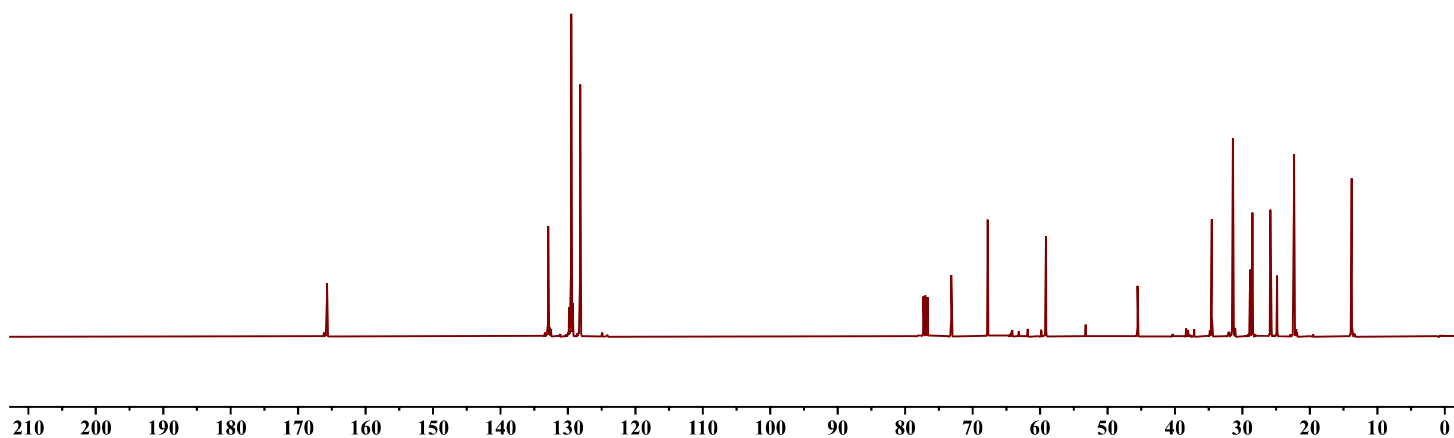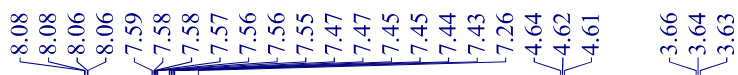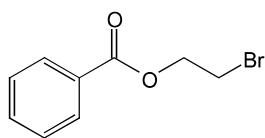

**4k**  
<sup>1</sup>H NMR (400 MHz, CDCl<sub>3</sub>)

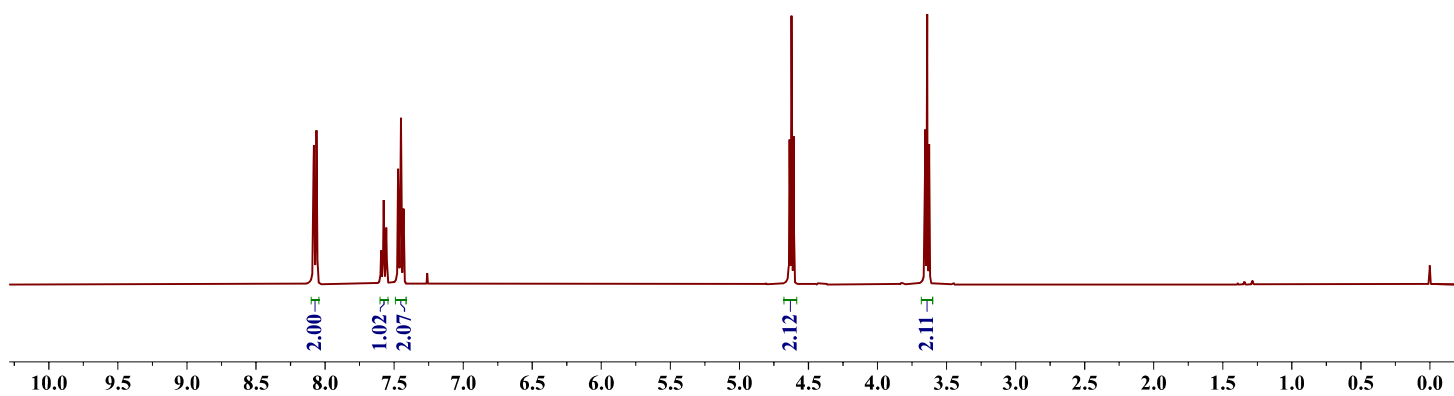

-165.97

133.20  
129.66  
128.38

77.32  
77.00  
76.68

-64.13

-28.76

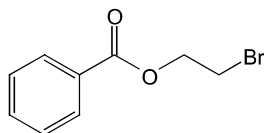

**4k**

<sup>13</sup>C NMR (101 MHz, CDCl<sub>3</sub>)

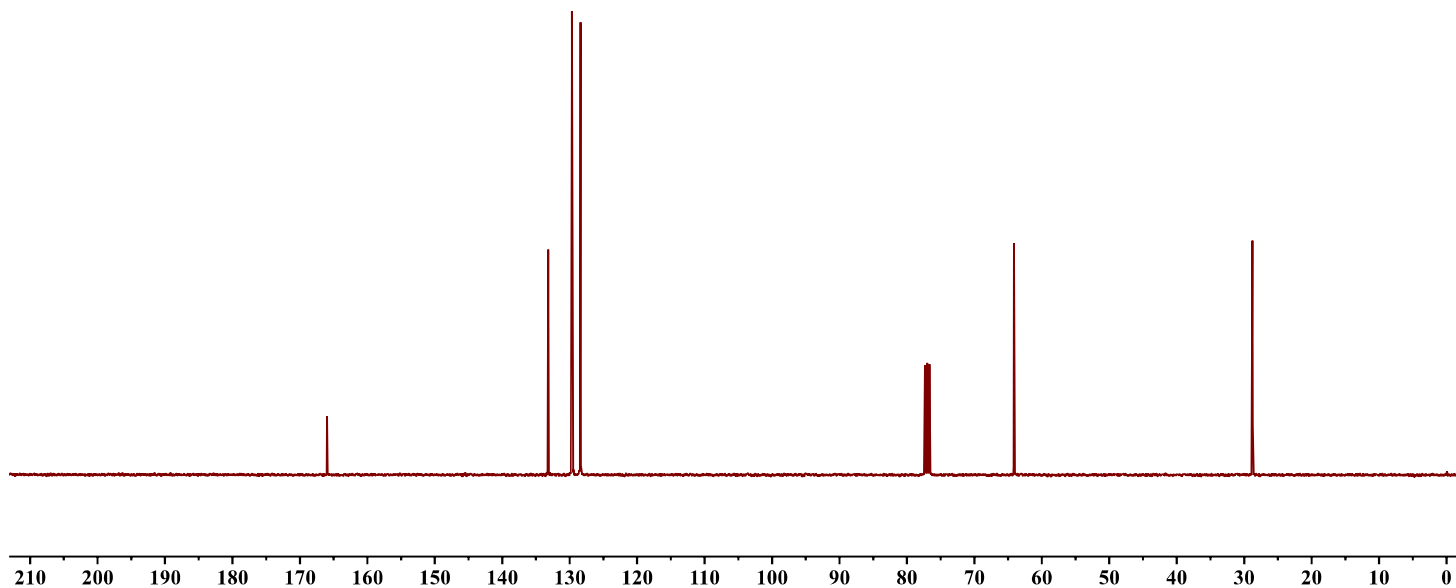

8.64  
8.09  
8.09  
8.07  
8.07  
7.98  
7.96  
7.90  
7.89  
7.88  
7.87  
7.62  
7.62  
7.61  
7.60  
7.60  
7.59  
7.58  
7.57  
7.57  
7.56  
7.55  
7.55  
7.54  
7.53  
7.26  
4.71  
4.69  
4.68  
3.71  
3.70  
3.68

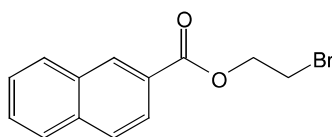

**4l**

<sup>1</sup>H NMR (400 MHz, CDCl<sub>3</sub>)

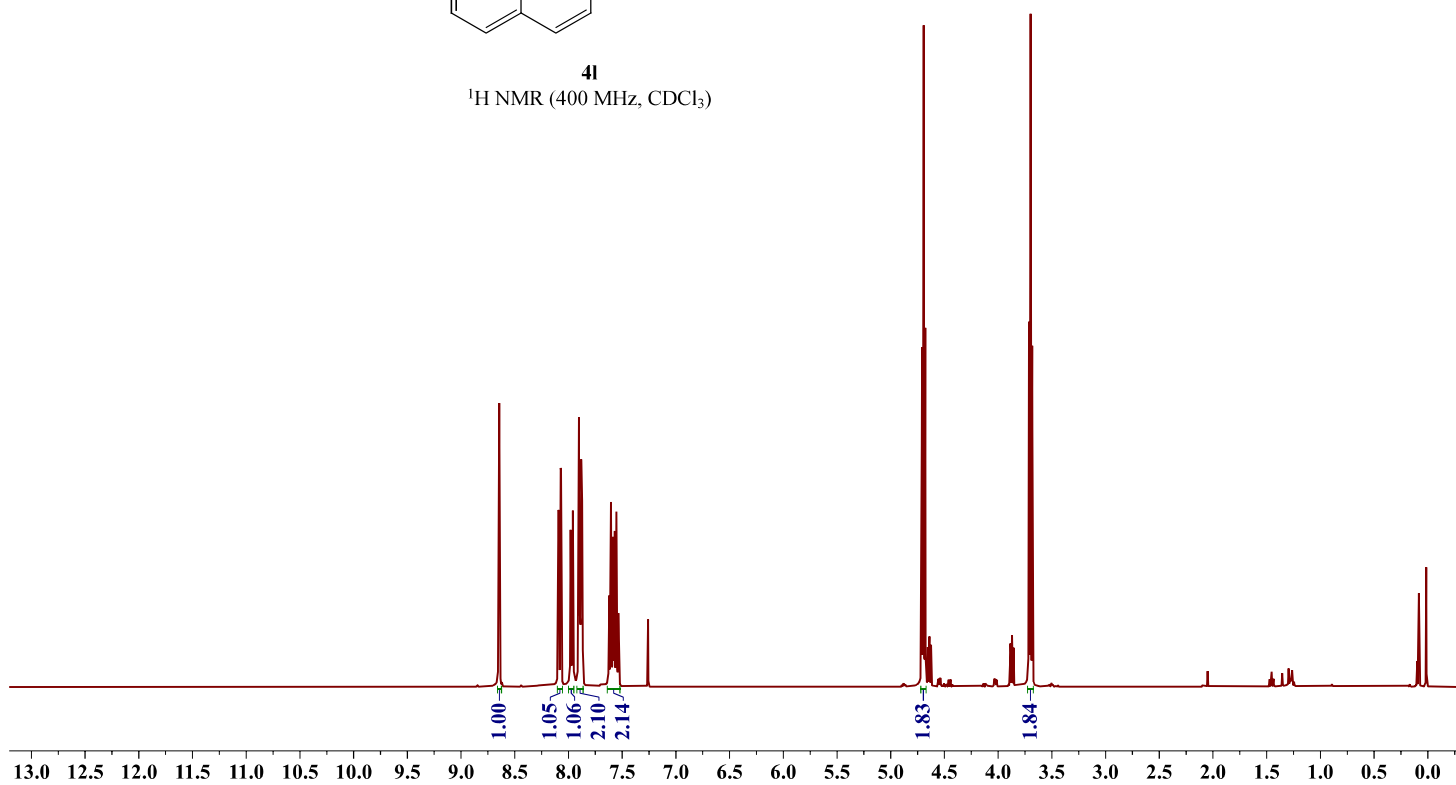

-166.17

135.60  
132.39  
131.32  
129.36  
128.38  
128.22  
127.73  
126.77  
126.68  
125.13

77.32  
77.00  
76.68

-64.28

-28.81

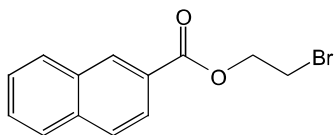

**4l**

<sup>13</sup>C NMR (101 MHz, CDCl<sub>3</sub>)

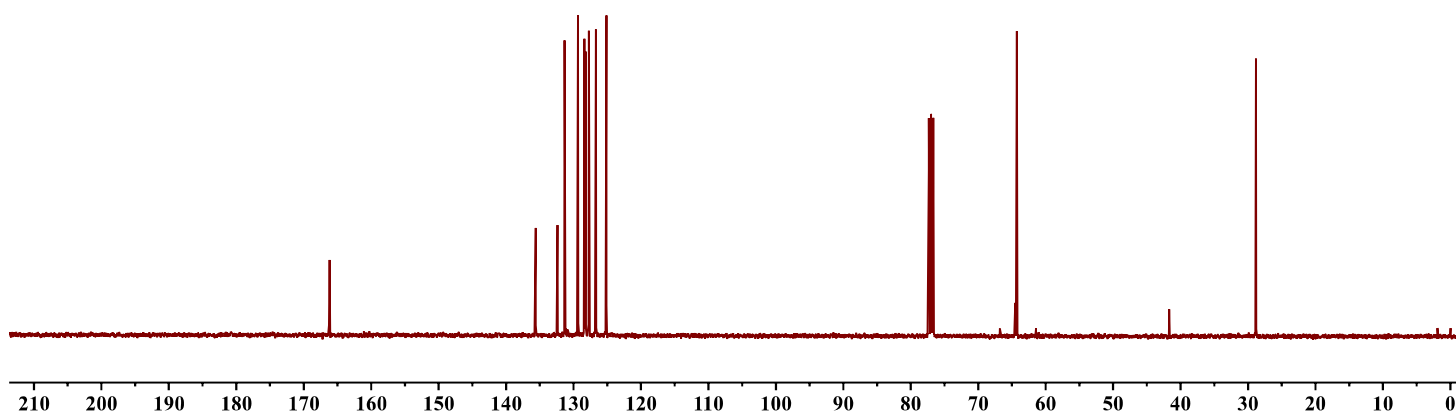

8.04  
8.03  
8.02  
7.58  
7.57  
7.57  
7.56  
7.55  
7.54  
7.46  
7.44  
7.42

4.49  
4.48  
4.46

3.71  
3.70  
3.69

2.26  
2.25  
2.24  
2.22  
2.21

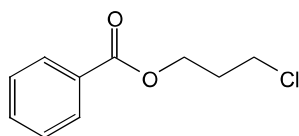

**4m**

<sup>1</sup>H NMR (500 MHz, CDCl<sub>3</sub>)

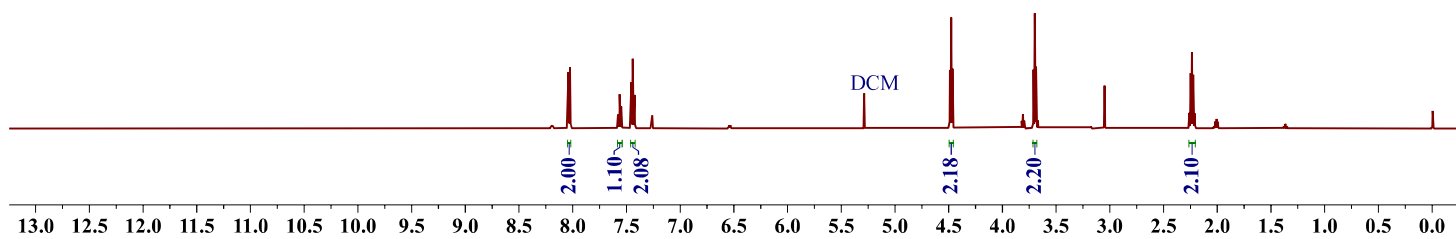

—166.35

133.02  
129.97  
129.52  
128.36

—77.00

—61.62

—41.24

—31.68

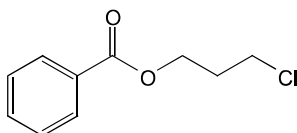

**4m**

<sup>13</sup>C NMR (126 MHz, CDCl<sub>3</sub>)

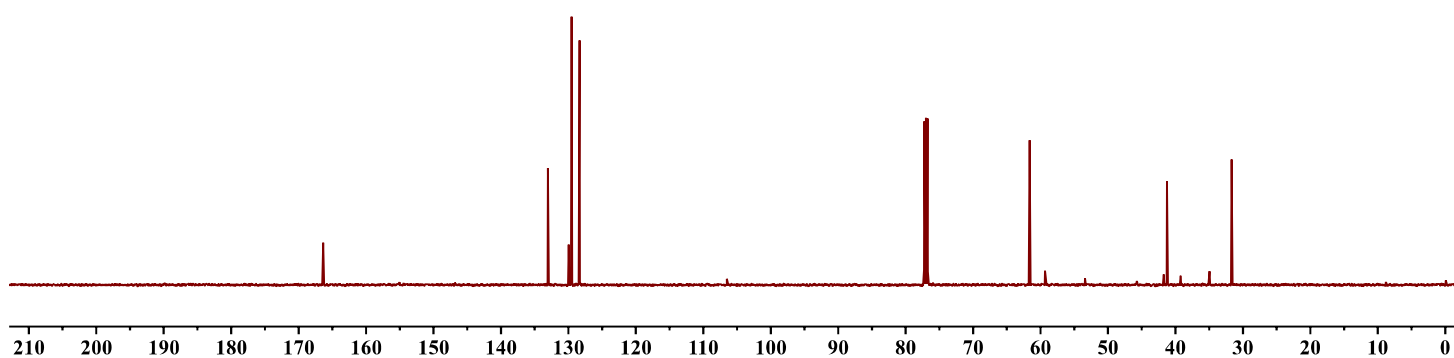

7.92  
7.91  
7.26  
7.26  
7.24  
7.22

4.46  
4.45  
4.44

3.70  
3.69  
3.67

2.40  
2.24  
2.23  
2.22  
2.21  
2.19

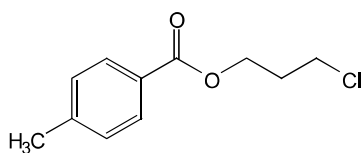

**4n**

<sup>1</sup>H NMR (500 MHz, CDCl<sub>3</sub>)

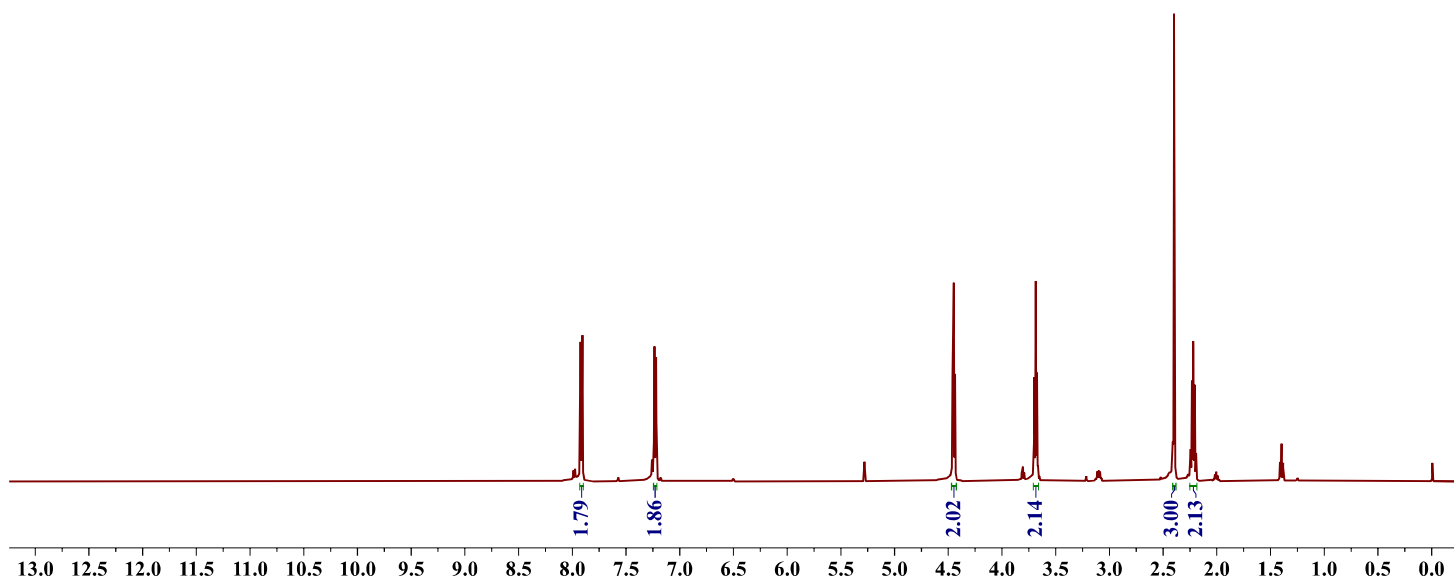

—166.39 —143.69 —129.51 —129.03 —127.20 —77.00 —61.40 —41.26 —31.70 —21.57

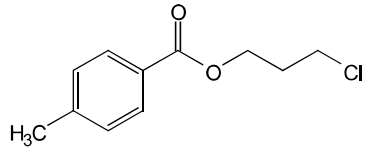

**4n**  
<sup>13</sup>C NMR (126 MHz, CDCl<sub>3</sub>)

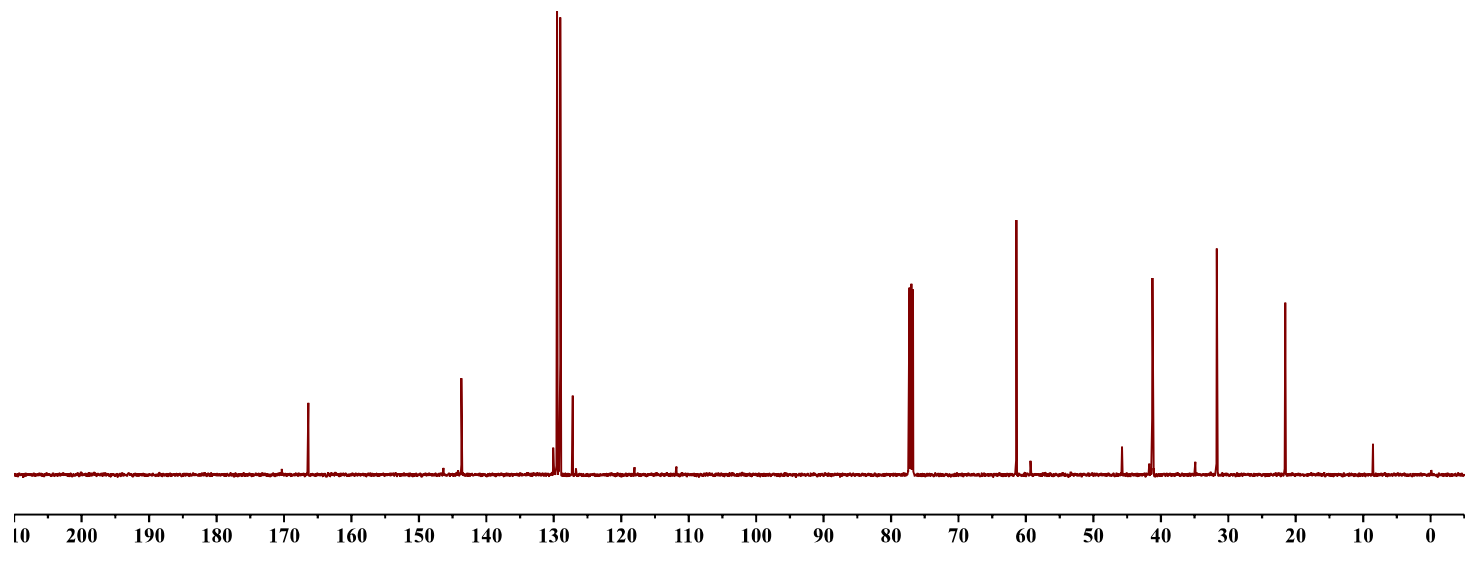

8.14 7.96 7.94 7.68 7.68 7.68 7.67 7.66 7.66 7.33 7.31 7.29 4.48 4.47 4.46 3.70 3.68 3.67 2.25 2.24 2.23 2.22 2.20

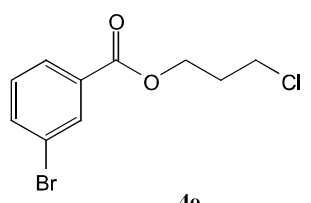

**4o**  
<sup>1</sup>H NMR (500 MHz, CDCl<sub>3</sub>)

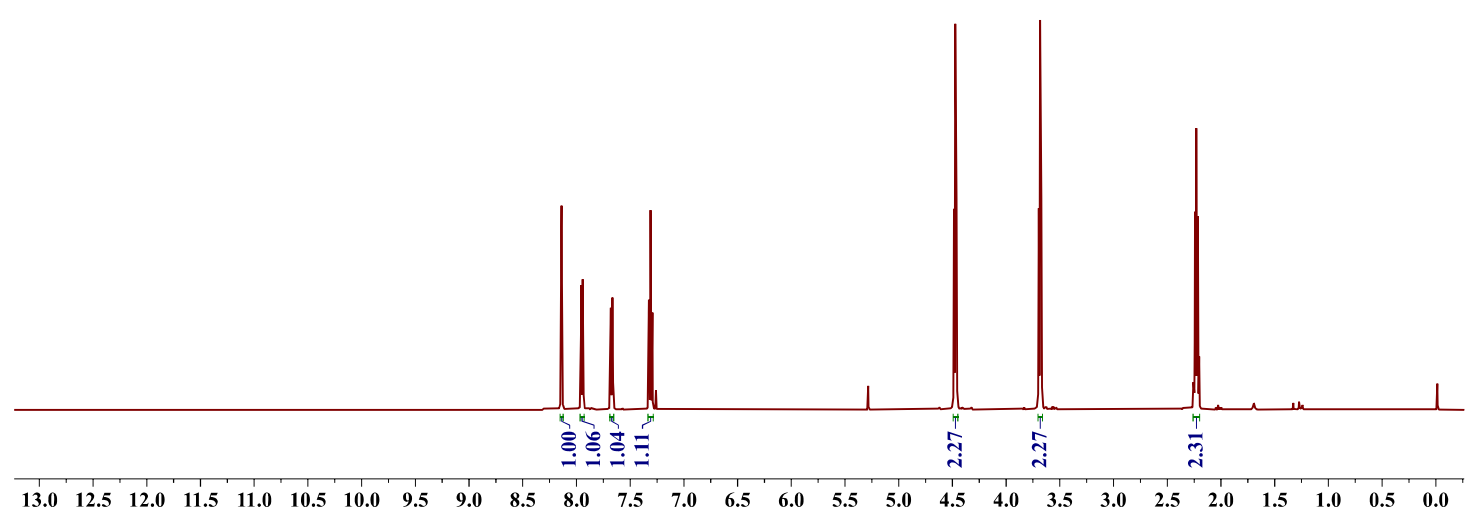

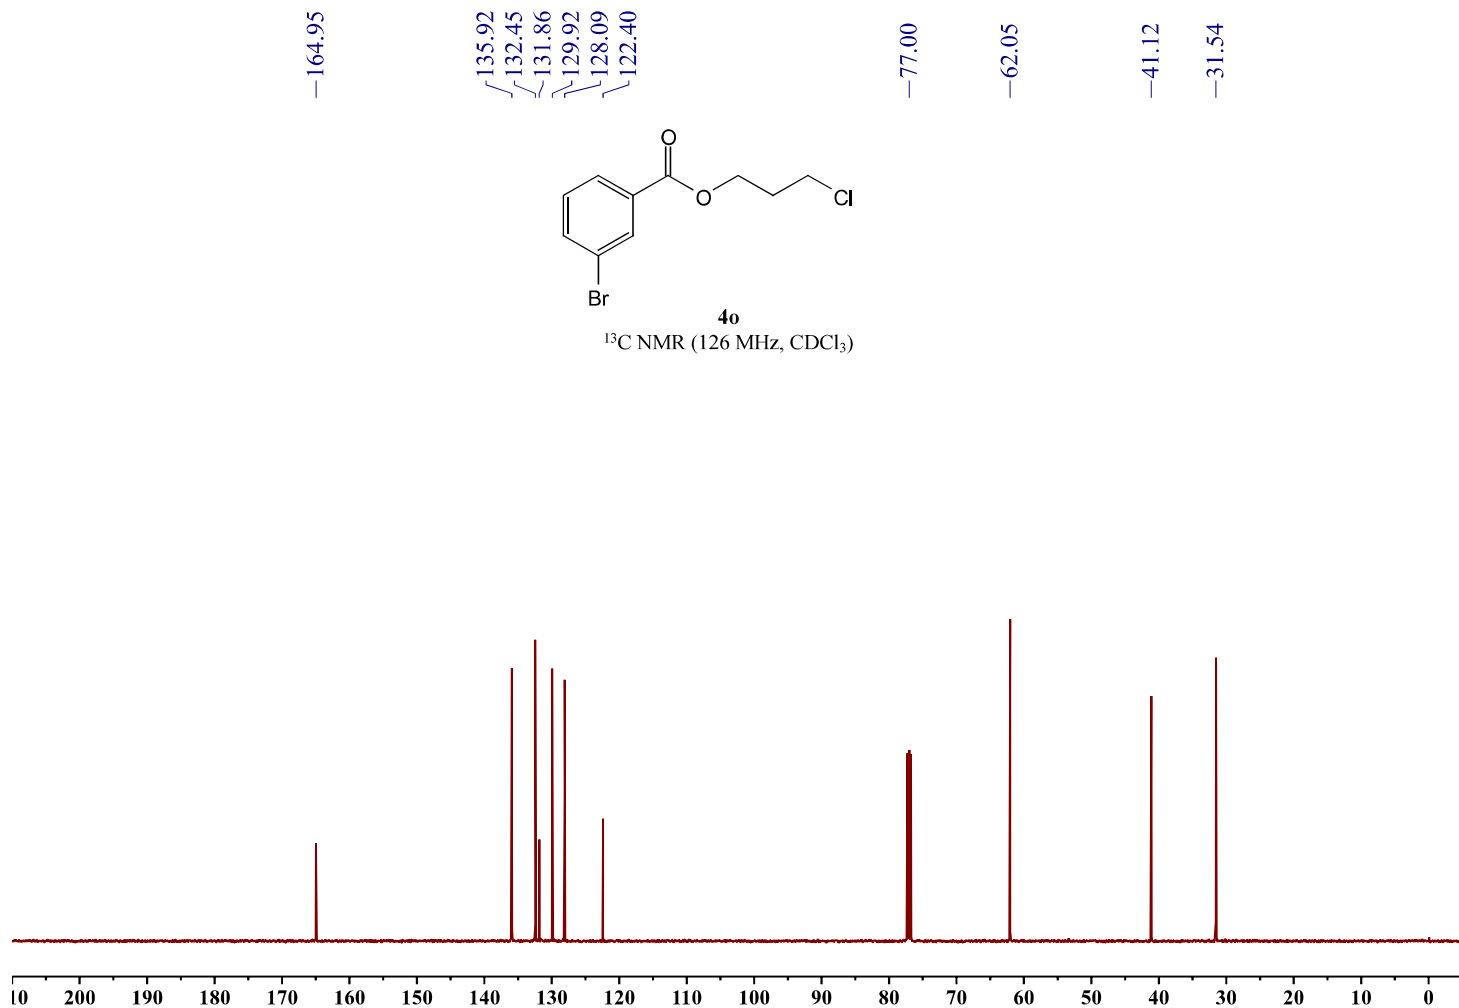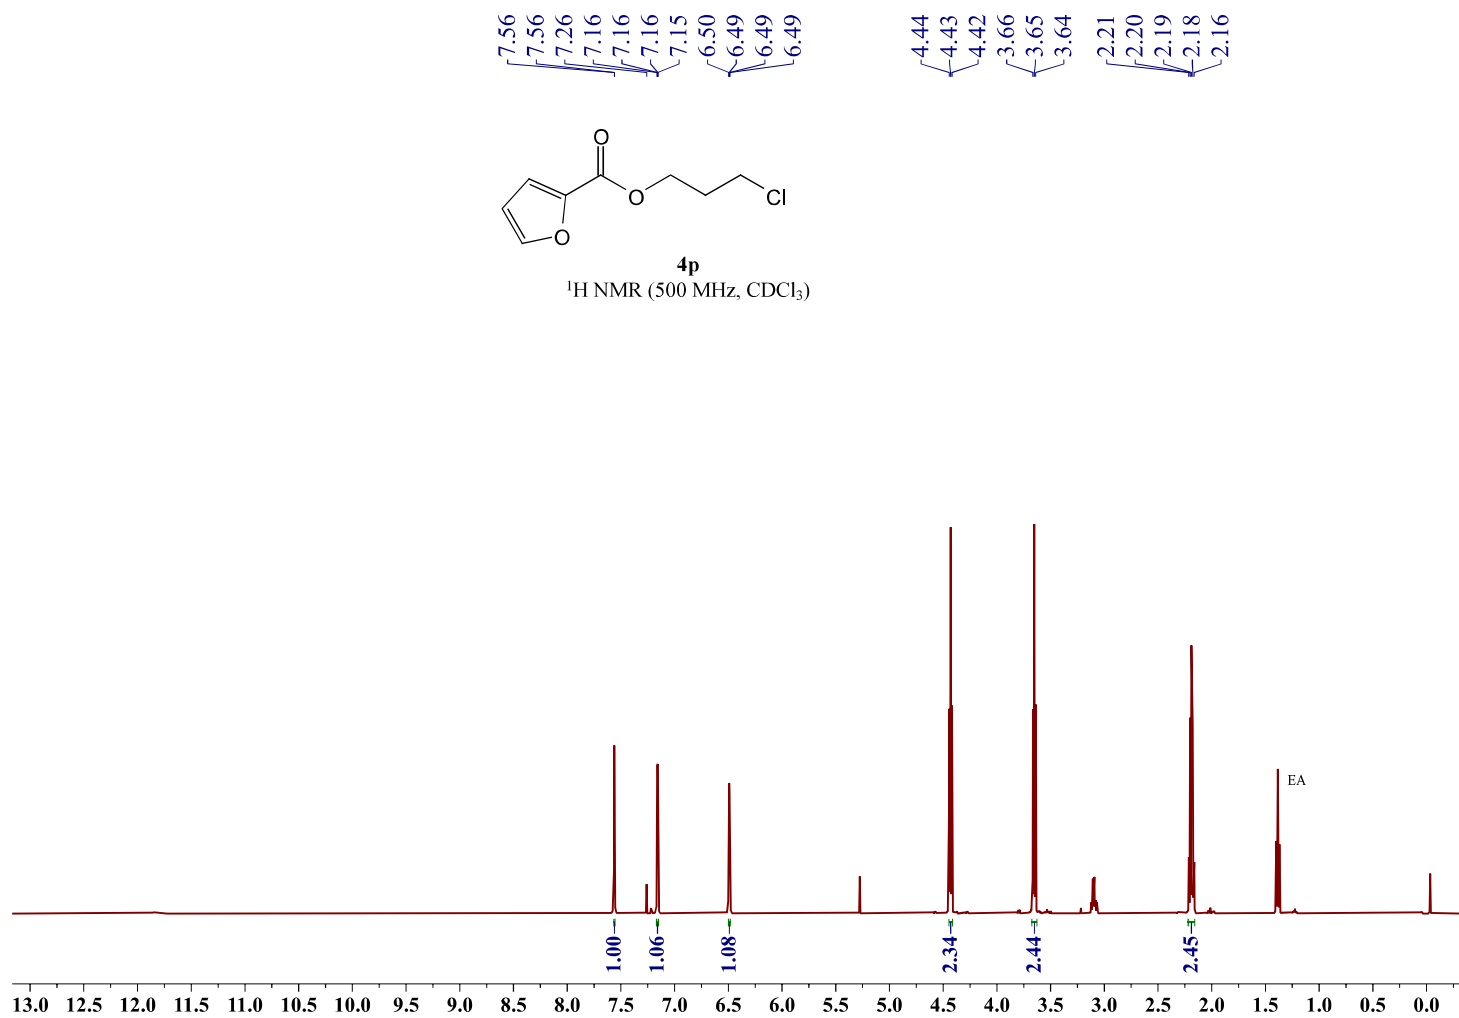

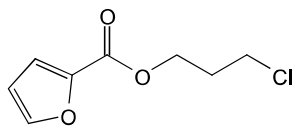

**4p**

$^{13}\text{C}$  NMR (126 MHz,  $\text{CDCl}_3$ )

—158.43  
~146.36  
~144.36  
—118.03  
—111.80  
—77.00  
—61.51  
—45.75  
—41.03  
—31.56  
—8.53

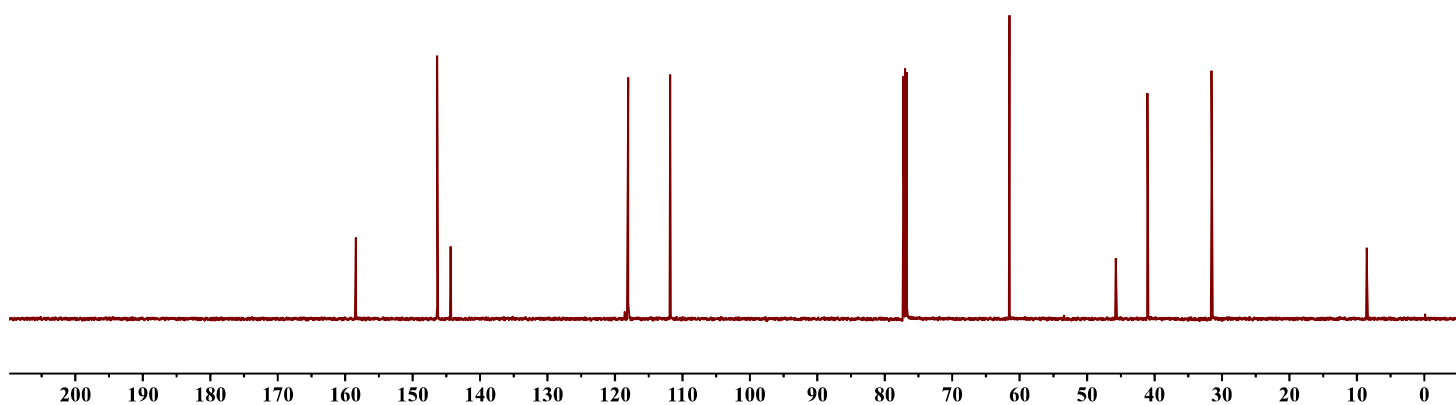

7.26  
5.28  
4.19  
4.18  
4.17  
3.60  
3.58  
3.57  
2.30  
2.29  
2.28  
2.27  
2.26  
2.25  
2.24  
2.09  
2.08  
2.06  
2.05  
2.04  
1.89  
1.88  
1.87  
1.86  
1.85  
1.74  
1.73  
1.72  
1.71  
1.70  
1.63  
1.62  
1.61  
1.60  
1.45  
1.44  
1.42  
1.40  
1.38  
1.37  
1.30  
1.29  
1.27  
1.26  
1.25  
1.24  
1.23  
1.22  
1.20  
1.18

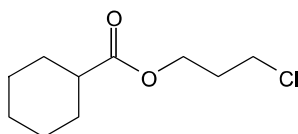

**4q**

$^1\text{H}$  NMR (500 MHz,  $\text{CDCl}_3$ )

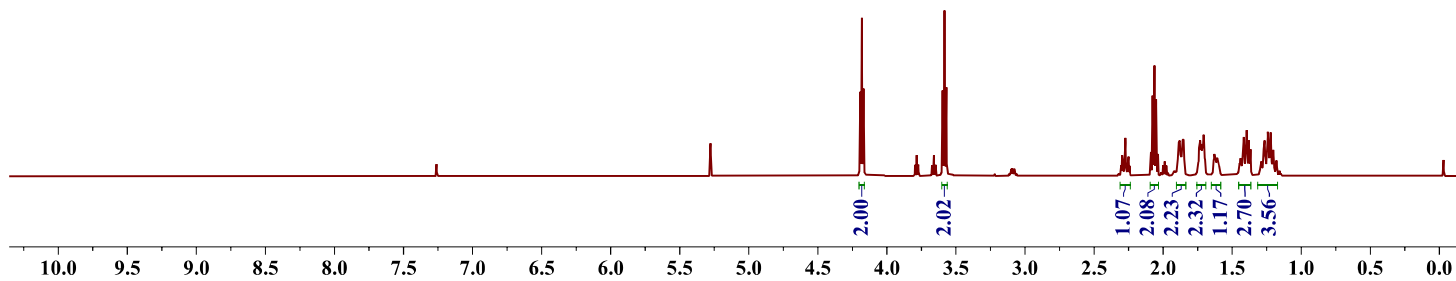

-175.86

77.25  
77.00  
76.75

-60.72

43.06  
41.16  
31.57  
28.92  
25.64  
25.33

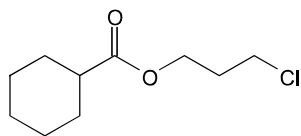

**4q**  
<sup>13</sup>C NMR (126 MHz, CDCl<sub>3</sub>)

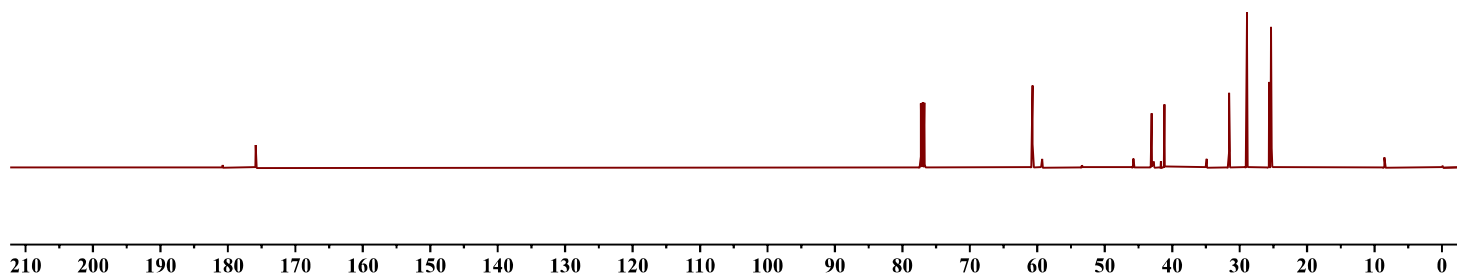

8.61  
8.60  
8.07  
8.06  
8.05  
8.05  
7.97  
7.95  
7.89  
7.88  
7.62  
7.61  
7.60  
7.59  
7.58  
7.57  
7.57  
7.55  
7.54  
7.54  
7.26  
4.56  
4.55  
4.54  
3.76  
3.75  
3.74  
2.32  
2.31  
2.29  
2.28  
2.27

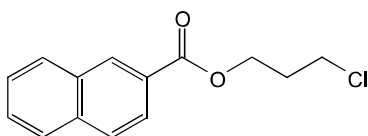

**4r**  
<sup>1</sup>H NMR (500 MHz, CDCl<sub>3</sub>)

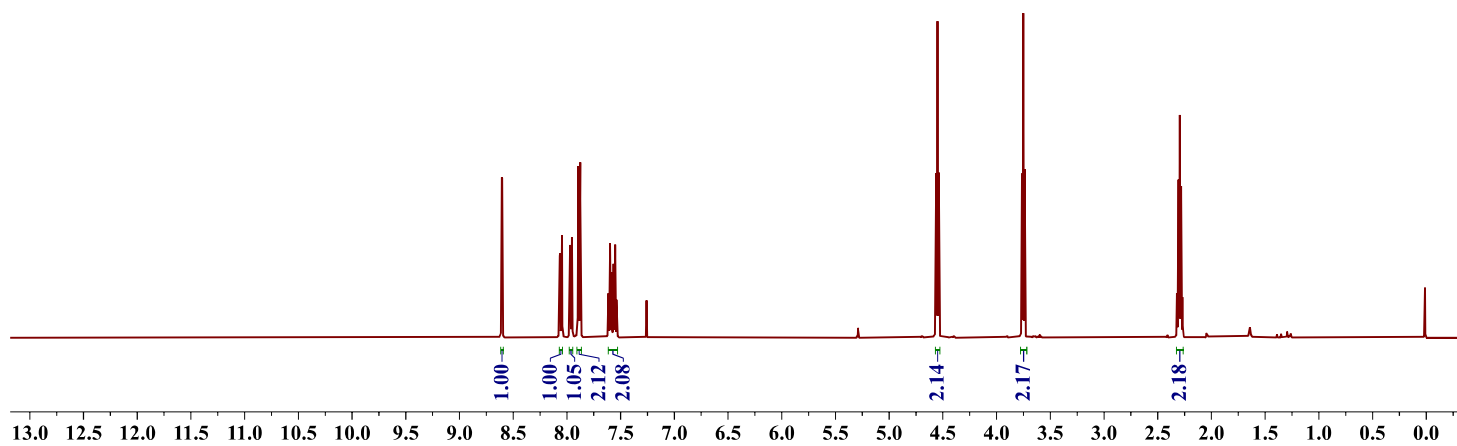



-166.52

135.52  
132.42  
131.04  
129.31  
128.29  
128.17  
127.73  
127.21  
126.67  
125.10

-77.00

-61.80

-41.32

-31.76

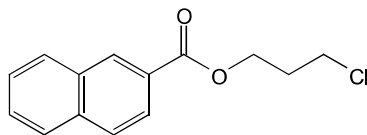

**4r**

<sup>13</sup>C NMR (126 MHz, CDCl<sub>3</sub>)

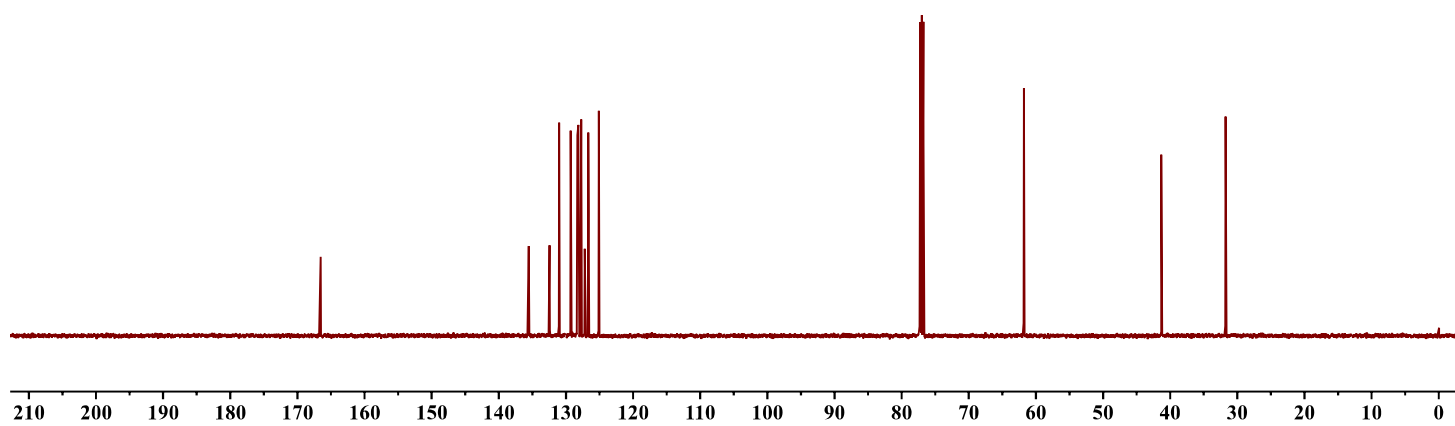

Supplement: d3qo00973d1.pdf [file d3qo00973d1.pdf]
